# Supplementary material for: Identification of 37 Heterogeneous Drug Candidates for Treatment of COVID-19 via a Rational Transcriptomics-Based Drug Repurposing Approach
Source: Pharmaceuticals (Basel). 2021 Jan 25;14(2):87. doi: 10.3390/ph14020087 (PMC7912585; doi:10.3390/ph14020087)
Supplement: Supplementary file 1 [file pharmaceuticals-14-00087-s001.zip › COVID19_Supplementary_Files_pharmaceuticals-1083626_revision1/COVID19_Supplementary_Tables.xlsx]

## Sheet: Description
	Supplementary Tables
	Table S1. List of differentially expressed genes (DEGs) for each dataset separately (8x)
	Table S2. List of differentially expressed genes (DEGs) for each group of datasets separately (4x)
	Table S3. List of 636 DEGs common between A549-ACE2 and Calu-3 (infected with both low and high MOI)
	Table S4. List of significantly enriched pathways involved in SARS-CoV-2 infection (Gene Ontology Biological Process database, based on 636 DEGs, redundant terms removed based on semantic similarity)
	Table S5. Description of Gene Ontology (GO) Biological Process categories for which DEGs were excluded
	Table S6. Final list of 539 DEGs common between A549-ACE2 and Calu-3 (infected with both low and high MOI) after exclusion of "host defense against viral infection" genes
	Table S7. Characterization of 37 drug candidates with a potential to reverse transcriptomic signature upon SARS-CoV-2 infection
	Table S8. Target characterization of 37 drug candidates
	Table S9. Physicochemical properties of 37 drug candidates
	Table S10. Main drug target protein families distribution comparison for all FDA approved drugs and 37 drug candidates
	Table S11. List of significantly enriched pathways regulated by 37 drug candidates (Gene Ontology Biological Process database, most significant results of DSEA and TSEA analysis, redundant terms removed based on semantic similarity)
	Table S12. Main categories of enriched pathways in overlap between pathways regulated by 37 drug candidates and pathways affected by SARS-CoV-2 virus (Gene Ontology Biological Process database, targets from TSEA analysis were first transposed to drugs based on their known interaction)

## Sheet: Table S1
Gene	log2 fold change of significant DEGs (FDR < 0.05)								Number of datasets in overlap for each DEG
	A549 (MOI = 0.2) 45 DEGs	A549 (MOI = 2) 1850 DEGs	A549-ACE2 (MOI = 0.2) 1112 DEGs	A549-ACE2 (MOI = 2) 3898 DEGs	Calu-3 (MOI = 0.3) 1581 DEGs	Calu-3 (MOI = 2) 1960 DEGs	NHBE 109 DEGs	hBO 627 DEGs
CCL20	1.02042	1.44318	9.00093	3.82072	3.58847	3.96063	3.14346	2.35871	8
IFI6	4.3313	NA	1.53821	3.40234	2.46365	1.20221	2.34377	2.81933	7
IRF7	3.18213	NA	2.60398	4.98621	3.4991	3.21157	1.57275	1.19417	7
CFB	1.11481	2.15223	2.06196	1.11702	1.65966	NA	1.85442	1.60213	7
ICAM1	NA	2.78467	3.5193	1.78831	1.86126	3.65345	1.86112	1.62825	7
TNFAIP3	NA	1.67161	3.42707	5.20265	4.54353	5.33495	1.61104	1.31275	7
IL1A	NA	4.30193	6.70682	5.35591	5.29107	5.22931	1.07171	2.3385	7
CXCL2	NA	1.76814	6.88233	5.31978	2.97705	3.37204	1.39085	2.20426	7
CXCL3	NA	1.64727	5.97441	4.0758	1.89969	3.05405	2.23081	2.61173	7
MAFF	NA	1.73799	3.74387	4.33929	1.62981	1.87829	1.13284	1.44565	7
CXCL1	NA	1.22441	5.81564	2.64126	1.20458	1.42659	1.41682	1.55615	7
CSF3	NA	1.90759	5.75305	3.02473	8.45666	6.12309	4.84978	4.50851	7
SAA2	NA	2.18613	4.39274	1.54608	2.72441	1.92078	2.42205	1.73597	7
IFIT1	4.29439	-1.27607	NA	6.8677	4.55395	4.52399	NA	2.32955	6
MX1	5.06493	NA	NA	5.45414	3.358	3.86065	2.50956	2.6008	6
IRF9	2.15821	NA	1.19445	1.82825	1.49006	1.8184	1.25006	NA	6
OAS1	1.54175	-1.12034	NA	3.34336	3.28123	3.01263	1.69574	NA	6
OAS3	1.38642	NA	NA	2.57123	2.4291	2.94371	1.31726	1.32374	6
DDX60	2.29746	1.53908	NA	3.74813	2.37294	3.01638	NA	1.2193	6
OAS2	4.19003	NA	NA	6.30729	4.18019	4.85183	1.26587	1.47321	6
KRT4	-1.14746	-5.30869	-2.28694	-4.40264	NA	NA	1.0128	-2.89785	6
IFITM1	4.20875	NA	NA	4.91372	4.58694	3.63365	1.61527	2.10968	6
IFI44	4.61093	1.74654	NA	6.24831	2.46964	3.03754	NA	1.47174	6
XAF1	6.08519	NA	NA	5.48397	3.91123	4.58149	2.53187	1.32101	6
IFIT2	1.1542	NA	1.10538	6.92487	7.09904	5.29233	NA	1.52929	6
IFI44L	5.67418	NA	NA	5.80598	2.46139	4.08952	2.27739	2.9392	6
BST2	2.82638	NA	NA	2.51062	5.80828	4.28504	1.29316	1.07178	6
C15orf48	NA	2.75035	NA	1.11802	2.03826	1.58421	1.23555	2.06777	6
BIRC3	NA	1.908	NA	2.21239	2.35654	2.14776	1.66058	1.20902	6
C1QTNF1	NA	1.25099	NA	1.07186	2.15833	3.0072	1.87092	2.72667	6
C3	NA	1.3135	1.91734	NA	1.39435	1.29244	1.50825	1.24736	6
SOCS3	NA	1.5939	2.32383	2.19075	1.7999	1.02393	1.03681	NA	6
CCL2	NA	1.14332	3.11431	2.81039	1.29721	2.56377	NA	1.63523	6
CSF2	NA	3.88701	NA	5.09332	4.47406	7.04367	2.98195	4.61786	6
PDGFB	NA	1.95892	-1.48462	1.96414	NA	1.79421	1.01424	2.48588	6
HBEGF	NA	1.90457	NA	1.8814	2.08561	2.60282	1.29148	1.43019	6
ADAM8	NA	-1.27246	NA	2.24593	1.71376	1.12066	1.01411	1.22755	6
LTB	NA	1.24487	7.57006	3.32889	1.7859	3.55623	1.63621	NA	6
IL23A	NA	2.0678	3.35384	2.92341	1.61369	2.19057	NA	3.55959	6
INHBA	NA	2.93109	NA	2.68027	2.8054	3.51482	1.81891	2.6238	6
POU2F2	NA	1.20899	1.92367	3.154	1.89418	1.30751	NA	1.67302	6
ZC3H12A	NA	NA	2.33789	3.20255	1.41117	1.70944	1.67346	1.14514	6
ISG15	3.76433	NA	NA	4.35453	3.54296	2.48329	NA	2.61093	5
HELZ2	1.49712	NA	NA	4.23276	3.22759	3.18247	1.01014	NA	5
IFIT3	1.96729	NA	NA	6.13016	5.84001	4.89905	NA	2.19408	5
DDX58	1.76974	NA	NA	4.20443	3.18257	2.79991	NA	1.02565	5
IFIH1	1.80901	1.20543	NA	5.04254	4.14976	4.0361	NA	NA	5
HERC6	1.45871	NA	NA	2.12128	2.44295	2.00093	NA	1.55955	5
IFI35	1.14713	NA	NA	2.38331	3.46397	2.23847	NA	1.36982	5
IFI27	3.53384	NA	NA	4.08619	4.66027	NA	2.8941	2.38745	5
OASL	2.69065	NA	NA	7.77909	5.61513	3.43561	NA	2.42147	5
SAMD9L	1.88274	1.62377	NA	3.75794	4.39117	3.48799	NA	NA	5
CMPK2	2.01983	NA	NA	6.7287	5.00258	4.67853	NA	3.62375	5
IFI16	1.21296	1.40145	NA	3.41566	3.3377	3.15242	NA	NA	5
GBP1	1.01457	1.71342	NA	2.56723	3.95071	4.09139	NA	NA	5
BATF2	1.30995	NA	NA	5.60161	4.67778	4.21392	NA	1.19446	5
THEMIS2	1.59826	NA	NA	6.00489	3.62172	2.55092	NA	1.29424	5
ALDH1L2	NA	3.17596	-2.66558	-1.04446	1.25	3.03039	NA	NA	5
FADS2	NA	-1.99221	-1.08424	-2.32918	-1.22274	-1.37142	NA	NA	5
EREG	NA	2.98907	2.50333	3.14664	1.17952	1.77773	NA	NA	5
SERPINE1	NA	2.74969	-1.18207	NA	3.25644	4.80821	NA	2.59719	5
NR4A1	NA	-2.60628	3.04846	2.88489	1.43523	1.2709	NA	NA	5
DHCR24	NA	-2.08724	-1.43318	-1.93883	-1.11296	-1.33282	NA	NA	5
TIPARP	NA	2.42377	1.55568	3.75327	2.79125	3.09469	NA	NA	5
DHCR7	NA	-1.71655	-1.3257	-1.40624	-1.35736	-1.8948	NA	NA	5
CCL5	NA	2.90682	NA	1.49027	10.1172	5.03616	NA	3.36921	5
FDPS	NA	-1.69839	-1.35594	-1.39369	-1.14234	-1.46121	NA	NA	5
TM4SF4	NA	-2.36757	-1.2136	-3.39968	-1.11037	-2.48081	NA	NA	5
IRAK2	NA	1.85725	NA	2.47958	1.63501	2.66733	1.59989	NA	5
PPP1R15A	NA	2.02336	3.21407	4.89709	5.88102	3.88022	NA	NA	5
IER3	NA	1.5105	2.68694	4.22963	NA	1.64959	NA	1.3187	5
C1R	NA	1.55542	2.29781	1.15823	2.14582	2.18963	NA	NA	5
ATF3	NA	2.83653	2.54168	3.54308	6.02045	4.9724	NA	NA	5
BCL2A1	NA	2.16902	NA	2.87808	NA	4.19337	2.28502	1.95862	5
MVD	NA	-1.73058	-1.10742	-1.02182	-1.10189	-1.9782	NA	NA	5
H1F0	NA	1.27028	1.31707	1.26959	2.04258	1.19564	NA	NA	5
IL32	NA	1.66311	NA	NA	2.41575	1.24977	1.22027	1.93723	5
RELB	NA	1.29746	1.48497	2.44283	2.02416	1.63884	NA	NA	5
GADD45A	NA	2.06471	1.08484	2.06891	1.55416	2.25663	NA	NA	5
FDFT1	NA	-1.24444	-1.02101	-1.24406	-1.15408	-1.51887	NA	NA	5
CD68	NA	1.6309	-1.02439	1.06619	2.8123	1.01211	NA	NA	5
GADD45B	NA	1.20708	1.23134	2.4372	1.84146	1.85998	NA	NA	5
MT2A	NA	1.18379	NA	1.02405	5.3765	2.43872	NA	1.95707	5
SERPINA3	NA	1.42572	1.58649	NA	-1.05627	NA	1.46728	2.36729	5
DNAH17	NA	2.58992	1.85141	3.40191	6.19274	3.32526	NA	NA	5
ZC3H12C	NA	1.37167	1.399	1.83837	1.8681	2.11023	NA	NA	5
CREBRF	NA	1.92506	2.478	3.72625	1.3537	1.97159	NA	NA	5
CXCL5	NA	1.07485	1.5446	NA	NA	1.03884	3.48394	3.07615	5
HLA-B	NA	1.29129	2.93393	1.85181	2.74889	NA	NA	1.46456	5
TNFRSF9	NA	2.2475	NA	3.08592	5.62997	4.64428	NA	1.83104	5
PTX3	NA	3.69947	4.8787	3.38432	4.22757	3.61508	NA	NA	5
PMAIP1	NA	1.46322	1.44925	1.71735	4.03109	2.60334	NA	NA	5
RHCG	NA	1.52925	NA	NA	3.49676	2.1092	1.34824	1.34395	5
IL6	NA	4.49072	NA	3.17943	6.3882	6.06157	2.9278	NA	5
DUSP5	NA	1.12539	NA	1.40073	1.72769	1.69879	NA	1.24317	5
PLAUR	NA	1.2438	NA	1.67246	3.83477	1.98353	NA	1.59915	5
NFE2L3	NA	1.10283	-1.33058	1.1164	1.46334	1.19025	NA	NA	5
NKX3-1	NA	1.42345	1.00189	2.94799	3.62273	2.23406	NA	NA	5
MXD1	NA	1.5486	1.59501	2.764	2.99744	1.78999	NA	NA	5
HIVEP1	NA	1.04854	1.65905	2.88763	1.01843	2.01488	NA	NA	5
ZEB2	NA	1.29989	2.06359	2.54643	7.90712	3.42002	NA	NA	5
PLA2G4C	NA	1.89176	NA	1.555	4.34227	2.36569	NA	2.18866	5
NR4A2	NA	-1.51651	2.00575	1.9119	2.24392	1.71328	NA	NA	5
TRIM36	NA	2.13895	NA	1.12984	1.60128	1.45405	NA	1.34297	5
JUN	NA	1.81002	1.53581	3.09957	3.02588	2.45171	NA	NA	5
TM7SF2	NA	-1.00693	-1.17559	-2.10936	-1.51759	-1.69182	NA	NA	5
IL1B	NA	2.58086	NA	NA	2.79209	4.20292	1.06212	3.41487	5
DDC	NA	-4.78479	-1.46966	-4.01222	-1.1848	-2.58029	NA	NA	5
B3GNT5	NA	1.24592	1.5403	2.67053	1.28831	1.83343	NA	NA	5
IL15	NA	1.06024	NA	1.32705	1.51718	2.01318	NA	1.33059	5
ZNF488	NA	-1.22504	-1.33811	-1.77472	NA	-1.95089	-1.14111	NA	5
ANKRD1	NA	1.62091	-1.32447	NA	1.48517	3.49736	NA	1.88613	5
RASGRP1	NA	1.22799	1.68381	1.89868	1.21967	2.05638	NA	NA	5
RASD1	NA	-3.2995	2.9214	1.78007	4.0739	NA	NA	1.85271	5
NR4A3	NA	-1.79244	4.65753	2.96098	6.36646	5.57496	NA	NA	5
ANXA9	NA	-1.51222	-1.27027	-1.75165	-1.45802	-1.77045	NA	NA	5
GBP4	NA	2.77557	NA	4.15163	5.69186	4.42318	NA	1.07582	5
SNX16	NA	1.18498	1.94367	1.18846	1.06903	1.40406	NA	NA	5
SEMA7A	NA	1.88228	NA	2.25031	1.41305	2.33075	NA	1.43851	5
LAMP3	NA	1.99158	NA	3.36864	4.89	3.64524	NA	1.88496	5
ZNF14	NA	1.09906	1.78895	2.8428	1.30341	1.55261	NA	NA	5
HMGN2P46	NA	4.81254	NA	NA	2.46494	2.62689	3.0095	2.09707	5
ACHE	NA	2.01582	3.11673	1.60118	3.53794	1.30875	NA	NA	5
ANGPTL4	NA	2.32568	NA	1.40834	2.15816	1.5728	NA	1.01746	5
FOSB	NA	1.32868	4.07757	4.79481	2.54494	3.14511	NA	NA	5
FILIP1L	NA	1.46247	1.20813	3.44759	1.68096	1.62426	NA	NA	5
C11orf96	NA	2.97507	6.50376	6.86058	3.3553	3.02624	NA	NA	5
ARRDC3	NA	1.2706	3.48327	3.91597	3.94216	3.88009	NA	NA	5
NFKBIA	NA	NA	3.26015	5.26094	4.5843	4.08066	NA	1.22589	5
PTGS2	NA	NA	2.45273	2.15914	2.21567	3.25458	NA	1.44049	5
MAP3K8	NA	NA	1.98084	1.53192	3.82631	2.82597	1.06056	NA	5
GDF15	NA	NA	1.53094	2.18763	2.27639	1.30118	NA	2.17024	5
PDE4B	NA	NA	1.54686	2.20982	3.58611	3.81922	NA	2.33323	5
NEURL3	NA	NA	2.97113	4.06968	2.8345	2.46573	NA	1.56686	5
HDAC9	NA	NA	2.09343	3.32361	1.35813	2.29394	NA	1.20551	5
TNF	NA	NA	7.73056	4.61667	7.05115	7.71334	1.80554	NA	5
HLA-F	NA	NA	1.53421	3.58356	3.77255	1.60737	NA	1.67123	5
DEPDC7	NA	NA	1.22904	1.26982	1.23124	2.11585	NA	-1.11838	5
IFITM2	NA	NA	1.60768	1.38746	4.75339	2.64995	NA	1.04657	5
LIF	NA	NA	NA	2.81731	1.1767	1.83765	1.30698	1.81844	5
TNFAIP2	NA	NA	NA	1.1443	1.92926	3.21515	1.5489	1.05557	5
RND1	NA	NA	NA	2.11631	3.42435	2.84104	1.51622	1.89392	5
MX2	NA	NA	NA	6.17782	4.88718	5.37506	2.22238	3.71798	5
TYMP	NA	NA	NA	1.26758	3.00635	2.00263	1.03992	1.31614	5
CYP4F3	NA	NA	NA	-1.79513	-1.13993	-1.14753	-1.07438	-1.16019	5
EPSTI1	NA	NA	NA	4.80151	4.14928	4.23222	1.04448	1.81948	5
GBP5	NA	NA	NA	2.51799	10.5292	6.17334	1.83397	2.26738	5
PARP9	2.07281	NA	NA	2.75429	1.85916	2.45083	NA	NA	4
STAT1	1.32301	NA	NA	1.54561	1.99211	2.5207	NA	NA	4
DTX3L	1.37822	NA	NA	1.96807	2.2374	2.55418	NA	NA	4
TRIM14	1.14156	NA	NA	1.91823	1.58482	1.97568	NA	NA	4
PLSCR1	1.07762	NA	NA	2.45288	1.08079	1.27773	NA	NA	4
EIF2AK2	1.23311	NA	NA	1.59065	1.41223	2.14314	NA	NA	4
SP110	1.27871	NA	NA	3.76192	2.42889	2.77682	NA	NA	4
PARP10	1.91144	NA	NA	4.42462	2.92954	2.09393	NA	NA	4
REC8	1.38564	NA	NA	3.12421	1.32956	1.64417	NA	NA	4
SAMD9	1.67506	NA	NA	3.8539	3.10128	2.87808	NA	NA	4
STC2	NA	4.01434	NA	NA	1.46241	2.73076	NA	1.71529	4
SAT1	NA	1.97499	NA	1.11399	1.74892	1.62449	NA	NA	4
C1S	NA	1.58313	1.5872	NA	3.15805	1.72979	NA	NA	4
DDIT3	NA	2.5158	3.55127	3.23285	1.72831	NA	NA	NA	4
CD55	NA	1.61553	NA	1.501	1.387	1.00719	NA	NA	4
KIF20A	NA	-1.77791	1.20247	NA	-1.68001	-1.69175	NA	NA	4
OPTN	NA	1.47917	NA	1.09708	2.32533	2.00367	NA	NA	4
EBP	NA	-1.6106	-1.05781	-1.52303	NA	-1.48997	NA	NA	4
PHB	NA	-1.33722	-1.08718	-2.50666	NA	-1.47382	NA	NA	4
SLC9A3R1	NA	-1.65541	-1.21351	-1.71726	NA	-1.54248	NA	NA	4
SCARA3	NA	-1.37049	-1.05466	-1.55672	NA	-1.79106	NA	NA	4
ETS2	NA	-1.28877	NA	2.54317	2.17998	1.75334	NA	NA	4
GFPT2	NA	1.60581	NA	NA	4.63892	2.65284	NA	2.19154	4
NT5DC2	NA	-1.58836	NA	-1.96841	-1.22535	-1.59313	NA	NA	4
LSS	NA	-1.57975	-1.08463	NA	-1.15158	-1.70916	NA	NA	4
PCSK9	NA	-2.01193	NA	-1.57575	-1.27134	-1.69221	NA	NA	4
KLF6	NA	1.23258	NA	2.73595	2.18215	2.65484	NA	NA	4
ADM2	NA	4.57433	NA	NA	1.45882	1.98611	NA	1.15652	4
SAMD4A	NA	1.67936	NA	1.08061	1.10637	1.80548	NA	NA	4
VAV3	NA	-2.00279	NA	-1.4405	-1.2634	-1.28675	NA	NA	4
MAP2K6	NA	-1.97853	NA	-1.4725	NA	-1.09914	NA	-1.38635	4
TRAF1	NA	1.75084	NA	2.26464	4.43356	4.73117	NA	NA	4
NCOA7	NA	1.11595	NA	1.41723	2.67765	3.03373	NA	NA	4
RND3	NA	1.29912	NA	1.61432	1.29353	1.95811	NA	NA	4
AKAP12	NA	1.59931	NA	1.1185	NA	2.30783	NA	1.00511	4
TXNIP	NA	5.54208	1.68129	NA	2.47769	3.40266	NA	NA	4
DUSP1	NA	1.02704	NA	2.28791	3.25424	3.5224	NA	NA	4
CHAC1	NA	2.42228	NA	NA	3.44226	3.02342	NA	2.24948	4
NPTX1	NA	-1.13691	NA	2.46588	6.11456	2.10364	NA	NA	4
NCALD	NA	-2.67438	NA	-1.27273	6.62036	2.03829	NA	NA	4
UCP2	NA	-1.1837	NA	-2.28734	-2.83553	-1.46142	NA	NA	4
NAV3	NA	1.45576	NA	1.46788	1.40108	2.28622	NA	NA	4
EMP2	NA	-1.14236	NA	-1.05264	-1.11545	-1.10084	NA	NA	4
IL11	NA	1.47406	NA	2.67597	2.75314	1.45787	NA	NA	4
PRADC1	NA	-1.9925	NA	-1.20793	-1.1651	-1.44601	NA	NA	4
LMNB1	NA	-1.08598	NA	-1.07684	NA	-1.22051	NA	-1.09867	4
FOSL1	NA	1.64531	NA	2.87235	1.3086	1.47605	NA	NA	4
METTL7B	NA	-1.77049	NA	-2.37099	-1.279	-1.88531	NA	NA	4
TAF1D	NA	1.59494	1.47619	2.1878	NA	1.13598	NA	NA	4
DDX60L	NA	1.21234	NA	2.86476	3.0709	3.76621	NA	NA	4
ADI1	NA	-1.13559	-1.06384	-2.084	NA	-1.39607	NA	NA	4
SDC4	NA	1.18619	NA	1.52264	1.24302	1.31959	NA	NA	4
ZNF185	NA	1.22789	-1.58345	-1.04146	NA	1.11704	NA	NA	4
NSDHL	NA	-1.01244	-1.0953	-1.60703	NA	-1.56191	NA	NA	4
IFT122	NA	-1.14659	NA	-1.40273	-1.27991	-1.70157	NA	NA	4
N4BP3	NA	2.59839	2.05122	3.32691	NA	1.37268	NA	NA	4
HGD	NA	-1.44967	NA	-1.60902	-1.26976	NA	NA	1.07828	4
NRGN	NA	-2.55925	NA	-3.75453	-1.18312	-1.51744	NA	NA	4
ALDH1A3	NA	1.16798	NA	-1.77765	NA	1.34425	NA	1.00412	4
APOL6	NA	1.4186	NA	2.16612	3.79835	3.19771	NA	NA	4
GALM	NA	-1.05422	NA	-1.47629	-1.2595	-1.13577	NA	NA	4
TUBB4A	NA	-1.58115	-1.49058	-2.57545	-1.55498	NA	NA	NA	4
KIF12	NA	-1.41525	NA	NA	-1.35791	-1.58079	NA	1.11524	4
BCAS1	NA	-3.0666	-1.57448	-3.81361	-2.30195	NA	NA	NA	4
XDH	NA	1.69703	NA	NA	1.10871	1.06225	NA	1.87272	4
SLC1A4	NA	1.18561	-1.3838	-1.13392	NA	1.48268	NA	NA	4
SLC16A6	NA	2.91597	1.89933	NA	4.78203	3.3763	NA	NA	4
ANXA13	NA	-1.31122	NA	-2.4083	-4.76818	-2.85948	NA	NA	4
ARRDC4	NA	2.84446	1.42739	NA	1.39991	2.30645	NA	NA	4
KLF9	NA	1.46026	1.30648	1.248	NA	2.55646	NA	NA	4
EFNA1	NA	1.23068	4.01244	4.70031	NA	1.5342	NA	NA	4
TREX1	NA	-1.53055	NA	1.36124	2.18853	1.41564	NA	NA	4
NFIL3	NA	1.12262	2.46714	4.27148	1.04148	NA	NA	NA	4
RUNX2	NA	2.33003	NA	2.10899	2.84124	3.98525	NA	NA	4
GBP3	NA	1.41797	NA	1.32425	2.186	1.69155	NA	NA	4
SERTAD2	NA	1.11307	2.14773	3.4335	NA	1.69591	NA	NA	4
CREB5	NA	1.87837	NA	3.5978	3.36191	2.7152	NA	NA	4
TNFAIP8	NA	1.08321	1.23422	2.50543	NA	1.21042	NA	NA	4
TNFSF15	NA	-1.73637	NA	-2.24067	2.57164	1.62742	NA	NA	4
RAB26	NA	-1.50819	NA	-2.68329	-3.11912	-2.02874	NA	NA	4
FGFR3	NA	-2.01786	NA	-2.48075	-1.52756	-1.64256	NA	NA	4
SLC22A18AS	NA	-1.84399	NA	-1.5831	-1.20478	-1.69506	NA	NA	4
GPT2	NA	1.06096	-1.27248	NA	1.31502	1.13496	NA	NA	4
FOXO1	NA	1.24619	NA	2.4953	1.66578	1.75434	NA	NA	4
LACC1	NA	1.27132	1.03358	1.12864	NA	1.22987	NA	NA	4
PHF11	NA	1.27016	NA	2.06913	1.91993	2.21248	NA	NA	4
LYST	NA	1.23947	NA	1.4937	1.08379	1.07676	NA	NA	4
IL15RA	NA	1.9399	NA	2.3167	2.66509	2.04652	NA	NA	4
RBM43	NA	1.04603	NA	1.02183	1.15144	2.26797	NA	NA	4
TBXAS1	NA	-1.1692	-1.7035	-1.40809	NA	NA	NA	1.59499	4
ZNF697	NA	1.20337	NA	1.34525	1.86471	1.13367	NA	NA	4
TPPP3	NA	-2.07517	NA	-2.80212	-2.13498	-1.44516	NA	NA	4
SENP7	NA	1.09886	1.36323	1.97651	NA	1.35241	NA	NA	4
PROC	NA	-1.41443	-1.42917	NA	NA	-1.65282	NA	-1.05167	4
TTBK2	NA	1.22539	1.17412	1.09393	NA	1.2764	NA	NA	4
ZNF805	NA	1.21983	1.94291	2.28084	NA	1.06569	NA	NA	4
CSF2RA	NA	1.46853	NA	-1.07361	1.00812	1.00941	NA	NA	4
ADH6	NA	-4.13504	NA	-4.00796	-4.73325	-1.95302	NA	NA	4
NEURL1B	NA	-1.01167	NA	-1.26154	-2.99189	1.1663	NA	NA	4
CEACAM1	NA	-1.24097	NA	1.23655	2.96587	1.16819	NA	NA	4
HIST1H2BJ	NA	-2.10728	1.37689	1.15047	NA	-1.28857	NA	NA	4
KLF2	NA	1.11711	NA	1.39692	2.51035	1.02054	NA	NA	4
ABCA12	NA	-1.36225	NA	-1.42025	NA	1.2084	NA	1.06195	4
PPM1K	NA	1.66252	NA	3.30266	3.30707	2.19392	NA	NA	4
KCNJ16	NA	-2.04891	1.07086	-2.34739	NA	NA	NA	-3.08942	4
CX3CL1	NA	1.30676	NA	1.75488	4.66537	3.11524	NA	NA	4
CD274	NA	1.38565	NA	4.23091	5.14178	5.20539	NA	NA	4
GCNT4	NA	1.82852	NA	1.07441	1.42487	1.48917	NA	NA	4
FLT3LG	NA	1.14855	NA	2.90241	2.53127	2.34721	NA	NA	4
PARP8	NA	2.95766	NA	1.43205	1.43197	1.39942	NA	NA	4
CRYM	NA	-1.35001	NA	1.40747	-1.93457	-1.97653	NA	NA	4
AIF1L	NA	-1.15356	NA	-1.65708	-1.17858	-1.54367	NA	NA	4
PSG4	NA	1.54017	-1.7125	-1.72884	NA	1.3569	NA	NA	4
EGOT	NA	3.08512	NA	4.85654	3.0598	3.41532	NA	NA	4
LST1	NA	3.5629	NA	3.67145	7.35428	6.91703	NA	NA	4
SAA1	NA	1.69513	NA	NA	2.06159	NA	2.22133	2.09611	4
BHLHE41	NA	1.66072	5.11155	5.63378	NA	1.56844	NA	NA	4
ZNF385C	NA	1.53803	NA	NA	2.00669	1.92955	NA	2.29426	4
CYP1A1	NA	2.42499	NA	4.93975	4.43742	6.08769	NA	NA	4
SERPINA10	NA	-5.43233	NA	6.90234	6.96312	6.4602	NA	NA	4
CEBPD	NA	-1.08058	1.44679	1.29123	1.13597	NA	NA	NA	4
STX11	NA	1.2353	NA	2.21743	4.9644	2.90994	NA	NA	4
KCNT2	NA	1.43481	NA	1.97141	1.7104	2.26388	NA	NA	4
CFI	NA	-1.81556	1.67532	-2.0648	-1.64649	NA	NA	NA	4
SELE	NA	4.17655	7.68328	6.07259	NA	5.74641	NA	NA	4
PTAFR	NA	1.43984	NA	NA	2.2591	3.01567	NA	1.18299	4
PTGER4	NA	-1.22694	NA	1.42671	3.26923	2.54905	NA	NA	4
ERRFI1	NA	1.48468	NA	1.56717	1.02445	1.61483	NA	NA	4
TNFRSF1B	NA	1.69325	NA	NA	2.9876	1.62259	NA	4.14256	4
PDCD1LG2	NA	3.28121	NA	NA	6.51764	4.54679	NA	1.24229	4
TLR2	NA	2.11032	NA	1.68292	1.34011	NA	1.04862	NA	4
TSPAN8	NA	-2.76888	-1.35749	-1.96821	-1.4718	NA	NA	NA	4
C6orf223	NA	-1.40842	NA	NA	NA	1.33294	1.15403	1.46632	4
BACH2	NA	1.92423	NA	2.0942	3.1481	2.22304	NA	NA	4
KLHDC7B	NA	3.54271	NA	NA	5.24086	3.66182	NA	1.36681	4
SUGT1P1	NA	1.02306	NA	3.28616	2.40451	1.69726	NA	NA	4
PPM1E	NA	1.55346	5.0641	2.25549	NA	3.8115	NA	NA	4
RET	NA	-1.27482	NA	1.87211	5.50639	2.79476	NA	NA	4
PI3	NA	1.23917	NA	-1.45386	NA	NA	1.80241	1.44462	4
KBTBD8	NA	-1.25037	3.03696	1.93319	1.41171	NA	NA	NA	4
DUOX2	NA	1.55976	NA	2.46562	NA	4.34879	NA	1.49784	4
DLX2	NA	-2.28045	6.56022	3.76843	3.50561	NA	NA	NA	4
SLC5A5	NA	1.35102	NA	2.27184	NA	4.5428	NA	2.56494	4
C6orf58	NA	1.51028	2.51372	NA	4.83104	2.51304	NA	NA	4
JUNB	NA	NA	3.48926	3.6073	1.27662	1.41343	NA	NA	4
CCNL1	NA	NA	2.83233	3.84767	1.26095	1.61327	NA	NA	4
EGR1	NA	NA	9.63333	6.85642	2.19712	2.47326	NA	NA	4
NR1D1	NA	NA	4.23154	5.32076	1.26161	2.47609	NA	NA	4
BBC3	NA	NA	2.70727	2.69591	4.8897	2.82987	NA	NA	4
DUSP8	NA	NA	3.47219	4.49743	2.0727	2.08953	NA	NA	4
CLK1	NA	NA	2.41688	3.52068	1.0787	1.27369	NA	NA	4
BCL3	NA	NA	2.90782	2.5942	1.5659	2.06868	NA	NA	4
NFKBIZ	NA	NA	3.54788	4.05735	2.62486	2.03843	NA	NA	4
CHD2	NA	NA	1.73128	3.70022	1.48274	1.60519	NA	NA	4
ZBTB43	NA	NA	2.2015	3.91812	1.5681	1.94982	NA	NA	4
NFKBIE	NA	NA	3.18338	4.02176	1.65352	1.13108	NA	NA	4
FRS2	NA	NA	2.19783	3.0631	1.52211	1.84871	NA	NA	4
ARID4B	NA	NA	1.98423	2.34238	1.19689	1.36597	NA	NA	4
PNRC1	NA	NA	1.77765	2.09225	1.65623	1.98358	NA	NA	4
FOS	NA	NA	3.02315	2.32558	2.91119	1.20235	NA	NA	4
RSRC2	NA	NA	1.97657	3.15808	1.37685	1.33555	NA	NA	4
ZNF292	NA	NA	2.14796	2.89655	1.07974	1.61972	NA	NA	4
ZNF436	NA	NA	2.28153	3.10907	1.00048	1.32304	NA	NA	4
IRF1	NA	NA	2.29308	3.10445	3.83989	3.51296	NA	NA	4
CSRNP1	NA	NA	2.46143	4.12164	2.91447	2.52994	NA	NA	4
ZBTB21	NA	NA	2.062	3.20292	1.44077	1.56099	NA	NA	4
CYLD	NA	NA	2.03882	2.90457	2.35555	1.90642	NA	NA	4
RLF	NA	NA	2.14964	3.63969	1.10906	1.01675	NA	NA	4
EGR2	NA	NA	5.2125	6.02602	3.27939	3.09099	NA	NA	4
PPP1R10	NA	NA	1.35493	2.84841	1.1428	NA	NA	3.37168	4
NFAT5	NA	NA	1.46548	1.56628	1.15178	1.40048	NA	NA	4
PPP1R15B	NA	NA	1.59928	2.30273	1.12949	1.38276	NA	NA	4
CPEB2	NA	NA	1.52218	1.40002	2.15558	1.36411	NA	NA	4
INO80D	NA	NA	2.17284	2.06639	1.46642	1.25057	NA	NA	4
BTG2	NA	NA	1.42648	2.06293	1.22745	1.26958	NA	NA	4
ZNF267	NA	NA	2.17556	3.53525	1.41594	2.06057	NA	NA	4
COL4A1	NA	NA	-1.59418	-1.21691	7.29796	6.58996	NA	NA	4
CPEB4	NA	NA	1.43211	1.54349	1.57292	1.57898	NA	NA	4
NFKB2	NA	NA	1.32845	2.62221	2.05764	1.3505	NA	NA	4
ICAM5	NA	NA	3.78406	4.51484	2.32134	1.45854	NA	NA	4
INTS6	NA	NA	1.68569	2.3944	1.07838	1.12849	NA	NA	4
CEP350	NA	NA	1.35339	1.56981	1.1374	1.05671	NA	NA	4
REL	NA	NA	2.94146	3.19793	1.65996	1.98293	NA	NA	4
FST	NA	NA	2.65739	1.12467	3.23328	1.31887	NA	NA	4
NFKB1	NA	NA	1.87347	3.22321	1.2012	1.51953	NA	NA	4
CSF1	NA	NA	1.54375	1.57164	3.02634	2.53163	NA	NA	4
ARL5B	NA	NA	1.59326	3.28367	1.79665	1.79456	NA	NA	4
SIX4	NA	NA	2.61476	2.94618	1.05124	1.22896	NA	NA	4
HIVEP2	NA	NA	1.64391	2.65616	2.42148	2.63223	NA	NA	4
GPCPD1	NA	NA	1.13215	2.02716	1.77163	1.70648	NA	NA	4
ZFP36	NA	NA	3.19212	3.47872	3.06388	2.94574	NA	NA	4
EPC1	NA	NA	1.29974	2.51591	1.48961	1.38042	NA	NA	4
TSC22D2	NA	NA	1.29993	1.4083	1.24843	1.44811	NA	NA	4
MAST4	NA	NA	1.64422	1.32265	1.69379	2.18555	NA	NA	4
GEM	NA	NA	1.69958	4.15522	1.89828	1.60281	NA	NA	4
TET2	NA	NA	1.59099	2.00014	1.3788	1.38569	NA	NA	4
CLUHP3	NA	NA	2.64142	3.92316	1.61709	1.45018	NA	NA	4
BCL10	NA	NA	1.48441	2.61997	1.11495	1.20307	NA	NA	4
ZNF92	NA	NA	1.87194	1.80124	1.90271	1.22454	NA	NA	4
ABL2	NA	NA	1.16091	2.58663	1.12943	1.42392	NA	NA	4
PARD6B	NA	NA	1.57864	1.24342	1.08202	1.93401	NA	NA	4
KDM6A	NA	NA	1.08393	1.75744	2.15094	1.31521	NA	NA	4
SMCHD1	NA	NA	1.24529	2.02843	1.34011	1.16838	NA	NA	4
PIM3	NA	NA	1.3569	1.95142	1.13707	1.43884	NA	NA	4
CD83	NA	NA	2.34418	2.08023	1.31675	NA	NA	1.33101	4
TLK2	NA	NA	1.02056	2.03541	1.23925	1.21585	NA	NA	4
CNOT4	NA	NA	1.18603	2.03872	1.01659	1.01634	NA	NA	4
ATAD2B	NA	NA	1.2001	1.38267	1.16835	1.16162	NA	NA	4
PPP4R4	NA	NA	7.8866	5.5967	3.97231	3.42425	NA	NA	4
PPARGC1A	NA	NA	1.02747	1.50424	1.48195	NA	-1.04673	NA	4
DYRK1A	NA	NA	1.00798	1.28538	1.1127	1.06796	NA	NA	4
CLK4	NA	NA	1.24418	2.10997	1.17707	1.6169	NA	NA	4
ZNF627	NA	NA	1.71643	2.70288	1.62269	1.5817	NA	NA	4
BDKRB2	NA	NA	1.11408	2.10124	3.4733	2.79855	NA	NA	4
ETV3	NA	NA	1.54422	2.2144	1.76504	1.92385	NA	NA	4
SRFBP1	NA	NA	1.13746	2.55839	1.21726	1.41564	NA	NA	4
TICAM1	NA	NA	1.33165	2.04391	1.51191	1.48413	NA	NA	4
EGR3	NA	NA	7.05342	2.68259	3.41251	2.09677	NA	NA	4
SLCO5A1	NA	NA	4.68253	3.31418	3.61461	2.81546	NA	NA	4
ARL14	NA	NA	1.21212	3.89181	1.52944	NA	NA	-1.08349	4
FGF18	NA	NA	3.85414	4.03786	3.34788	2.03903	NA	NA	4
HIST1H4E	NA	NA	2.27348	3.08993	2.36189	2.19721	NA	NA	4
ZNF254	NA	NA	1.01414	1.23163	1.05062	1.59138	NA	NA	4
MIPEP	NA	NA	-1.08832	-1.60161	-1.00641	-1.07108	NA	NA	4
CENPA	NA	NA	1.94636	2.2875	NA	-1.38704	NA	-1.16072	4
PRDM1	NA	NA	1.53389	2.00097	4.71528	3.52596	NA	NA	4
ODF3B	NA	NA	1.67703	1.77736	2.11694	1.0967	NA	NA	4
LIG4	NA	NA	1.01716	1.26234	1.00165	1.27714	NA	NA	4
NGFR	NA	NA	4.70294	1.86297	6.0515	2.33832	NA	NA	4
ZSCAN12	NA	NA	1.53715	1.90237	1.07928	1.00618	NA	NA	4
LGALS9	NA	NA	1.51259	2.94952	3.18026	2.4749	NA	NA	4
JAK2	NA	NA	1.51685	1.84598	3.08258	2.08248	NA	NA	4
RCAN1	NA	NA	1.21039	1.52105	1.95583	1.76717	NA	NA	4
PELI1	NA	NA	1.09349	1.00719	1.97203	1.89087	NA	NA	4
BTN2A2	NA	NA	1.04136	1.4818	1.86432	1.06911	NA	NA	4
TNFSF14	NA	NA	3.60732	NA	NA	2.74908	1.99141	1.20881	4
GATM	NA	NA	-1.01623	-2.91963	NA	-1.74132	NA	-1.01487	4
HOGA1	NA	NA	-1.3674	-1.71643	-1.55622	-2.09686	NA	NA	4
ARL4D	NA	NA	1.12638	1.69638	1.23345	1.75389	NA	NA	4
PROX1	NA	NA	3.59032	3.60553	7.34252	2.19563	NA	NA	4
KCNN1	NA	NA	3.91809	3.79126	8.50916	3.88518	NA	NA	4
ZBTB20	NA	NA	1.78465	3.34405	1.84185	3.4413	NA	NA	4
RASGRP3	NA	NA	-1.41987	2.44299	4.63265	3.46946	NA	NA	4
USP43	NA	NA	1.07935	3.64564	1.95418	1.27494	NA	NA	4
MATN1-AS1	NA	NA	2.02587	1.8264	1.78605	1.1725	NA	NA	4
ZNF222	NA	NA	1.39725	2.15187	1.59734	1.18897	NA	NA	4
COL11A2	NA	NA	1.25769	1.68517	3.48756	1.24943	NA	NA	4
HELB	NA	NA	1.71875	1.34745	1.6379	1.65461	NA	NA	4
B3GNT7	NA	NA	2.25276	1.81282	2.35824	1.77144	NA	NA	4
CYP27A1	NA	NA	2.47752	3.00661	-1.88204	NA	NA	2.5672	4
CDC14A	NA	NA	1.57217	1.84408	1.82738	1.91216	NA	NA	4
HCP5	NA	NA	1.85203	1.41466	4.21192	1.37695	NA	NA	4
ZNF543	NA	NA	1.55307	1.93657	1.46719	1.44001	NA	NA	4
ANKRD18B	NA	NA	1.17791	1.04991	1.04982	1.15753	NA	NA	4
CTDSPL	NA	NA	-1.0582	-1.32471	-1.0319	-1.04669	NA	NA	4
XKR9	NA	NA	2.70046	NA	3.45286	3.54208	NA	1.26926	4
HERC5	NA	NA	NA	3.88563	4.65708	3.38749	NA	2.552	4
C5	NA	NA	NA	-2.07391	-1.75513	-1.36176	NA	-1.05947	4
USP18	NA	NA	NA	3.7273	4.36493	3.90125	NA	1.31224	4
IFITM3	NA	NA	NA	2.85545	3.12106	1.34274	NA	1.11385	4
STAT5A	NA	NA	NA	2.42192	1.69662	1.8782	1.11984	NA	4
PSMB9	NA	NA	NA	2.17998	3.30323	1.55918	1.01496	NA	4
ISG20	NA	NA	NA	1.98267	4.9112	3.03076	NA	1.07865	4
BMP2	NA	NA	NA	2.06341	2.14263	2.23826	NA	1.39602	4
HSH2D	NA	NA	NA	4.74726	2.6638	2.61386	NA	1.19516	4
RSAD2	NA	NA	NA	7.13953	5.90704	5.11137	NA	3.99181	4
SNAI1	NA	NA	NA	2.60488	2.48939	1.29251	NA	2.01866	4
SOCS1	NA	NA	NA	5.0713	3.92677	2.01355	NA	1.03096	4
IDO1	NA	NA	NA	4.0631	6.73679	4.16817	NA	2.02445	4
LMO2	NA	NA	NA	4.37207	4.20444	3.4388	NA	-1.15593	4
GATA3	NA	NA	NA	1.42784	2.18508	1.89723	NA	-1.08727	4
RERG	NA	NA	NA	-2.18255	-2.08701	-1.62674	NA	-1.74405	4
CXCL11	NA	NA	NA	5.95849	8.0921	6.07497	NA	3.74849	4
G0S2	NA	NA	NA	1.62246	3.03599	3.77433	NA	2.25436	4
MMP13	NA	NA	NA	5.22185	5.37889	5.40722	1.09268	NA	4
SLC1A3	NA	NA	NA	5.56965	4.83845	1.59085	NA	-1.81109	4
IL4I1	NA	NA	NA	2.61911	2.85635	1.9028	NA	1.89117	4
ZBP1	NA	NA	NA	3.57427	6.92005	6.2434	NA	4.22291	4
CXCL10	NA	NA	NA	3.46544	8.74448	6.08044	NA	3.03417	4
KMO	NA	NA	NA	1.57162	4.34387	5.16656	NA	1.4669	4
SLC15A3	NA	NA	NA	4.23749	5.8931	4.24595	NA	1.22764	4
CH25H	NA	NA	NA	5.54827	9.9518	7.81857	NA	-1.31633	4
TNIP1	NA	NA	NA	NA	1.03316	1.2484	1.26359	1.29018	4
METTL7A	NA	NA	NA	NA	-3.24739	-3.11054	-1.03652	-1.22677	4
LAMC2	NA	3.70377	-1.8607	NA	NA	NA	NA	1.52255	3
FASN	NA	-2.25928	NA	-1.3782	NA	-1.55703	NA	NA	3
KRT8	NA	-2.2336	NA	-1.52163	NA	-1.07716	NA	NA	3
MCM5	NA	-2.39154	NA	-2.31912	NA	-1.71127	NA	NA	3
TK1	NA	-2.23185	-1.10837	-2.18366	NA	NA	NA	NA	3
ASNS	NA	3.15197	NA	NA	1.48159	2.92061	NA	NA	3
RECQL4	NA	-2.4261	NA	-1.34314	NA	-1.57606	NA	NA	3
TMEM156	NA	2.39116	NA	1.16516	NA	1.20306	NA	NA	3
MTHFD2	NA	2.16926	NA	NA	NA	1.94667	NA	1.10752	3
RRM2	NA	-1.97548	NA	-2.16971	NA	-1.08342	NA	NA	3
FEN1	NA	-2.1371	NA	-1.24138	NA	-1.12777	NA	NA	3
SLFN5	NA	2.54083	NA	NA	2.4363	2.91845	NA	NA	3
MCM4	NA	-1.86291	NA	-1.39017	NA	-1.15616	NA	NA	3
TUBB4B	NA	-1.71253	NA	-1.00186	NA	-1.33528	NA	NA	3
SLC25A10	NA	-2.43958	NA	-2.64598	NA	-1.82745	NA	NA	3
BCAT1	NA	2.41198	NA	-1.52366	NA	2.72438	NA	NA	3
ZWINT	NA	-1.78314	NA	-1.89515	NA	-1.18558	NA	NA	3
POLR2L	NA	-1.88644	NA	-1.84819	NA	-1.35343	NA	NA	3
WDR34	NA	-1.56928	NA	-1.58952	NA	-1.72998	NA	NA	3
IER5L	NA	-1.63241	1.13796	NA	NA	-1.01289	NA	NA	3
SPDEF	NA	-3.46239	NA	NA	-1.27263	-1.39884	NA	NA	3
ETS1	NA	1.80912	NA	2.01715	NA	1.78128	NA	NA	3
FRMD6	NA	1.91085	NA	1.05507	NA	1.49677	NA	NA	3
ACAT2	NA	-1.69233	NA	NA	-1.26966	-1.79647	NA	NA	3
TUBA1B	NA	-1.45786	NA	-1.62488	NA	-1.18482	NA	NA	3
KIF18B	NA	-1.61763	NA	NA	NA	-1.16647	NA	-1.00359	3
AGR2	NA	-1.53489	-1.16989	-2.64836	NA	NA	NA	NA	3
SLC25A37	NA	1.63893	NA	1.16716	NA	1.32417	NA	NA	3
SLC6A15	NA	2.52446	1.57033	1.43935	NA	NA	NA	NA	3
GINS2	NA	-1.84212	NA	-1.83492	NA	-1.58699	NA	NA	3
LRRC45	NA	-2.06802	NA	-1.429	NA	-2.44799	NA	NA	3
PLAU	NA	1.70313	NA	NA	NA	1.23715	NA	1.73741	3
USP53	NA	1.66405	NA	1.26054	NA	1.21451	NA	NA	3
THEM6	NA	-1.74382	NA	-1.78957	NA	-1.47297	NA	NA	3
SNHG1	NA	1.65681	1.19302	2.10461	NA	NA	NA	NA	3
NT5E	NA	1.76069	NA	NA	1.14269	NA	NA	1.6715	3
ASF1B	NA	-2.00523	NA	-1.49299	NA	-1.22577	NA	NA	3
ACTN4	NA	-1.2519	-1.02911	-1.47089	NA	NA	NA	NA	3
SAPCD2	NA	-1.79909	NA	-1.25642	NA	-1.98106	NA	NA	3
HSPA8	NA	-1.13934	NA	-1.07652	NA	-1.1087	NA	NA	3
NIPAL4	NA	1.86967	NA	2.25025	NA	1.03946	NA	NA	3
TACC3	NA	-1.42497	NA	-1.03023	NA	-1.15123	NA	NA	3
CSGALNACT2	NA	1.65929	1.28221	1.36841	NA	NA	NA	NA	3
MCM3	NA	-1.49745	NA	-1.10975	NA	-1.01019	NA	NA	3
CLDN2	NA	-2.10315	NA	-2.77195	NA	-3.58468	NA	NA	3
BIRC5	NA	-1.31857	NA	-1.08785	NA	-1.37006	NA	NA	3
EPB41L4A-AS1	NA	1.86389	NA	1.75601	NA	1.19507	NA	NA	3
BMPER	NA	2.50981	NA	2.21026	NA	4.90719	NA	NA	3
MCM6	NA	-1.64007	NA	-1.96795	NA	-1.38663	NA	NA	3
PGP	NA	-1.88641	NA	-1.60764	NA	-1.75724	NA	NA	3
TM4SF20	NA	-1.46623	1.28702	-1.60068	NA	NA	NA	NA	3
ABCA1	NA	2.09436	NA	NA	1.47907	1.49886	NA	NA	3
PDZK1IP1	NA	1.73411	NA	NA	NA	NA	2.42861	1.25958	3
CDCA3	NA	-1.57315	NA	NA	-1.26032	-1.56018	NA	NA	3
PSAT1	NA	1.73193	NA	-2.07877	NA	1.80685	NA	NA	3
CCBE1	NA	2.49883	NA	1.02057	NA	1.68237	NA	NA	3
SDF2L1	NA	-2.045	NA	-1.22597	NA	-1.86123	NA	NA	3
DBI	NA	-1.46572	NA	-1.12964	NA	-1.43855	NA	NA	3
MXD3	NA	-2.24522	NA	2.38404	NA	-2.42625	NA	NA	3
TBCD	NA	-1.25571	NA	-1.24128	NA	-1.27473	NA	NA	3
SNRNP25	NA	-1.68224	NA	-1.68308	NA	-2.13017	NA	NA	3
CHTF18	NA	-1.90361	NA	-2.054	NA	-1.20196	NA	NA	3
THOC3	NA	-1.37023	NA	-1.98161	NA	-1.04557	NA	NA	3
HLA-DMB	NA	-2.88884	NA	-1.69728	1.60712	NA	NA	NA	3
HSPBP1	NA	-1.36941	NA	-1.52595	NA	-1.19039	NA	NA	3
ESPL1	NA	-1.38515	NA	1.61238	NA	-1.16247	NA	NA	3
DHFR	NA	-1.53472	NA	-1.66699	-1.24622	NA	NA	NA	3
PLK1	NA	-1.31098	NA	2.09012	NA	-1.40897	NA	NA	3
CDKN2C	NA	-2.3004	NA	1.00203	NA	-1.26476	NA	NA	3
UHRF1	NA	-1.69944	NA	-1.88429	NA	-1.04351	NA	NA	3
ADPRM	NA	1.96461	NA	1.45086	NA	1.84657	NA	NA	3
AP1M2	NA	-1.64782	-1.29829	-1.82901	NA	NA	NA	NA	3
CLEC4E	NA	2.68127	NA	2.40533	NA	3.62122	NA	NA	3
PCYT2	NA	-1.55422	-1.05771	NA	NA	-1.87594	NA	NA	3
DHRS2	NA	2.96487	1.54811	NA	3.29885	NA	NA	NA	3
PFN1	NA	-1.29725	NA	-1.27226	NA	-1.45457	NA	NA	3
TECR	NA	-1.27599	-1.24723	-1.55595	NA	NA	NA	NA	3
NR1D2	NA	1.64092	NA	1.16396	NA	1.95011	NA	NA	3
CDC45	NA	-1.55974	NA	-1.16394	NA	-1.32602	NA	NA	3
L1CAM	NA	2.03145	NA	NA	NA	1.23344	NA	2.16509	3
CYP1B1	NA	1.61177	NA	NA	1.04879	2.78742	NA	NA	3
JMJD8	NA	-1.31033	NA	-1.02661	NA	-1.19286	NA	NA	3
TMEM97	NA	-1.23037	NA	-1.65505	NA	-1.74212	NA	NA	3
LAMB3	NA	1.23657	-1.07291	NA	NA	1.09552	NA	NA	3
INHBE	NA	5.06977	NA	NA	2.34078	5.11031	NA	NA	3
UGCG	NA	1.78034	NA	1.39573	NA	1.72497	NA	NA	3
NCAPD2	NA	-1.07051	NA	NA	-1.07767	-1.27055	NA	NA	3
SHMT1	NA	-1.27076	NA	-1.70265	NA	-1.46455	NA	NA	3
EXO1	NA	-1.45192	NA	-1.08808	NA	NA	NA	-1.19594	3
NDUFB7	NA	-1.34891	NA	-1.81893	NA	-1.39512	NA	NA	3
AURKAIP1	NA	-1.40682	NA	-1.46585	NA	-1.20033	NA	NA	3
GLDC	NA	-1.21795	NA	-1.68389	NA	-1.06134	NA	NA	3
ANXA6	NA	-1.13296	NA	-1.76448	NA	NA	NA	1.5061	3
PKMYT1	NA	-1.30604	NA	-1.27516	NA	NA	NA	-1.1753	3
SESN2	NA	1.70059	NA	NA	1.52548	1.27165	NA	NA	3
GRB10	NA	1.65769	NA	1.13177	1.19711	NA	NA	NA	3
KLF11	NA	1.5023	NA	2.82225	NA	1.22735	NA	NA	3
SPR	NA	-1.15628	NA	-1.25857	NA	-1.02195	NA	NA	3
FCGBP	NA	-1.70774	-1.04075	-1.08637	NA	NA	NA	NA	3
TUFT1	NA	1.24938	NA	1.27881	NA	2.00242	NA	NA	3
NUBP2	NA	-1.36706	NA	-1.83124	NA	-1.25509	NA	NA	3
PDP1	NA	1.44736	NA	1.19872	NA	1.60167	NA	NA	3
CPM	NA	1.89879	-2.12414	NA	-1.50474	NA	NA	NA	3
SRGN	NA	1.1211	NA	NA	NA	2.09397	NA	1.40932	3
DTYMK	NA	-1.22306	NA	-1.3888	NA	-1.34204	NA	NA	3
NEDD4	NA	1.14101	NA	NA	1.39874	2.43425	NA	NA	3
ATP6V0E2	NA	-1.18936	NA	-2.10913	NA	-1.37903	NA	NA	3
SERPINB7	NA	2.97174	NA	NA	NA	2.79692	NA	1.47434	3
RASGRF2	NA	2.1829	NA	1.53509	NA	NA	NA	1.20923	3
AKR1C1	NA	-1.38818	NA	-1.63372	-1.1563	NA	NA	NA	3
ZNF277	NA	1.40368	NA	1.31816	NA	1.22176	NA	NA	3
SLC25A1	NA	-1.13246	NA	-1.49035	NA	-1.06998	NA	NA	3
INHBB	NA	-1.17774	NA	-1.74195	NA	NA	NA	-1.03808	3
NOC4L	NA	-1.23997	-1.07016	NA	NA	-1.10174	NA	NA	3
NEB	NA	-3.42323	NA	NA	-1.4441	-2.75305	NA	NA	3
AP2S1	NA	-1.08969	NA	-1.03812	NA	-1.06286	NA	NA	3
FBXO32	NA	1.50432	NA	2.01181	NA	1.3018	NA	NA	3
FGD6	NA	1.09632	NA	1.3661	NA	1.72621	NA	NA	3
G6PD	NA	-1.12261	-1.28608	-3.00477	NA	NA	NA	NA	3
NTHL1	NA	-1.2965	NA	-1.64374	NA	-1.43862	NA	NA	3
BTG1	NA	1.38544	1.17872	2.76509	NA	NA	NA	NA	3
SIVA1	NA	-1.4273	NA	-1.7708	NA	-1.34439	NA	NA	3
WRAP53	NA	-1.25365	2.07867	2.46128	NA	NA	NA	NA	3
PLXND1	NA	-1.04686	NA	-1.16238	-1.31303	NA	NA	NA	3
WFS1	NA	-1.21415	NA	-1.5935	NA	-1.00564	NA	NA	3
PIN1	NA	-1.09294	NA	-1.61602	NA	-1.38343	NA	NA	3
NUDC	NA	-1.19984	NA	-1.10129	NA	-1.32067	NA	NA	3
CD320	NA	-1.10276	NA	-1.47416	NA	-1.2635	NA	NA	3
COMMD4	NA	-1.37686	NA	-1.46097	NA	-1.62891	NA	NA	3
ZFP36L2	NA	-1.12162	NA	NA	1.01625	1.11752	NA	NA	3
ALDH16A1	NA	-1.20424	NA	-1.68196	NA	-1.70606	NA	NA	3
MUC13	NA	-1.37103	NA	NA	2.62846	NA	NA	1.80954	3
PIF1	NA	-1.49572	NA	NA	-1.39831	-1.63556	NA	NA	3
HNRNPAB	NA	-1.06162	NA	-1.60317	NA	-1.22362	NA	NA	3
TBL3	NA	-1.03061	NA	-1.23307	NA	-1.20504	NA	NA	3
POLR2F	NA	-1.25069	NA	-1.77988	NA	-1.53242	NA	NA	3
ID3	NA	-1.01973	1.04401	NA	2.05725	NA	NA	NA	3
AHNAK	NA	1.09497	-1.11022	NA	-1.64772	NA	NA	NA	3
SYNGR3	NA	1.5795	NA	NA	NA	1.28906	NA	2.00272	3
METRN	NA	-1.21933	NA	-2.24376	NA	-1.03099	NA	NA	3
CACTIN	NA	-1.2023	1.32832	1.13652	NA	NA	NA	NA	3
UHRF1BP1	NA	1.08803	NA	NA	1.14911	1.7138	NA	NA	3
PDGFA	NA	1.24797	NA	NA	2.63677	1.40879	NA	NA	3
GBP2	NA	1.58615	NA	1.48852	NA	1.3359	NA	NA	3
VDR	NA	1.44403	1.43832	2.31507	NA	NA	NA	NA	3
KHK	NA	-1.34594	NA	-1.58725	NA	-1.40931	NA	NA	3
OGFRL1	NA	1.20536	NA	1.48679	NA	1.63017	NA	NA	3
THAP9-AS1	NA	1.24079	1.47466	2.12147	NA	NA	NA	NA	3
USH1C	NA	-1.62297	NA	-1.36584	-1.44661	NA	NA	NA	3
MCTP1	NA	1.43814	NA	2.50489	NA	1.09471	NA	NA	3
BACH1	NA	1.46363	NA	NA	1.23006	1.61983	NA	NA	3
SOX9	NA	-1.34929	NA	2.44229	NA	1.59519	NA	NA	3
PRKCE	NA	1.10483	NA	1.10423	NA	1.02164	NA	NA	3
NHP2	NA	-1.05586	NA	-1.53851	NA	-1.21303	NA	NA	3
TCP11L2	NA	1.69707	NA	1.28675	NA	1.8306	NA	NA	3
RBMS3	NA	2.3368	NA	NA	2.94191	2.30333	NA	NA	3
PYROXD1	NA	1.32621	NA	1.20273	NA	1.40281	NA	NA	3
JMY	NA	1.13335	NA	1.93718	NA	1.08915	NA	NA	3
AKR1B10	NA	-1.17102	NA	-2.87955	-1.41283	NA	NA	NA	3
MAP2	NA	2.1927	NA	NA	1.35235	1.059	NA	NA	3
BEAN1	NA	1.35222	NA	1.22667	NA	NA	NA	2.43413	3
PCSK1N	NA	-1.27107	NA	-1.15539	NA	-1.35119	NA	NA	3
CENPM	NA	-1.49777	NA	-2.35258	NA	-1.51399	NA	NA	3
DGCR6	NA	-1.44776	NA	-1.19528	NA	-1.02862	NA	NA	3
NPHS1	NA	1.63446	2.39898	2.17885	NA	NA	NA	NA	3
KATNB1	NA	-1.10278	NA	-1.8005	NA	-1.1021	NA	NA	3
ATAD3A	NA	-1.25198	NA	-1.1912	NA	-1.05951	NA	NA	3
FAM173A	NA	-1.27424	NA	-1.53448	NA	-1.83665	NA	NA	3
SNHG10	NA	-1.54238	2.00602	3.37921	NA	NA	NA	NA	3
DGCR6L	NA	-1.08246	NA	-1.87776	NA	-1.18013	NA	NA	3
SLC7A7	NA	-1.06116	NA	-1.32085	NA	NA	NA	1.66267	3
E2F2	NA	-1.6898	NA	NA	NA	-1.17755	NA	-1.20775	3
SYT1	NA	1.10291	NA	NA	2.87881	2.65972	NA	NA	3
RIOK3	NA	1.10827	NA	1.7642	NA	1.23908	NA	NA	3
KCTD17	NA	-1.24202	NA	-1.34873	NA	-1.04161	NA	NA	3
HRH1	NA	1.31496	NA	NA	1.48424	1.36955	NA	NA	3
MXD4	NA	-1.01936	NA	-2.13273	-1.12229	NA	NA	NA	3
ANKS4B	NA	-3.562	NA	NA	-1.63704	-1.6833	NA	NA	3
JUND	NA	-1.01599	1.12831	1.41927	NA	NA	NA	NA	3
ASB9	NA	-1.14475	NA	-2.23753	NA	-1.34599	NA	NA	3
MPV17L2	NA	-1.40225	NA	-1.96293	NA	-1.05247	NA	NA	3
TRAPPC5	NA	-1.20953	NA	-1.06521	NA	-1.3208	NA	NA	3
PKDCC	NA	-1.13871	NA	NA	-2.0255	-1.20511	NA	NA	3
LAGE3	NA	-1.04987	NA	-1.65588	NA	-1.6191	NA	NA	3
ROCK1P1	NA	3.72503	NA	2.25602	NA	3.21726	NA	NA	3
NDUFS7	NA	-1.02413	NA	-2.32015	NA	-1.12472	NA	NA	3
SAC3D1	NA	-1.01506	NA	-1.39038	NA	-1.7935	NA	NA	3
PCDHGC3	NA	-2.11463	-1.81564	-1.97035	NA	NA	NA	NA	3
AMBP	NA	-1.31898	-1.04733	-2.56151	NA	NA	NA	NA	3
DACT2	NA	-2.17871	NA	1.7988	NA	NA	NA	-1.03537	3
RABEP2	NA	-1.18669	NA	-1.23909	NA	-1.08306	NA	NA	3
ERN1	NA	1.04574	NA	NA	1.19177	1.963	NA	NA	3
DLG4	NA	1.02824	1.05158	NA	NA	1.08526	NA	NA	3
GCSH	NA	-1.10728	NA	-1.36981	NA	-1.41916	NA	NA	3
ZNF711	NA	1.10426	1.84389	1.60914	NA	NA	NA	NA	3
SEMA4G	NA	-1.1537	NA	-1.48909	-1.62053	NA	NA	NA	3
SGK2	NA	-1.36108	NA	-1.22039	NA	-1.40979	NA	NA	3
ROS1	NA	1.84283	NA	2.44766	-3.07803	NA	NA	NA	3
CCNE2	NA	-1.63847	NA	-1.45435	NA	NA	NA	-1.07157	3
COL22A1	NA	1.65276	NA	NA	1.04683	NA	NA	2.14845	3
HABP2	NA	-5.23252	-1.3721	-3.40759	NA	NA	NA	NA	3
NCF2	NA	1.43738	NA	NA	NA	1.57045	NA	1.03176	3
VEGFA	NA	1.89826	NA	1.89741	NA	1.47398	NA	NA	3
REPS2	NA	1.30157	NA	-1.40949	-1.73416	NA	NA	NA	3
EBI3	NA	1.27329	NA	NA	NA	1.10275	NA	2.56426	3
BMF	NA	1.03724	NA	2.21834	NA	1.0966	NA	NA	3
RAB40B	NA	-1.12481	NA	-1.84869	-1.15814	NA	NA	NA	3
SOX2	NA	-2.69119	1.35754	1.68345	NA	NA	NA	NA	3
ARHGAP33	NA	-1.13108	NA	1.07883	-1.51473	NA	NA	NA	3
ANKRD39	NA	-1.1803	NA	-1.44904	NA	-1.04333	NA	NA	3
CCDC74A	NA	-1.0489	NA	-1.88311	NA	-2.1398	NA	NA	3
NUPR1	NA	1.18238	NA	NA	2.91774	3.66058	NA	NA	3
C7orf31	NA	1.23281	NA	1.55361	1.13774	NA	NA	NA	3
HES7	NA	1.39521	1.7409	2.31896	NA	NA	NA	NA	3
MNS1	NA	-1.32815	NA	NA	-1.11592	-1.98086	NA	NA	3
STAT4	NA	1.0817	NA	NA	2.29668	1.8159	NA	NA	3
B9D2	NA	-1.09407	NA	-1.4354	NA	-1.4278	NA	NA	3
TTC39B	NA	1.15164	NA	NA	1.67584	1.74121	NA	NA	3
SLC16A9	NA	1.99813	NA	NA	3.8972	1.40194	NA	NA	3
PRR15L	NA	-3.12202	NA	-2.49189	NA	-1.25971	NA	NA	3
DNAAF3	NA	-1.26	NA	NA	-1.62849	-2.03969	NA	NA	3
CHRNB1	NA	1.13552	NA	1.06675	NA	1.1059	NA	NA	3
TNFAIP6	NA	1.3156	NA	1.46402	NA	1.04224	NA	NA	3
GOLT1A	NA	1.44863	NA	NA	NA	1.16087	NA	1.06621	3
DNAJB5	NA	-1.18724	NA	1.11311	1.20148	NA	NA	NA	3
TSPAN2	NA	1.66311	NA	NA	NA	1.48051	NA	1.2398	3
GATA6	NA	1.17022	NA	1.97919	NA	1.56175	NA	NA	3
TBX2	NA	-1.30981	1.5553	2.08902	NA	NA	NA	NA	3
CTXN1	NA	-1.47065	NA	NA	-1.02759	-1.89566	NA	NA	3
BCL11B	NA	-1.52654	1.54171	NA	NA	NA	NA	-1.19347	3
SWT1	NA	1.08634	NA	1.05334	NA	1.43155	NA	NA	3
NPR1	NA	-1.5839	NA	-1.51106	NA	3.13255	NA	NA	3
NPY1R	NA	-2.03152	1.18771	NA	NA	-1.01145	NA	NA	3
AGBL2	NA	1.23369	NA	1.50517	NA	NA	NA	-1.14642	3
B4GALNT2	NA	1.93818	NA	NA	-2.92344	NA	NA	2.14068	3
PTPRH	NA	1.12427	NA	NA	NA	1.1796	NA	1.4051	3
OXTR	NA	1.07007	-2.37111	NA	NA	1.10825	NA	NA	3
RASSF5	NA	-1.27346	1.22917	2.73016	NA	NA	NA	NA	3
EFNB3	NA	1.10418	2.04207	1.47136	NA	NA	NA	NA	3
CYS1	NA	1.05323	NA	NA	-3.15605	-1.68475	NA	NA	3
IGSF10	NA	-1.18667	NA	-1.86315	NA	NA	NA	-1.07074	3
MAML2	NA	1.00962	NA	1.5056	NA	1.23434	NA	NA	3
ITGB3	NA	2.93912	NA	1.58009	NA	NA	1.19768	NA	3
ACY3	NA	-2.03797	NA	-1.45228	1.68654	NA	NA	NA	3
LYNX1	NA	-1.06975	NA	-1.58422	NA	-1.4656	NA	NA	3
VIL1	NA	-3.86976	-1.77245	NA	NA	-1.52376	NA	NA	3
IL17RB	NA	-1.65736	NA	-1.5435	NA	-1.79573	NA	NA	3
DCTPP1	NA	-1.30482	NA	-1.81938	NA	-1.37865	NA	NA	3
ADORA2A	NA	1.22943	1.54585	NA	NA	1.91805	NA	NA	3
ELN	NA	-3.51047	NA	NA	NA	-1.43062	NA	-2.21309	3
MALL	NA	-1.57431	NA	-1.6445	NA	-1.48837	NA	NA	3
CD22	NA	2.08673	NA	NA	2.29075	1.98488	NA	NA	3
CNTNAP2	NA	-2.57594	NA	-3.82874	-1.8496	NA	NA	NA	3
SMIM4	NA	-1.06647	NA	-1.86099	NA	-1.06141	NA	NA	3
RPL13AP20	NA	1.59228	NA	1.47315	NA	1.67968	NA	NA	3
IGFBP1	NA	2.83154	2.1483	1.21336	NA	NA	NA	NA	3
ANK1	NA	-1.13366	-1.17599	-2.13601	NA	NA	NA	NA	3
ZNF426	NA	1.5515	NA	1.44101	NA	1.242	NA	NA	3
REEP1	NA	-1.34673	NA	NA	-2.04165	-1.57118	NA	NA	3
ABCA10	NA	2.25264	NA	1.91788	3.59939	NA	NA	NA	3
HTR2B	NA	-2.52317	NA	-2.38504	NA	NA	NA	-1.67353	3
ALOXE3	NA	1.51712	NA	2.35451	NA	NA	NA	1.17977	3
SSTR5-AS1	NA	-6.13065	-1.66835	-3.02758	NA	NA	NA	NA	3
VNN1	NA	1.84225	NA	NA	NA	NA	1.88383	1.64355	3
TMEM140	NA	1.19588	NA	NA	3.52864	3.74835	NA	NA	3
BEST1	NA	2.23322	NA	NA	NA	3.55354	NA	1.79489	3
NES	NA	-1.03978	-2.47668	NA	NA	NA	NA	1.82603	3
LINC00472	NA	-1.12136	2.34515	2.60215	NA	NA	NA	NA	3
ANO9	NA	1.51557	1.79458	1.52209	NA	NA	NA	NA	3
PPEF1	NA	1.15123	NA	NA	4.26645	3.72539	NA	NA	3
KIRREL2	NA	1.02701	NA	1.48163	NA	1.8365	NA	NA	3
FFAR4	NA	-2.05197	NA	-2.85149	-1.58449	NA	NA	NA	3
MMP9	NA	2.50119	NA	NA	NA	NA	2.28462	2.31004	3
TMEM158	NA	1.61245	NA	1.24799	NA	-1.07809	NA	NA	3
ADH1C	NA	-5.61973	-2.1846	NA	NA	-1.72877	NA	NA	3
AOC3	NA	-1.1191	2.1166	2.71851	NA	NA	NA	NA	3
CLEC2B	NA	2.62747	NA	1.91031	3.70387	NA	NA	NA	3
TRPV3	NA	1.17795	2.35537	1.1445	NA	NA	NA	NA	3
DDIT4L	NA	1.11891	NA	1.29375	NA	NA	NA	1.07978	3
STON1	NA	1.47605	NA	2.84126	NA	NA	-1.50993	NA	3
ASH1L-AS1	NA	-1.22515	2.0864	1.50066	NA	NA	NA	NA	3
CCNG2	NA	1.00696	1.11765	2.19574	NA	NA	NA	NA	3
SPON2	NA	-2.8349	2.36243	NA	NA	NA	NA	-1.25976	3
ARHGEF6	NA	1.41352	NA	2.20613	3.4733	NA	NA	NA	3
FGF19	NA	2.7934	NA	NA	3.77009	3.93221	NA	NA	3
S100A9	NA	3.05753	NA	1.23064	NA	NA	1.10699	NA	3
FGFBP1	NA	-2.36559	-2.40956	-4.3293	NA	NA	NA	NA	3
COL21A1	NA	-1.08249	NA	-2.45297	NA	NA	NA	-1.54849	3
HIST1H2AM	NA	-1.66478	2.53794	3.95842	NA	NA	NA	NA	3
TNS1	NA	1.35791	NA	2.22898	NA	1.32606	NA	NA	3
LOX	NA	3.80935	NA	2.46176	-1.4594	NA	NA	NA	3
GRIN2C	NA	-2.23635	1.50752	1.25221	NA	NA	NA	NA	3
HIST1H3H	NA	-1.19815	1.25457	1.17608	NA	NA	NA	NA	3
GJB1	NA	-4.87796	NA	NA	-1.56783	-1.77409	NA	NA	3
TCTE3	NA	-2.12399	2.80099	2.9558	NA	NA	NA	NA	3
CDH16	NA	-2.33567	-5.43781	-1.84471	NA	NA	NA	NA	3
GSTA2	NA	-4.3215	NA	-4.15247	NA	NA	NA	-1.49366	3
PDK1	NA	1.29122	NA	1.82473	-1.28741	NA	NA	NA	3
CARD9	NA	-1.26919	1.88809	1.98445	NA	NA	NA	NA	3
KLHL4	NA	-1.02703	-1.81809	-2.23479	NA	NA	NA	NA	3
MT1X	NA	1.58958	NA	1.24817	1.58705	NA	NA	NA	3
DMBT1	NA	4.04395	4.84381	4.2718	NA	NA	NA	NA	3
PDZK1	NA	-1.45146	NA	1.85423	NA	-1.13439	NA	NA	3
F3	NA	1.90723	NA	2.35419	NA	1.78896	NA	NA	3
CFP	NA	-2.42103	2.6376	3.43599	NA	NA	NA	NA	3
RORA	NA	1.22594	NA	1.66433	NA	1.48905	NA	NA	3
HIST1H2AI	NA	-1.37368	2.37389	2.65633	NA	NA	NA	NA	3
PSORS1C1	NA	1.0147	NA	NA	1.47808	1.09383	NA	NA	3
CNIH2	NA	-1.88682	3.1418	2.39725	NA	NA	NA	NA	3
COLEC11	NA	1.23211	1.7484	4.24754	NA	NA	NA	NA	3
IL33	NA	2.19279	NA	NA	3.1638	NA	NA	-1.0731	3
AGT	NA	-1.94504	1.45557	NA	-1.23339	NA	NA	NA	3
RAET1L	NA	4.00672	NA	NA	5.74865	2.66656	NA	NA	3
HIST2H2BF	NA	-1.51056	3.98503	3.72362	NA	NA	NA	NA	3
MYH16	NA	1.03465	NA	NA	NA	1.25606	NA	2.30158	3
IER5	NA	NA	2.31875	2.80214	1.3922	NA	NA	NA	3
HIST2H2BE	NA	NA	3.47222	4.09415	1.23709	NA	NA	NA	3
KDM6B	NA	NA	2.98978	3.58224	NA	1.72979	NA	NA	3
KLF10	NA	NA	2.38157	3.28283	NA	2.62732	NA	NA	3
ZBTB10	NA	NA	3.11055	3.98388	NA	2.45771	NA	NA	3
VIM	NA	NA	-1.42133	-1.0417	-1.86933	NA	NA	NA	3
NEAT1	NA	NA	1.761	2.92025	NA	2.05343	NA	NA	3
COL4A2	NA	NA	-1.7123	-1.38988	NA	1.39312	NA	NA	3
FOXN2	NA	NA	2.12735	2.33639	NA	1.65956	NA	NA	3
TET3	NA	NA	2.03934	2.76111	NA	1.17521	NA	NA	3
EPHX1	NA	NA	-1.67397	-3.21327	-1.05371	NA	NA	NA	3
ZNF654	NA	NA	2.19544	2.23449	NA	1.27477	NA	NA	3
TGM2	NA	NA	1.50451	2.16407	1.07324	NA	NA	NA	3
ZBTB6	NA	NA	2.55247	2.16747	NA	1.02219	NA	NA	3
SLC12A7	NA	NA	1.81298	2.12608	1.22931	NA	NA	NA	3
CCNT2	NA	NA	1.61553	2.15507	NA	1.0777	NA	NA	3
YOD1	NA	NA	1.54133	2.01059	NA	1.12516	NA	NA	3
MIER1	NA	NA	1.70268	2.30876	NA	1.45257	NA	NA	3
ARC	NA	NA	3.23804	2.98125	4.30553	NA	NA	NA	3
SKIL	NA	NA	2.05558	2.21576	NA	1.89554	NA	NA	3
PDE4D	NA	NA	1.28515	1.37039	NA	1.92724	NA	NA	3
TUBA1A	NA	NA	-1.37892	-1.28094	-2.5419	NA	NA	NA	3
AEN	NA	NA	1.33	2.11287	1.09429	NA	NA	NA	3
MCL1	NA	NA	1.03513	1.8265	1.19066	NA	NA	NA	3
AP2M1	NA	NA	-1.14678	-1.82832	NA	-1.04965	NA	NA	3
ECH1	NA	NA	-1.18516	-1.74174	-1.0582	NA	NA	NA	3
SNIP1	NA	NA	2.25023	3.19235	1.42661	NA	NA	NA	3
WTAP	NA	NA	1.33256	2.70594	1.13612	NA	NA	NA	3
HES1	NA	NA	2.03567	3.1147	NA	1.16622	NA	NA	3
VEZF1	NA	NA	1.21807	1.98708	NA	1.23184	NA	NA	3
SLC7A2	NA	NA	1.61706	1.42541	NA	NA	NA	2.3185	3
IGFBP6	NA	NA	-1.3569	-1.70467	NA	-1.16023	NA	NA	3
CEBPB	NA	NA	1.31859	2.41082	1.45322	NA	NA	NA	3
ZNF764	NA	NA	2.38256	2.22785	1.23502	NA	NA	NA	3
PPTC7	NA	NA	1.41578	2.46275	NA	1.06849	NA	NA	3
PLD6	NA	NA	2.06692	3.45449	NA	1.16021	NA	NA	3
KLF5	NA	NA	1.20469	1.41264	NA	1.2736	NA	NA	3
VAMP2	NA	NA	1.3137	2.7644	1.03078	NA	NA	NA	3
JMJD1C	NA	NA	1.14113	1.74449	NA	1.11697	NA	NA	3
ZNF121	NA	NA	2.43875	3.21922	NA	1.05852	NA	NA	3
COPS6	NA	NA	-1.09666	-1.43189	NA	-1.06441	NA	NA	3
RIMKLB	NA	NA	1.33066	1.53078	NA	1.57383	NA	NA	3
GPBP1	NA	NA	1.11362	2.16639	1.24243	NA	NA	NA	3
LINC00641	NA	NA	1.45591	3.35944	1.25834	NA	NA	NA	3
FLCN	NA	NA	1.1266	2.3998	1.05736	NA	NA	NA	3
MIER3	NA	NA	1.25394	1.85388	NA	1.01221	NA	NA	3
IRGQ	NA	NA	1.08492	1.423	1.22397	NA	NA	NA	3
MALAT1	NA	NA	2.14094	1.71743	NA	1.28912	NA	NA	3
RBM48	NA	NA	1.64673	2.35365	1.20023	NA	NA	NA	3
MSL2	NA	NA	1.65396	1.47692	NA	1.02296	NA	NA	3
THBS1	NA	NA	-1.11129	NA	NA	2.65724	NA	1.04297	3
SNORA48	NA	NA	3.67959	3.99485	NA	3.05199	NA	NA	3
ZNF184	NA	NA	2.83686	2.13782	NA	1.09127	NA	NA	3
ZNF317	NA	NA	1.04383	2.05653	1.28931	NA	NA	NA	3
PRX	NA	NA	1.99264	2.18684	-1.43667	NA	NA	NA	3
RASSF9	NA	NA	1.49379	1.13561	NA	1.19944	NA	NA	3
RBAK	NA	NA	1.34134	2.1204	NA	1.27505	NA	NA	3
HIST3H2A	NA	NA	2.07329	2.81477	1.92798	NA	NA	NA	3
CPA4	NA	NA	-3.4058	-2.01462	NA	NA	NA	-1.25915	3
STRN3	NA	NA	1.193	1.55311	NA	1.02047	NA	NA	3
ANKRD12	NA	NA	1.45304	2.40232	NA	1.69412	NA	NA	3
TRAFD1	NA	NA	-1.24068	NA	1.80695	1.34064	NA	NA	3
TAGLN	NA	NA	-2.04178	NA	NA	1.48674	NA	1.04552	3
HIF1A-AS2	NA	NA	4.77424	4.48001	NA	5.28791	NA	NA	3
FEM1C	NA	NA	1.2455	1.87605	NA	1.07048	NA	NA	3
ZSWIM6	NA	NA	1.11097	1.4245	NA	1.00032	NA	NA	3
RSF1	NA	NA	1.01261	2.13145	NA	1.25592	NA	NA	3
FRAS1	NA	NA	-1.02987	-1.09518	-1.08838	NA	NA	NA	3
PIM1	NA	NA	1.07177	3.27191	NA	1.87259	NA	NA	3
MED26	NA	NA	1.76091	2.74677	1.31737	NA	NA	NA	3
GRHL1	NA	NA	2.68743	4.94913	NA	1.00013	NA	NA	3
DPP3	NA	NA	-1.06237	-1.54398	NA	-1.16138	NA	NA	3
BRAF	NA	NA	1.55601	1.63063	NA	1.05837	NA	NA	3
MATN2	NA	NA	-1.18347	-1.93034	-1.35225	NA	NA	NA	3
HIST3H2BB	NA	NA	6.84781	5.36383	3.36045	NA	NA	NA	3
LRIF1	NA	NA	1.07789	1.19121	NA	1.1305	NA	NA	3
CCDC71L	NA	NA	1.48027	1.36265	1.06748	NA	NA	NA	3
DARS2	NA	NA	-1.19416	-1.47336	-1.06781	NA	NA	NA	3
USP42	NA	NA	1.2404	1.97083	NA	1.05997	NA	NA	3
ZNF274	NA	NA	1.12552	NA	1.25155	1.13896	NA	NA	3
TYW5	NA	NA	1.21332	1.70933	1.02534	NA	NA	NA	3
PLXNA2	NA	NA	-1.29885	NA	1.94444	1.2318	NA	NA	3
ARHGAP30	NA	NA	2.50934	2.15502	NA	1.02054	NA	NA	3
RAB24	NA	NA	1.05768	1.74128	1.49485	NA	NA	NA	3
PAPOLG	NA	NA	1.11726	1.37177	NA	1.2895	NA	NA	3
FRMD4B	NA	NA	1.66631	1.72783	NA	1.12449	NA	NA	3
ZNF484	NA	NA	1.58848	2.28722	NA	1.36091	NA	NA	3
ZNF615	NA	NA	2.06638	1.94204	NA	1.15617	NA	NA	3
MIR3064	NA	NA	1.9894	1.70368	1.01779	NA	NA	NA	3
HSD17B7P2	NA	NA	1.65737	2.03018	2.71191	NA	NA	NA	3
OLFML2A	NA	NA	-2.74404	-2.14502	-2.07542	NA	NA	NA	3
C1orf52	NA	NA	1.02224	1.59905	1.15216	NA	NA	NA	3
MAPK8IP2	NA	NA	2.19737	NA	1.59647	NA	NA	1.31997	3
FAM84B	NA	NA	1.43204	1.30484	NA	1.01535	NA	NA	3
TLE4	NA	NA	1.10394	NA	1.55509	1.26335	NA	NA	3
ZNF430	NA	NA	1.71844	2.33144	NA	1.192	NA	NA	3
ZNF708	NA	NA	1.7341	1.11261	NA	1.42486	NA	NA	3
UPK1B	NA	NA	-1.0372	NA	-1.96636	-1.34895	NA	NA	3
ZNF296	NA	NA	1.93257	2.50196	1.92953	NA	NA	NA	3
GORAB	NA	NA	1.21049	1.27032	1.09644	NA	NA	NA	3
HSPA6	NA	NA	1.56384	1.48621	3.84424	NA	NA	NA	3
FSD1L	NA	NA	1.38793	NA	1.72088	2.52477	NA	NA	3
HES4	NA	NA	1.53356	1.40333	1.75109	NA	NA	NA	3
ZHX2	NA	NA	1.04831	1.59581	1.14467	NA	NA	NA	3
GLP2R	NA	NA	-1.28777	-1.92147	NA	2.22162	NA	NA	3
RASA2	NA	NA	1.12864	1.68766	NA	1.17344	NA	NA	3
EDN2	NA	NA	-1.89785	NA	NA	3.50048	NA	-1.3187	3
LCORL	NA	NA	1.81856	1.59586	1.02126	NA	NA	NA	3
LIN37	NA	NA	1.0329	1.60407	1.01653	NA	NA	NA	3
HIST1H1E	NA	NA	2.95375	3.20663	NA	2.24413	NA	NA	3
RGS16	NA	NA	2.09725	1.67992	2.37937	NA	NA	NA	3
ARID3B	NA	NA	1.33297	2.87935	1.17752	NA	NA	NA	3
CCDC144A	NA	NA	1.73528	1.59813	NA	1.4809	NA	NA	3
ID4	NA	NA	2.61677	1.13202	4.12699	NA	NA	NA	3
AREG	NA	NA	1.35497	1.51455	1.4082	NA	NA	NA	3
SLC38A4	NA	NA	5.1331	5.97134	NA	-2.62901	NA	NA	3
HIST1H1D	NA	NA	3.37266	2.3175	NA	3.12614	NA	NA	3
ZNF460	NA	NA	1.42991	1.76268	NA	1.70873	NA	NA	3
VTCN1	NA	NA	-3.94899	NA	-2.75178	NA	-1.07548	NA	3
ZNF675	NA	NA	1.29374	1.08901	NA	1.19898	NA	NA	3
CFLAR-AS1	NA	NA	2.44525	2.36769	NA	1.87474	NA	NA	3
KLHL11	NA	NA	1.18395	1.38003	NA	1.04663	NA	NA	3
ZNF546	NA	NA	1.03197	1.0012	NA	1.16162	NA	NA	3
PINLYP	NA	NA	3.67246	3.76714	3.79558	NA	NA	NA	3
IRX3	NA	NA	1.58636	1.89119	1.12432	NA	NA	NA	3
ADRA1B	NA	NA	-1.24566	-1.51407	NA	NA	NA	1.84049	3
LHPP	NA	NA	-1.09576	-1.76033	-1.39621	NA	NA	NA	3
ANXA10	NA	NA	1.8072	NA	NA	-2.26875	NA	-1.76101	3
ZNF264	NA	NA	1.03957	1.10764	NA	1.03558	NA	NA	3
MIR210HG	NA	NA	-1.42319	NA	-2.00223	-1.15516	NA	NA	3
SAP30	NA	NA	1.05976	1.20946	NA	-1.23161	NA	NA	3
ZNF333	NA	NA	1.91982	1.62394	NA	1.42906	NA	NA	3
TIAM2	NA	NA	1.79723	1.57999	NA	1.62307	NA	NA	3
HIST1H2BE	NA	NA	3.3858	4.3162	2.28206	NA	NA	NA	3
GCH1	NA	NA	1.05185	1.44132	1.66698	NA	NA	NA	3
CHCHD6	NA	NA	-1.13349	-1.46838	NA	-1.03204	NA	NA	3
SUMO4	NA	NA	1.8859	5.05676	3.21319	NA	NA	NA	3
ATF4	NA	NA	NA	2.06781	1.13695	1.08781	NA	NA	3
STAT2	NA	NA	NA	3.34168	2.62832	2.33861	NA	NA	3
PNPT1	NA	NA	NA	2.28467	2.05874	2.41278	NA	NA	3
TRANK1	NA	NA	NA	3.16343	4.0743	3.31872	NA	NA	3
ZNFX1	NA	NA	NA	2.1931	3.03388	2.72005	NA	NA	3
KLF4	NA	NA	NA	2.49598	5.53996	2.70524	NA	NA	3
PARP14	NA	NA	NA	2.47366	2.88114	2.97792	NA	NA	3
DUSP16	NA	NA	NA	1.64752	1.35005	1.38345	NA	NA	3
SP100	NA	NA	NA	2.06812	1.70865	2.42942	NA	NA	3
NAV2	NA	NA	NA	2.93133	2.72982	2.37135	NA	NA	3
PARP12	NA	NA	NA	2.86385	2.42368	2.29877	NA	NA	3
NLRC5	NA	NA	NA	3.29513	4.90267	3.94995	NA	NA	3
RICTOR	NA	NA	NA	1.91484	1.40095	1.90642	NA	NA	3
NEDD9	NA	NA	NA	1.87249	1.44789	1.87797	NA	NA	3
PER2	NA	NA	NA	2.69216	1.21761	1.56981	NA	NA	3
DCP1A	NA	NA	NA	2.26187	1.41727	1.59102	NA	NA	3
TRIM25	NA	NA	NA	1.67602	1.03969	1.51379	NA	NA	3
IFIT5	NA	NA	NA	2.1253	3.42552	2.8628	NA	NA	3
SCD	NA	NA	NA	-1.42454	-1.60379	-1.08517	NA	NA	3
FOSL2	NA	NA	NA	1.4781	1.05771	1.75633	NA	NA	3
ANKRD33B	NA	NA	NA	1.88718	2.48215	2.52589	NA	NA	3
TDRD7	NA	NA	NA	1.98592	2.07288	2.13027	NA	NA	3
NUAK2	NA	NA	NA	1.85731	3.05048	4.3589	NA	NA	3
XRN1	NA	NA	NA	2.23438	2.21901	2.1165	NA	NA	3
RNF19B	NA	NA	NA	1.98165	1.95598	1.88499	NA	NA	3
NR3C1	NA	NA	NA	1.3943	1.32215	1.18124	NA	NA	3
SMURF1	NA	NA	NA	1.538	1.14903	1.11478	NA	NA	3
TRIM38	NA	NA	NA	2.2973	1.89389	1.57228	NA	NA	3
CCDC174	NA	NA	NA	2.09023	1.07576	1.22658	NA	NA	3
TRIB1	NA	NA	NA	1.53827	1.0953	1.25105	NA	NA	3
C19orf66	NA	NA	NA	2.44289	2.32986	1.13414	NA	NA	3
BAZ1A	NA	NA	NA	1.3943	1.14516	1.06292	NA	NA	3
TRIM21	NA	NA	NA	2.11806	2.35282	2.22268	NA	NA	3
TAP1	NA	NA	NA	1.89372	3.58613	2.70849	NA	NA	3
MLEC	NA	NA	NA	-1.31429	-1.20763	-1.11188	NA	NA	3
DUSP10	NA	NA	NA	2.44846	2.01804	1.41999	NA	NA	3
MYD88	NA	NA	NA	1.84913	1.88377	1.50794	NA	NA	3
TBC1D22B	NA	NA	NA	2.20607	1.20593	1.41058	NA	NA	3
LAP3	NA	NA	NA	2.10626	2.33613	1.61036	NA	NA	3
PIP5K1A	NA	NA	NA	1.29091	1.03469	1.00157	NA	NA	3
MB21D2	NA	NA	NA	2.72132	2.72957	2.99933	NA	NA	3
RIPK2	NA	NA	NA	1.35544	1.66272	1.64615	NA	NA	3
FBN2	NA	NA	NA	-1.55784	2.35462	1.6032	NA	NA	3
SLC25A28	NA	NA	NA	2.17081	2.0845	1.49012	NA	NA	3
OGFR	NA	NA	NA	1.60358	1.94716	1.01918	NA	NA	3
CAT	NA	NA	NA	-1.955	-1.36066	-1.24322	NA	NA	3
NAMPT	NA	NA	NA	1.11734	1.19297	1.54628	NA	NA	3
PML	NA	NA	NA	1.88913	2.43346	2.20953	NA	NA	3
PDGFD	NA	NA	NA	-2.53673	-2.02698	-1.98406	NA	NA	3
SAMHD1	NA	NA	NA	2.46413	2.79086	2.30574	NA	NA	3
SLC25A25	NA	NA	NA	1.7812	1.22876	1.00311	NA	NA	3
GTPBP1	NA	NA	NA	1.64498	1.41454	1.13745	NA	NA	3
TRIM5	NA	NA	NA	1.43878	2.54612	2.17364	NA	NA	3
CRYZ	NA	NA	NA	-1.43944	-1.19029	-1.01099	NA	NA	3
TAP2	NA	NA	NA	1.71481	2.335	1.00264	NA	NA	3
ZNF462	NA	NA	NA	1.68513	1.57912	1.50743	NA	NA	3
UBE2L6	NA	NA	NA	1.65408	3.09504	2.51944	NA	NA	3
PRKD2	NA	NA	NA	1.39033	1.97579	1.16008	NA	NA	3
IRF2	NA	NA	NA	1.72067	1.38121	1.15319	NA	NA	3
ZCCHC2	NA	NA	NA	1.7585	1.39814	1.37669	NA	NA	3
CDK17	NA	NA	NA	1.35653	1.42536	1.48533	NA	NA	3
PLEKHA4	NA	NA	NA	5.51442	2.85441	1.4371	NA	NA	3
OTUD1	NA	NA	NA	2.10119	4.71395	2.87224	NA	NA	3
ZC3HAV1	NA	NA	NA	1.12439	4.06168	2.42852	NA	NA	3
HDX	NA	NA	NA	2.1903	1.93075	2.52222	NA	NA	3
APOL2	NA	NA	NA	1.16221	1.9544	1.07981	NA	NA	3
CRIP2	NA	NA	NA	-1.80098	-1.48944	-1.46649	NA	NA	3
RAB30	NA	NA	NA	2.05058	1.55312	2.02509	NA	NA	3
PCGF5	NA	NA	NA	1.31961	1.74585	1.14179	NA	NA	3
ZNF107	NA	NA	NA	1.82138	1.15058	1.59872	NA	NA	3
ADM	NA	NA	NA	2.5266	1.85673	1.81017	NA	NA	3
OTUD4	NA	NA	NA	1.23921	1.08502	1.19752	NA	NA	3
FA2H	NA	NA	NA	1.39883	1.30807	1.02868	NA	NA	3
TNFSF10	NA	NA	NA	5.23293	3.28536	3.01562	NA	NA	3
PLK3	NA	NA	NA	1.54138	1.42179	1.08829	NA	NA	3
SOCS2	NA	NA	NA	1.697	2.01222	1.44882	NA	NA	3
TRIM22	NA	NA	NA	3.14546	5.82015	5.65101	NA	NA	3
APOBEC3F	NA	NA	NA	2.16937	1.52679	1.94459	NA	NA	3
SPRY2	NA	NA	NA	1.70979	2.34909	2.25118	NA	NA	3
HAS2	NA	NA	NA	1.98081	2.77924	1.1579	NA	NA	3
MYLK	NA	NA	NA	-1.23563	-1.63577	NA	-1.43246	NA	3
KPNA5	NA	NA	NA	2.22708	1.1394	1.109	NA	NA	3
GTPBP2	NA	NA	NA	1.16143	1.01571	1.26382	NA	NA	3
IRS2	NA	NA	NA	1.01583	1.35506	2.25487	NA	NA	3
TOP2A	NA	NA	NA	-1.12292	-1.15568	-1.22816	NA	NA	3
EHD4	NA	NA	NA	1.02928	1.29654	1.21015	NA	NA	3
PSMB8	NA	NA	NA	1.13764	2.07178	1.14551	NA	NA	3
C5orf56	NA	NA	NA	3.03355	2.70697	2.70742	NA	NA	3
UBA7	NA	NA	NA	5.82098	3.24054	1.81341	NA	NA	3
IFNB1	NA	NA	NA	8.41304	13.9651	10.0018	NA	NA	3
BTN3A1	NA	NA	NA	1.5693	2.0807	1.12241	NA	NA	3
NMI	NA	NA	NA	1.04511	2.45833	1.98391	NA	NA	3
TMX4	NA	NA	NA	-1.49493	-1.04532	-1.00346	NA	NA	3
UBN2	NA	NA	NA	1.15472	1.81866	1.00907	NA	NA	3
STX1B	NA	NA	NA	1.74489	2.35836	1.58879	NA	NA	3
HIST1H3E	NA	NA	NA	2.77413	1.90719	1.46159	NA	NA	3
UBASH3A	NA	NA	NA	4.75448	7.07757	5.84603	NA	NA	3
SP140L	NA	NA	NA	1.60346	1.62094	1.91515	NA	NA	3
IFNL2	NA	NA	NA	8.8827	14.8857	11.3738	NA	NA	3
DANCR	NA	NA	NA	1.09628	-1.13121	-1.42921	NA	NA	3
MEG9	NA	NA	NA	2.07547	4.60856	4.11636	NA	NA	3
GAMT	NA	NA	NA	-1.66613	-1.00014	-1.53545	NA	NA	3
IFNL3	NA	NA	NA	8.73142	14.767	9.8385	NA	NA	3
MOB3C	NA	NA	NA	1.82803	1.57057	1.38795	NA	NA	3
IFNL1	NA	NA	NA	8.9971	12.0305	8.18003	NA	NA	3
ZEB1	NA	NA	NA	1.05663	1.4868	1.88642	NA	NA	3
IL22RA1	NA	NA	NA	2.25047	3.52374	1.46748	NA	NA	3
PIEZO2	NA	NA	NA	-1.11698	6.67066	1.34044	NA	NA	3
DOCK11	NA	NA	NA	-1.21826	2.24801	1.31579	NA	NA	3
DPYSL3	NA	NA	NA	-1.05695	-1.21443	-1.00137	NA	NA	3
DHX58	NA	NA	NA	3.51019	4.95436	2.87858	NA	NA	3
MMAB	NA	NA	NA	-1.27296	-1.22176	-1.62197	NA	NA	3
ZNF300P1	NA	NA	NA	3.91033	8.59407	2.41077	NA	NA	3
TLR3	NA	NA	NA	1.66147	2.84041	2.50944	NA	NA	3
IKZF3	NA	NA	NA	4.31403	2.68898	3.16477	NA	NA	3
NOD2	NA	NA	NA	3.0437	4.23331	2.98239	NA	NA	3
GMPR	NA	NA	NA	5.53737	4.57943	1.63796	NA	NA	3
DNAJC22	NA	NA	NA	-1.16734	-1.72114	NA	NA	-1.41516	3
DAB2IP	NA	NA	NA	1.02624	1.19336	1.64463	NA	NA	3
SH2B3	NA	NA	NA	1.12823	1.03198	1.30173	NA	NA	3
SIDT1	NA	NA	NA	1.66177	5.5774	2.64319	NA	NA	3
MEIS1	NA	NA	NA	2.25486	1.23623	1.24758	NA	NA	3
IMPA2	NA	NA	NA	-1.04334	-1.03496	-1.22137	NA	NA	3
TNFSF13B	NA	NA	NA	2.55462	4.95373	3.04279	NA	NA	3
PIK3AP1	NA	NA	NA	1.65324	1.24014	1.08576	NA	NA	3
PDZD2	NA	NA	NA	3.65183	3.97234	4.1837	NA	NA	3
ETV7	NA	NA	NA	3.48901	6.12665	4.68938	NA	NA	3
HCG27	NA	NA	NA	2.65038	3.07068	1.89755	NA	NA	3
RASGEF1B	NA	NA	NA	5.36932	1.43219	2.11413	NA	NA	3
ZNF441	NA	NA	NA	3.59299	1.57829	1.75326	NA	NA	3
ZNF44	NA	NA	NA	2.60828	1.34816	1.30817	NA	NA	3
APOL3	NA	NA	NA	3.15068	5.27519	2.91962	NA	NA	3
IFITM10	NA	NA	NA	-1.1546	-1.31294	NA	-1.5715	NA	3
HIST1H2BG	NA	NA	NA	5.56879	3.43315	1.50712	NA	NA	3
HLA-L	NA	NA	NA	1.78132	1.84724	1.00475	NA	NA	3
TMEM106A	NA	NA	NA	1.47333	NA	2.48738	NA	1.15481	3
SECTM1	NA	NA	NA	2.28006	4.62135	1.56018	NA	NA	3
REEP6	NA	NA	NA	-2.30973	-1.33576	-1.03714	NA	NA	3
BTN2A3P	NA	NA	NA	1.69203	1.54703	1.05834	NA	NA	3
NKD2	NA	NA	NA	1.36695	3.96632	1.93136	NA	NA	3
ADRB2	NA	NA	NA	2.13549	1.96175	2.47213	NA	NA	3
ASPHD2	NA	NA	NA	1.40036	2.08759	1.63644	NA	NA	3
ANAPC15	NA	NA	NA	-1.78085	-1.13792	-1.09499	NA	NA	3
DMBX1	NA	NA	NA	2.1897	-3.15166	-1.3807	NA	NA	3
GIMAP2	NA	NA	NA	3.19445	3.22574	2.54354	NA	NA	3
CYP2J2	NA	NA	NA	2.90882	1.99559	1.10369	NA	NA	3
CPEB3	NA	NA	NA	1.42597	3.33291	1.89889	NA	NA	3
TEX15	NA	NA	NA	-2.27198	-1.3566	-2.64647	NA	NA	3
IL7	NA	NA	NA	2.41678	2.34213	NA	NA	1.28123	3
PIGZ	NA	NA	NA	-2.33533	-1.19063	-1.10718	NA	NA	3
ACTN2	NA	NA	NA	3.63133	10.6819	3.95788	NA	NA	3
GYG2	NA	NA	NA	-1.05765	-1.01072	-1.11235	NA	NA	3
RTP4	NA	NA	NA	4.97568	4.42704	3.4585	NA	NA	3
ARAP2	NA	NA	NA	1.26787	1.47461	1.13573	NA	NA	3
IL12A	NA	NA	NA	1.64663	4.13685	3.85338	NA	NA	3
LEKR1	NA	NA	NA	2.00168	1.22924	1.03444	NA	NA	3
HAND1	NA	NA	NA	3.73284	7.18808	4.96791	NA	NA	3
BEST3	NA	NA	NA	2.48785	1.65846	2.07085	NA	NA	3
SERPINA5	NA	NA	NA	3.73073	-1.02821	NA	NA	3.02443	3
HRASLS2	NA	NA	NA	2.40939	3.28146	2.48015	NA	NA	3
IL10RA	NA	NA	NA	2.03864	7.29405	3.17297	NA	NA	3
TRIM69	NA	NA	NA	3.70782	2.47774	3.52062	NA	NA	3
RUFY4	NA	NA	NA	3.59094	5.35196	4.13544	NA	NA	3
PTGS1	NA	NA	NA	1.49465	1.56254	NA	NA	-1.08833	3
HEPHL1	NA	NA	NA	2.0653	NA	NA	1.30766	2.09657	3
CACNA1I	NA	NA	NA	2.25769	6.39297	2.17408	NA	NA	3
FBXO6	NA	NA	NA	1.16475	2.80429	1.89373	NA	NA	3
MPV17L	NA	NA	NA	-2.48459	NA	-2.16273	NA	1.15796	3
CASP1	NA	NA	NA	1.74903	3.82505	2.49559	NA	NA	3
CTH	NA	NA	NA	-1.7107	2.00265	2.48942	NA	NA	3
NUDT8	NA	NA	NA	-1.19975	-1.38412	-1.63266	NA	NA	3
CENPI	NA	NA	NA	-1.30914	-1.07125	-1.37892	NA	NA	3
DAPP1	NA	NA	NA	2.2721	1.75546	2.45742	NA	NA	3
GBP7	NA	NA	NA	1.72586	4.98227	4.17862	NA	NA	3
MRGPRX3	NA	NA	NA	2.59622	NA	NA	1.95589	2.33457	3
KRT6B	NA	NA	NA	NA	2.30063	2.05004	1.54791	NA	3
SPRR2A	NA	NA	NA	NA	NA	2.0878	1.68731	2.43357	3
PLAT	NA	NA	NA	NA	1.2869	2.44884	1.3948	NA	3
EDN1	NA	NA	NA	NA	NA	1.98525	1.05997	1.31126	3
VNN3	NA	NA	NA	NA	NA	2.12229	2.74052	1.30599	3
UBD	NA	NA	NA	NA	1.82697	1.9059	NA	1.91155	3
EPHA4	NA	NA	NA	NA	3.44412	1.09726	NA	-1.07222	3
SYNPO2	NA	NA	NA	NA	5.18196	3.60392	NA	-1.6427	3
SNPH	NA	NA	NA	NA	4.13659	1.3626	NA	1.01058	3
EGFL6	NA	NA	NA	NA	2.80716	3.03583	NA	-1.03261	3
WFDC5	NA	NA	NA	NA	10.084	5.16958	NA	1.4234	3
CACNA1D	NA	NA	NA	NA	-1.63204	-1.20721	NA	-1.74971	3
ADAMTS6	NA	NA	NA	NA	2.24846	2.60384	NA	1.9183	3
SOSTDC1	NA	NA	NA	NA	-3.49622	-2.29976	NA	-1.43492	3
MBNL3	NA	NA	NA	NA	-1.0677	-1.07806	NA	-1.04327	3
KRTAP2-3	NA	NA	NA	NA	2.41264	2.72294	NA	1.39625	3
FAP	NA	NA	NA	NA	8.09935	3.23515	NA	1.16259	3
CXCL9	NA	NA	NA	NA	7.44594	4.10117	NA	2.00623	3
HSD17B14	NA	NA	NA	NA	4.74994	2.53084	NA	1.17092	3
CD69	NA	NA	NA	NA	3.72244	3.11327	NA	2.41326	3
IL2RG	NA	NA	NA	NA	2.89846	1.20128	NA	1.15632	3
CPXM1	NA	NA	NA	NA	7.43924	2.12901	NA	2.8396	3
SAA4	NA	NA	NA	NA	3.74613	2.56442	NA	1.84972	3
FGG	1.01412	NA	2.21906	NA	NA	NA	NA	NA	2
SNORD26	2.13747	NA	NA	1.54042	NA	NA	NA	NA	2
GPX2	NA	-2.7811	NA	-2.44982	NA	NA	NA	NA	2
GREM1	NA	3.17639	NA	NA	4.00658	NA	NA	NA	2
FGFR4	NA	-2.65857	NA	-1.12091	NA	NA	NA	NA	2
INSL4	NA	-3.22234	NA	-2.58137	NA	NA	NA	NA	2
PODXL	NA	1.96778	NA	NA	1.62013	NA	NA	NA	2
GAS5	NA	2.6898	NA	1.03266	NA	NA	NA	NA	2
H2AFX	NA	-2.48902	NA	NA	NA	-2.1326	NA	NA	2
FAM129A	NA	3.61904	NA	NA	2.4039	NA	NA	NA	2
CCND3	NA	-2.11201	NA	-1.5118	NA	NA	NA	NA	2
TONSL	NA	-2.22764	NA	NA	NA	-1.4184	NA	NA	2
SPAG5	NA	-1.6498	NA	NA	NA	-1.48014	NA	NA	2
POLD1	NA	-1.74928	NA	NA	NA	-1.90796	NA	NA	2
ULBP1	NA	3.3191	NA	NA	NA	3.13964	NA	NA	2
ITGA2	NA	2.41969	NA	NA	NA	1.11657	NA	NA	2
RBM14	NA	-1.9846	NA	-1.4265	NA	NA	NA	NA	2
LMNB2	NA	-1.60034	NA	NA	NA	-1.17622	NA	NA	2
HSPA1A	NA	-2.10808	NA	NA	NA	-1.24606	NA	NA	2
CEBPG	NA	1.62883	NA	NA	NA	1.00143	NA	NA	2
CBS	NA	2.47198	NA	NA	NA	NA	NA	1.11682	2
TRIB3	NA	1.7317	NA	NA	NA	NA	NA	1.36633	2
RSL24D1	NA	1.59754	NA	NA	NA	1.33752	NA	NA	2
RAI14	NA	1.52127	NA	1.10021	NA	NA	NA	NA	2
LIG1	NA	-1.51528	NA	NA	NA	-1.19082	NA	NA	2
FAM111B	NA	-2.53251	NA	NA	NA	-1.062	NA	NA	2
POLR2E	NA	-1.47603	NA	-1.47112	NA	NA	NA	NA	2
AXL	NA	1.66184	-1.34874	NA	NA	NA	NA	NA	2
CDC6	NA	-1.81246	NA	-1.03435	NA	NA	NA	NA	2
NTN4	NA	1.60095	NA	-1.14479	NA	NA	NA	NA	2
FGF2	NA	1.66761	NA	NA	NA	1.21422	NA	NA	2
MCM7	NA	-1.52727	NA	NA	NA	-1.05791	NA	NA	2
KPNA2	NA	-1.28176	NA	NA	NA	-1.48345	NA	NA	2
KIF22	NA	-1.44931	NA	NA	NA	-1.01077	NA	NA	2
KIFC1	NA	-1.60011	NA	NA	NA	-1.22198	NA	NA	2
SAMD11	NA	-1.60825	1.26106	NA	NA	NA	NA	NA	2
MCM10	NA	-2.15457	NA	NA	NA	NA	NA	-1.44892	2
MYBL2	NA	-1.50193	NA	-1.33404	NA	NA	NA	NA	2
LRP3	NA	-1.4823	NA	NA	NA	-1.45176	NA	NA	2
CCNB1IP1	NA	1.68738	NA	1.14546	NA	NA	NA	NA	2
C1QTNF6	NA	-1.71747	NA	-1.32707	NA	NA	NA	NA	2
ALYREF	NA	-1.70679	NA	NA	NA	-1.02853	NA	NA	2
PCDH1	NA	3.2401	NA	1.25104	NA	NA	NA	NA	2
ASS1	NA	1.77821	2.06444	NA	NA	NA	NA	NA	2
MCM2	NA	-1.75199	NA	-1.08489	NA	NA	NA	NA	2
PHLDB2	NA	1.37804	NA	NA	NA	2.31641	NA	NA	2
GPS1	NA	-1.46733	NA	-1.5559	NA	NA	NA	NA	2
BAAT	NA	-2.34224	NA	-1.29531	NA	NA	NA	NA	2
GTSE1	NA	-1.66572	NA	NA	NA	-1.20997	NA	NA	2
PCK2	NA	1.92946	NA	NA	NA	2.22773	NA	NA	2
POR	NA	-1.26873	NA	-1.17331	NA	NA	NA	NA	2
KRT18	NA	-1.37125	NA	-1.46076	NA	NA	NA	NA	2
LLGL2	NA	-1.49193	NA	-1.30424	NA	NA	NA	NA	2
HMGA2	NA	1.94702	NA	NA	NA	NA	NA	1.06372	2
SLC12A2	NA	-1.57258	NA	-1.93228	NA	NA	NA	NA	2
ORC1	NA	-1.68896	NA	NA	NA	-1.05626	NA	NA	2
THOP1	NA	-1.47799	NA	NA	NA	-1.78026	NA	NA	2
DTL	NA	-1.48657	NA	NA	NA	NA	NA	-1.06617	2
SFRP4	NA	-2.12633	NA	-2.10075	NA	NA	NA	NA	2
DRAM1	NA	1.42223	NA	NA	NA	1.06369	NA	NA	2
MRPS12	NA	-1.38994	NA	-1.29777	NA	NA	NA	NA	2
NCLN	NA	-1.54361	NA	NA	NA	-1.33184	NA	NA	2
ALDH4A1	NA	-1.84735	NA	-1.9306	NA	NA	NA	NA	2
GALK1	NA	-1.64919	NA	-1.23765	NA	NA	NA	NA	2
FAM83D	NA	-1.52482	NA	NA	NA	-1.45372	NA	NA	2
IFNGR1	NA	1.2646	NA	NA	NA	1.03002	NA	NA	2
CTSS	NA	1.48857	NA	NA	1.99757	NA	NA	NA	2
MKI67	NA	-1.26303	NA	NA	NA	-1.14729	NA	NA	2
SNRNP70	NA	-1.4821	NA	NA	NA	-1.01906	NA	NA	2
GPAA1	NA	-1.22025	NA	-1.59953	NA	NA	NA	NA	2
CPLX2	NA	-1.64334	NA	-2.80962	NA	NA	NA	NA	2
SLC7A11	NA	1.39256	NA	-1.92952	NA	NA	NA	NA	2
TUBA4A	NA	-1.22014	-1.34457	NA	NA	NA	NA	NA	2
CPS1	NA	-1.3701	NA	-1.65928	NA	NA	NA	NA	2
MAP1B	NA	1.25213	NA	NA	NA	1.72389	NA	NA	2
ANK2	NA	2.36267	NA	NA	NA	1.40813	NA	NA	2
TUBG1	NA	-1.28718	NA	-1.00178	NA	NA	NA	NA	2
EXOSC4	NA	-1.66291	NA	-1.14651	NA	NA	NA	NA	2
RAP1GAP	NA	-1.38176	NA	-1.78477	NA	NA	NA	NA	2
SCARA5	NA	-3.08459	NA	-3.13859	NA	NA	NA	NA	2
SMURF2	NA	1.2726	NA	1.28325	NA	NA	NA	NA	2
CYB5B	NA	-1.08003	NA	-1.68081	NA	NA	NA	NA	2
CALR	NA	-1.11376	NA	-1.82868	NA	NA	NA	NA	2
NCAPH	NA	-1.26436	NA	NA	NA	-1.00972	NA	NA	2
LTBP2	NA	1.13217	NA	1.17378	NA	NA	NA	NA	2
NTRK3	NA	-1.09534	NA	-1.32003	NA	NA	NA	NA	2
MBD3	NA	-1.2983	NA	NA	NA	-1.09667	NA	NA	2
ITGA5	NA	1.32053	NA	NA	NA	NA	NA	1.1823	2
PHGDH	NA	1.57903	NA	-1.79272	NA	NA	NA	NA	2
MMP10	NA	3.74694	NA	1.84487	NA	NA	NA	NA	2
MVK	NA	-1.81184	NA	NA	NA	-1.60207	NA	NA	2
HJURP	NA	-1.03675	NA	NA	NA	-1.08141	NA	NA	2
TIMELESS	NA	-1.18523	NA	-1.00937	NA	NA	NA	NA	2
TST	NA	-1.71278	NA	-1.40458	NA	NA	NA	NA	2
WDR90	NA	-1.80373	NA	NA	NA	-1.67315	NA	NA	2
ERAP1	NA	1.23007	NA	NA	1.46678	NA	NA	NA	2
AURKA	NA	-1.12235	NA	NA	NA	-1.12039	NA	NA	2
KLF7	NA	1.37079	NA	2.19496	NA	NA	NA	NA	2
PIGQ	NA	-1.34707	NA	-1.54878	NA	NA	NA	NA	2
IMP3	NA	-1.37833	NA	NA	NA	-1.36184	NA	NA	2
TROAP	NA	-1.32121	NA	NA	NA	-1.13305	NA	NA	2
CCNB1	NA	-1.09421	NA	NA	NA	-1.58111	NA	NA	2
TELO2	NA	-1.46576	NA	NA	NA	-1.09449	NA	NA	2
CXXC5	NA	-1.79453	NA	-1.31618	NA	NA	NA	NA	2
SCG5	NA	2.9964	NA	NA	NA	NA	NA	1.23151	2
MYO18A	NA	-1.16894	NA	-1.02716	NA	NA	NA	NA	2
DIO2	NA	-3.13132	NA	NA	NA	NA	NA	-5.41428	2
CENPO	NA	-1.12071	NA	NA	NA	-1.33127	NA	NA	2
RHPN1	NA	-1.38078	NA	NA	NA	-1.09617	NA	NA	2
EMC10	NA	-1.06439	NA	-1.66798	NA	NA	NA	NA	2
GMPPB	NA	-1.64413	NA	NA	NA	-1.14793	NA	NA	2
ERCC6L	NA	-1.42689	NA	NA	NA	-1.11982	NA	NA	2
CCNF	NA	-1.32769	NA	NA	NA	-1.48335	NA	NA	2
KLHDC7A	NA	-2.36327	NA	-1.822	NA	NA	NA	NA	2
HEG1	NA	1.45234	NA	NA	NA	1.44951	NA	NA	2
IFRD1	NA	1.27011	NA	1.82316	NA	NA	NA	NA	2
PASK	NA	-1.37176	NA	NA	NA	-1.06328	NA	NA	2
PHLDA1	NA	1.03043	NA	1.92111	NA	NA	NA	NA	2
CLIC4	NA	1.28735	NA	NA	NA	1.20573	NA	NA	2
BRAT1	NA	-1.21936	NA	-1.09153	NA	NA	NA	NA	2
CNN3	NA	-1.15059	NA	-1.12551	NA	NA	NA	NA	2
ZDHHC12	NA	-1.31615	NA	-1.15097	NA	NA	NA	NA	2
KANK2	NA	-1.11564	NA	-1.45242	NA	NA	NA	NA	2
LY6E	NA	-1.0325	NA	NA	1.66748	NA	NA	NA	2
GARS	NA	1.30914	NA	NA	NA	1.24671	NA	NA	2
C21orf58	NA	-2.03997	NA	NA	NA	-1.75815	NA	NA	2
TBX3	NA	-1.53446	NA	1.185	NA	NA	NA	NA	2
SYNM	NA	-1.1984	NA	-1.12774	NA	NA	NA	NA	2
RNASEH2C	NA	-1.51903	NA	NA	NA	-1.44932	NA	NA	2
PLD1	NA	1.28737	NA	NA	NA	1.05395	NA	NA	2
CCPG1	NA	1.56104	NA	-1.02475	NA	NA	NA	NA	2
UNC93B1	NA	-1.07675	NA	NA	1.35775	NA	NA	NA	2
PLEK2	NA	1.3237	-1.32302	NA	NA	NA	NA	NA	2
CAPRIN2	NA	1.13738	NA	1.23638	NA	NA	NA	NA	2
KIAA1549L	NA	1.50118	NA	1.46909	NA	NA	NA	NA	2
SNHG8	NA	1.45574	NA	1.02528	NA	NA	NA	NA	2
PPP1R16A	NA	-1.22225	NA	NA	NA	-1.27146	NA	NA	2
MIF	NA	-1.12279	NA	NA	NA	-1.42105	NA	NA	2
RFC5	NA	-1.13522	NA	-1.31197	NA	NA	NA	NA	2
MFSD3	NA	-1.40153	NA	NA	NA	-1.41706	NA	NA	2
FDXR	NA	-1.3307	NA	NA	NA	-1.37918	NA	NA	2
CD47	NA	1.23027	NA	NA	1.39727	NA	NA	NA	2
TICRR	NA	-1.24455	NA	NA	NA	-1.05724	NA	NA	2
ATP6V0D1	NA	-1.18149	NA	NA	NA	-1.25632	NA	NA	2
NOC2L	NA	-1.10661	NA	-1.24542	NA	NA	NA	NA	2
MXI1	NA	1.71722	NA	1.43272	NA	NA	NA	NA	2
NR2F6	NA	-1.07722	NA	-1.12897	NA	NA	NA	NA	2
MAP1LC3B	NA	1.04181	NA	1.90791	NA	NA	NA	NA	2
TMEM160	NA	-1.7204	NA	NA	NA	-2.03699	NA	NA	2
CDH4	NA	1.18351	-1.39391	NA	NA	NA	NA	NA	2
PTMS	NA	-1.3161	NA	-1.33071	NA	NA	NA	NA	2
TNFRSF10B	NA	1.07035	NA	NA	1.19942	NA	NA	NA	2
KDM5B	NA	1.03919	NA	1.82372	NA	NA	NA	NA	2
PITPNM1	NA	-1.00434	NA	-1.07272	NA	NA	NA	NA	2
RPUSD1	NA	-1.3604	NA	NA	NA	-1.07088	NA	NA	2
ZCCHC7	NA	1.26461	NA	1.22889	NA	NA	NA	NA	2
PCDH9	NA	-1.25046	NA	NA	1.35508	NA	NA	NA	2
ZNF558	NA	1.28349	NA	1.40643	NA	NA	NA	NA	2
WDR81	NA	-1.13708	NA	-1.09459	NA	NA	NA	NA	2
ARHGEF39	NA	-1.24574	NA	NA	NA	-1.19712	NA	NA	2
IDI1	NA	-1.07059	NA	NA	NA	-1.0223	NA	NA	2
BAG1	NA	-1.09049	NA	NA	1.03785	NA	NA	NA	2
FLNB	NA	1.01255	NA	NA	NA	1.63696	NA	NA	2
TOB1	NA	-1.10492	1.08522	NA	NA	NA	NA	NA	2
SLC39A3	NA	-1.4905	NA	NA	NA	-1.14739	NA	NA	2
CNP	NA	-1.00014	NA	NA	1.40294	NA	NA	NA	2
PRR15	NA	-2.10327	NA	NA	1.34023	NA	NA	NA	2
ARHGAP18	NA	-1.13238	NA	-1.61561	NA	NA	NA	NA	2
BEX2	NA	2.8988	NA	1.75811	NA	NA	NA	NA	2
RAD54L	NA	-1.64574	NA	NA	NA	-1.13238	NA	NA	2
ERF	NA	-1.05718	1.36295	NA	NA	NA	NA	NA	2
LRRC8C	NA	1.1471	NA	1.77058	NA	NA	NA	NA	2
TMEM104	NA	-1.31136	NA	-1.2721	NA	NA	NA	NA	2
MARCHF4	NA	1.09614	NA	NA	NA	2.98728	NA	NA	2
CDC20	NA	-1.09709	NA	NA	NA	-1.04483	NA	NA	2
SEL1L3	NA	1.10003	NA	-1.15241	NA	NA	NA	NA	2
ZNF574	NA	-1.08376	NA	1.32492	NA	NA	NA	NA	2
ISOC2	NA	-1.3358	NA	-2.00922	NA	NA	NA	NA	2
KIF21B	NA	1.33442	NA	NA	NA	2.13269	NA	NA	2
TRIM26	NA	-1.07149	NA	NA	1.61966	NA	NA	NA	2
DKK1	NA	-1.11569	NA	-1.09569	NA	NA	NA	NA	2
CKB	NA	-1.23766	NA	-1.69307	NA	NA	NA	NA	2
BCL2L12	NA	-1.20696	NA	NA	NA	-1.43191	NA	NA	2
ENO3	NA	-1.14939	NA	NA	1.66692	NA	NA	NA	2
SPC25	NA	-1.2958	NA	NA	NA	-1.36425	NA	NA	2
NCAPD3	NA	-1.10909	NA	-1.99547	NA	NA	NA	NA	2
NUDT1	NA	-1.40567	NA	-1.13239	NA	NA	NA	NA	2
SERPINA6	NA	-2.75979	NA	NA	NA	1.02615	NA	NA	2
ALG3	NA	-1.06712	NA	-1.57622	NA	NA	NA	NA	2
AGTPBP1	NA	1.0938	NA	NA	-1.03966	NA	NA	NA	2
GPRIN2	NA	-1.1189	NA	-1.13397	NA	NA	NA	NA	2
CLGN	NA	1.42421	NA	-1.34189	NA	NA	NA	NA	2
SSNA1	NA	-1.01534	NA	NA	NA	-1.11143	NA	NA	2
HS6ST1	NA	-1.15143	NA	NA	NA	-1.03514	NA	NA	2
ELOVL7	NA	1.17635	NA	1.38606	NA	NA	NA	NA	2
NCAPG	NA	-1.00886	NA	NA	NA	NA	NA	-1.02893	2
BRI3BP	NA	-1.66019	NA	NA	-1.34549	NA	NA	NA	2
TMPO-AS1	NA	-1.90264	NA	NA	NA	-1.23975	NA	NA	2
SPC24	NA	-1.95228	NA	NA	NA	-1.48133	NA	NA	2
RPS19BP1	NA	-1.2116	NA	NA	NA	-1.02405	NA	NA	2
BOP1	NA	-1.39694	NA	-1.07665	NA	NA	NA	NA	2
CARS	NA	1.11705	NA	NA	NA	1.17777	NA	NA	2
ICA1	NA	1.75058	NA	-1.3811	NA	NA	NA	NA	2
NABP1	NA	1.4418	NA	NA	NA	1.00526	NA	NA	2
GADD45GIP1	NA	-1.03418	NA	-1.20715	NA	NA	NA	NA	2
FBXL6	NA	-1.28531	NA	NA	NA	-1.0307	NA	NA	2
VTN	NA	-1.56697	NA	-1.29586	NA	NA	NA	NA	2
RRAGC	NA	1.07774	NA	1.30307	NA	NA	NA	NA	2
FNDC3B	NA	1.08641	NA	NA	NA	1.26122	NA	NA	2
HSPB1	NA	-1.00172	NA	-1.20718	NA	NA	NA	NA	2
CDCA7L	NA	-1.01755	NA	-1.13712	NA	NA	NA	NA	2
PDK2	NA	-1.10876	NA	-2.32885	NA	NA	NA	NA	2
GLA	NA	-1.1779	NA	-1.00136	NA	NA	NA	NA	2
GOLGA8B	NA	1.05948	NA	NA	NA	1.03442	NA	NA	2
EGFR	NA	1.1719	NA	NA	NA	1.49109	NA	NA	2
HOXB13	NA	-1.59207	-1.20354	NA	NA	NA	NA	NA	2
DLC1	NA	1.1633	NA	NA	NA	1.37999	NA	NA	2
IGFLR1	NA	-1.83599	NA	NA	NA	-1.38184	NA	NA	2
NALCN	NA	1.5421	-1.63586	NA	NA	NA	NA	NA	2
SLC45A4	NA	-1.20329	1.45747	NA	NA	NA	NA	NA	2
CEACAM6	NA	-1.38189	NA	-1.22395	NA	NA	NA	NA	2
MSRB1	NA	-1.01187	NA	-1.70281	NA	NA	NA	NA	2
TAF6L	NA	-1.2777	NA	NA	NA	-1.09432	NA	NA	2
YARS	NA	1.15839	NA	NA	NA	1.14502	NA	NA	2
OLFML3	NA	-2.73727	NA	-3.2516	NA	NA	NA	NA	2
PIK3R3	NA	-2.5591	NA	NA	1.85575	NA	NA	NA	2
POP5	NA	-1.13795	NA	NA	NA	-1.22014	NA	NA	2
EHF	NA	-1.43844	NA	-1.71175	NA	NA	NA	NA	2
CRELD2	NA	-1.21157	NA	-1.44489	NA	NA	NA	NA	2
BIN1	NA	-1.01747	NA	-1.01987	NA	NA	NA	NA	2
DNAJB9	NA	1.04466	NA	NA	1.1167	NA	NA	NA	2
PIP5K1C	NA	-1.05293	NA	-1.04563	NA	NA	NA	NA	2
NDUFAF3	NA	-1.00961	NA	-1.61277	NA	NA	NA	NA	2
SELENBP1	NA	-1.37037	NA	-1.2956	NA	NA	NA	NA	2
MUC5B	NA	-1.18466	NA	-1.16974	NA	NA	NA	NA	2
TUBB3	NA	-1.15067	NA	NA	NA	NA	NA	1.21099	2
VAV1	NA	1.28374	NA	NA	NA	2.11931	NA	NA	2
TUBE1	NA	1.45859	NA	NA	NA	1.39616	NA	NA	2
MDGA1	NA	-1.138	NA	NA	1.69834	NA	NA	NA	2
AKNA	NA	1.22524	NA	NA	NA	1.02383	NA	NA	2
ZC3H6	NA	1.78424	NA	NA	NA	1.45449	NA	NA	2
OLR1	NA	2.36285	NA	NA	NA	2.65456	NA	NA	2
TARBP2	NA	-1.00306	NA	-1.00038	NA	NA	NA	NA	2
ANKRD54	NA	-1.11227	NA	NA	NA	-1.15369	NA	NA	2
TMEM201	NA	-1.26143	NA	NA	NA	-1.03301	NA	NA	2
APOH	NA	-1.89529	NA	-2.17681	NA	NA	NA	NA	2
C9orf72	NA	1.17738	NA	1.38505	NA	NA	NA	NA	2
MBNL2	NA	1.06863	NA	NA	NA	1.01027	NA	NA	2
ZNF771	NA	-1.84609	NA	NA	NA	-1.56851	NA	NA	2
C1orf116	NA	-1.48021	-1.53492	NA	NA	NA	NA	NA	2
NDUFA4L2	NA	2.60105	NA	NA	NA	3.70633	NA	NA	2
ITGA11	NA	-1.14702	NA	-1.78681	NA	NA	NA	NA	2
PHLPP1	NA	-1.03628	NA	1.22699	NA	NA	NA	NA	2
FAM207A	NA	-1.15202	NA	NA	NA	-1.01089	NA	NA	2
DUS4L	NA	1.05277	NA	1.14979	NA	NA	NA	NA	2
PDF	NA	-2.46468	NA	-3.76076	NA	NA	NA	NA	2
POLI	NA	1.0828	NA	1.13603	NA	NA	NA	NA	2
COMTD1	NA	-1.12918	NA	NA	NA	-1.12421	NA	NA	2
SLC25A36	NA	1.07964	NA	1.52335	NA	NA	NA	NA	2
DAAM1	NA	1.0939	NA	1.03819	NA	NA	NA	NA	2
ASRGL1	NA	-1.1365	NA	-1.24742	NA	NA	NA	NA	2
TMEM53	NA	-1.6231	NA	-1.50802	NA	NA	NA	NA	2
ENDOG	NA	-1.41393	NA	NA	NA	-1.8085	NA	NA	2
IGFBPL1	NA	-1.64608	NA	-2.34842	NA	NA	NA	NA	2
MCAT	NA	-1.10464	NA	NA	NA	-1.05655	NA	NA	2
POLR3K	NA	-1.22352	NA	NA	NA	-1.17272	NA	NA	2
WNK2	NA	-1.37373	NA	NA	-1.15694	NA	NA	NA	2
NUDT16L1	NA	-1.22489	NA	-1.51624	NA	NA	NA	NA	2
ZMIZ1-AS1	NA	2.54611	NA	2.72623	NA	NA	NA	NA	2
VWA1	NA	-1.05391	NA	NA	NA	-1.3796	NA	NA	2
CLEC11A	NA	-1.66472	NA	NA	NA	-1.60166	NA	NA	2
UPK3B	NA	-2.65308	NA	-1.99175	NA	NA	NA	NA	2
ARRB1	NA	-1.25006	NA	NA	-1.02455	NA	NA	NA	2
FAM171A2	NA	-1.41053	NA	NA	-1.25467	NA	NA	NA	2
SEPSECS	NA	1.22576	NA	NA	NA	1.25568	NA	NA	2
AMDHD2	NA	-1.12384	NA	NA	NA	-1.24846	NA	NA	2
ZNF280C	NA	1.02961	NA	NA	NA	1.0895	NA	NA	2
PEAR1	NA	1.25784	NA	NA	NA	1.35062	NA	NA	2
STPG1	NA	1.06188	-1.29638	NA	NA	NA	NA	NA	2
RBKS	NA	1.05386	NA	-1.15158	NA	NA	NA	NA	2
EIF4E3	NA	1.04362	NA	NA	-1.44273	NA	NA	NA	2
FAM19A5	NA	-1.31135	NA	-1.18579	NA	NA	NA	NA	2
ADRA1D	NA	-1.64264	NA	-1.4673	NA	NA	NA	NA	2
FAM81A	NA	-1.09283	NA	NA	NA	-1.68993	NA	NA	2
UBXN11	NA	-1.26926	NA	NA	NA	-1.02397	NA	NA	2
KIF1A	NA	1.93015	NA	-1.77373	NA	NA	NA	NA	2
C4orf48	NA	-1.42375	NA	NA	NA	-1.42137	NA	NA	2
SALL4	NA	1.35348	NA	1.13723	NA	NA	NA	NA	2
ELMO1	NA	-1.16097	NA	-1.02996	NA	NA	NA	NA	2
FUT1	NA	4.80059	NA	NA	NA	2.76623	NA	NA	2
CHDH	NA	-1.33173	NA	NA	NA	-1.43271	NA	NA	2
NR2F1	NA	-1.36595	NA	NA	1.14776	NA	NA	NA	2
TMEM37	NA	-1.10058	NA	-1.68549	NA	NA	NA	NA	2
OIP5	NA	-1.04116	NA	NA	NA	-1.49537	NA	NA	2
METRNL	NA	1.2933	NA	NA	1.15338	NA	NA	NA	2
EEA1	NA	1.01802	NA	1.06676	NA	NA	NA	NA	2
ZMYM5	NA	1.06367	NA	1.56981	NA	NA	NA	NA	2
EFCAB13	NA	1.46124	NA	NA	NA	1.18619	NA	NA	2
PODXL2	NA	-1.15942	NA	-1.28745	NA	NA	NA	NA	2
MIR100HG	NA	1.44775	NA	NA	6.41743	NA	NA	NA	2
EPS8L3	NA	-1.88786	NA	NA	NA	NA	NA	2.41396	2
IL17RD	NA	1.16641	NA	NA	-1.46969	NA	NA	NA	2
FAT4	NA	1.72621	NA	-1.24301	NA	NA	NA	NA	2
RIBC2	NA	-2.29019	NA	NA	NA	-1.97273	NA	NA	2
ZNF576	NA	-1.01656	NA	-1.05261	NA	NA	NA	NA	2
TPGS1	NA	-1.27655	NA	NA	NA	-1.33248	NA	NA	2
TXNDC5	NA	-2.41865	NA	NA	NA	-1.94404	NA	NA	2
ABCG1	NA	1.20773	NA	NA	3.58961	NA	NA	NA	2
PTPRN2	NA	1.25185	-1.43749	NA	NA	NA	NA	NA	2
ADCK5	NA	-1.07596	NA	NA	NA	-1.2821	NA	NA	2
HPDL	NA	-2.52504	NA	NA	NA	-1.3284	NA	NA	2
HLA-DMA	NA	-1.31205	NA	-1.27355	NA	NA	NA	NA	2
HES6	NA	-1.3023	NA	NA	NA	-1.99177	NA	NA	2
ALDH3A1	NA	-1.4921	NA	-2.0877	NA	NA	NA	NA	2
RHOV	NA	-1.22534	1.42593	NA	NA	NA	NA	NA	2
RGS17	NA	1.32001	NA	1.2232	NA	NA	NA	NA	2
SYCP2L	NA	1.02483	NA	1.20864	NA	NA	NA	NA	2
TMOD2	NA	1.03243	NA	NA	NA	1.36008	NA	NA	2
HOXD10	NA	1.51922	NA	1.12099	NA	NA	NA	NA	2
SETDB2	NA	1.04748	NA	1.00719	NA	NA	NA	NA	2
ADAT3	NA	-2.39837	NA	NA	NA	-1.56413	NA	NA	2
CYB561D2	NA	-1.0574	NA	-1.27041	NA	NA	NA	NA	2
PPFIA3	NA	-1.13951	1.14825	NA	NA	NA	NA	NA	2
LOXL2	NA	1.76151	NA	NA	-1.84125	NA	NA	NA	2
SYNGR4	NA	-2.49833	NA	-3.13035	NA	NA	NA	NA	2
SLC51B	NA	-1.67216	NA	-3.00417	NA	NA	NA	NA	2
PTK6	NA	1.40475	NA	1.10619	NA	NA	NA	NA	2
RAET1E	NA	1.52805	NA	NA	NA	NA	NA	-1.02498	2
TRIQK	NA	1.05488	NA	-1.48376	NA	NA	NA	NA	2
SLC27A3	NA	-1.75621	NA	NA	NA	-1.28796	NA	NA	2
SLC43A1	NA	1.03838	NA	NA	NA	1.10432	NA	NA	2
SLC26A9	NA	-2.69915	NA	NA	NA	NA	NA	1.20299	2
SFXN2	NA	-1.36014	NA	NA	NA	-1.22435	NA	NA	2
EPHB6	NA	-1.31611	NA	NA	NA	-1.15663	NA	NA	2
IL20RB	NA	2.06818	NA	4.07425	NA	NA	NA	NA	2
HSPBAP1	NA	1.04731	NA	1.09258	NA	NA	NA	NA	2
ZNF197	NA	1.17526	NA	NA	NA	1.02921	NA	NA	2
HSD11B1	NA	2.79265	NA	NA	NA	2.34227	NA	NA	2
PCDHAC2	NA	-1.1266	-1.08148	NA	NA	NA	NA	NA	2
MMP1	NA	3.03407	NA	NA	1.62337	NA	NA	NA	2
SRSF12	NA	1.58224	NA	1.42041	NA	NA	NA	NA	2
PRKG2	NA	1.48645	NA	NA	NA	1.36472	NA	NA	2
FEZ1	NA	1.47622	NA	NA	NA	NA	NA	1.09188	2
TMEM121	NA	-1.34332	NA	NA	NA	-1.96498	NA	NA	2
ECE2	NA	-1.20886	NA	-1.51831	NA	NA	NA	NA	2
PKM	NA	-1.27642	NA	-1.15298	NA	NA	NA	NA	2
FBXW9	NA	-1.17366	NA	NA	NA	-1.56889	NA	NA	2
BEX4	NA	1.76048	NA	1.70993	NA	NA	NA	NA	2
FOXL1	NA	1.18066	NA	1.81958	NA	NA	NA	NA	2
KCNQ3	NA	2.90434	NA	NA	-1.39099	NA	NA	NA	2
DNAH5	NA	1.08619	NA	NA	-1.20152	NA	NA	NA	2
FAM131B	NA	1.57141	NA	NA	NA	NA	NA	-1.06461	2
MYPN	NA	1.74084	NA	NA	NA	1.30686	NA	NA	2
CCDC96	NA	-2.20411	NA	NA	NA	-2.03092	NA	NA	2
C9orf116	NA	-1.36254	NA	NA	NA	-2.68195	NA	NA	2
CORO2B	NA	1.07807	NA	1.64462	NA	NA	NA	NA	2
ZMAT1	NA	2.43741	NA	NA	NA	1.67443	NA	NA	2
MAP1A	NA	-1.72321	NA	-3.16794	NA	NA	NA	NA	2
BRICD5	NA	-1.29427	NA	NA	NA	-1.35769	NA	NA	2
OVCA2	NA	-1.81955	NA	NA	NA	-1.23723	NA	NA	2
TRIM2	NA	1.22401	NA	-2.3792	NA	NA	NA	NA	2
PLCXD3	NA	-1.30483	NA	-1.38854	NA	NA	NA	NA	2
RASD2	NA	1.20149	NA	NA	NA	NA	NA	1.31083	2
MOXD1	NA	1.09939	NA	-1.68257	NA	NA	NA	NA	2
GRIP2	NA	-1.36673	NA	NA	7.32699	NA	NA	NA	2
RFX3	NA	1.18664	NA	1.35167	NA	NA	NA	NA	2
ITGA4	NA	1.28932	NA	-1.20763	NA	NA	NA	NA	2
ARX	NA	-1.44215	1.57343	NA	NA	NA	NA	NA	2
EXPH5	NA	2.74671	NA	1.4993	NA	NA	NA	NA	2
CTSO	NA	1.20133	NA	NA	NA	1.15711	NA	NA	2
H19	NA	-2.7359	NA	NA	NA	NA	NA	-1.45074	2
ABCB9	NA	-1.11787	NA	-1.27706	NA	NA	NA	NA	2
PDE9A	NA	1.10388	NA	2.05808	NA	NA	NA	NA	2
ZNF674	NA	1.19413	NA	NA	NA	1.02587	NA	NA	2
SLC30A3	NA	-1.2671	NA	NA	6.09719	NA	NA	NA	2
DDIT4	NA	1.3466	NA	2.27705	NA	NA	NA	NA	2
MRAP2	NA	-1.48697	NA	NA	NA	-1.95766	NA	NA	2
RNFT2	NA	-1.24338	NA	NA	NA	-1.06028	NA	NA	2
FAM24B	NA	1.19667	NA	1.31677	NA	NA	NA	NA	2
CYP4F12	NA	-1.3968	NA	NA	NA	NA	NA	-1.07445	2
RTN4RL1	NA	-1.40156	NA	-1.66877	NA	NA	NA	NA	2
LAMA4	NA	1.98643	NA	-1.54277	NA	NA	NA	NA	2
PUS10	NA	1.11116	NA	1.68166	NA	NA	NA	NA	2
PRG4	NA	1.9674	3.70887	NA	NA	NA	NA	NA	2
IL11RA	NA	-1.1054	NA	NA	NA	-1.0089	NA	NA	2
SHC2	NA	1.36193	NA	NA	-1.01238	NA	NA	NA	2
HHIP	NA	1.09285	NA	NA	NA	NA	NA	1.55834	2
MGAM	NA	-1.58428	NA	-2.05558	NA	NA	NA	NA	2
TRABD2B	NA	1.61644	NA	NA	NA	1.48004	NA	NA	2
LBP	NA	2.06726	4.85355	NA	NA	NA	NA	NA	2
SYTL5	NA	-2.20065	NA	NA	1.66936	NA	NA	NA	2
CBLN2	NA	-4.81113	NA	-4.00017	NA	NA	NA	NA	2
MAGIX	NA	-1.97724	-3.40665	NA	NA	NA	NA	NA	2
GCAT	NA	-1.54326	NA	NA	NA	-1.25494	NA	NA	2
STARD8	NA	-1.05828	NA	NA	2.58834	NA	NA	NA	2
OSR2	NA	-1.35887	NA	NA	1.17626	NA	NA	NA	2
SALL1	NA	-1.22215	NA	2.64149	NA	NA	NA	NA	2
ANKRD31	NA	2.08248	NA	NA	NA	1.50839	NA	NA	2
ZNF311	NA	1.72947	NA	NA	NA	1.29386	NA	NA	2
TMEM238	NA	-1.29925	NA	NA	NA	-1.80063	NA	NA	2
CCDC157	NA	-1.51355	NA	NA	NA	-1.05385	NA	NA	2
TREM1	NA	5.28621	NA	NA	NA	NA	NA	1.2302	2
HK2	NA	2.26281	NA	1.98133	NA	NA	NA	NA	2
SLC22A15	NA	1.23339	NA	NA	NA	1.1445	NA	NA	2
IGFN1	NA	1.42285	NA	NA	NA	NA	NA	1.54619	2
TFF1	NA	1.40595	NA	NA	NA	NA	NA	2.18316	2
LAT2	NA	1.32351	NA	2.08801	NA	NA	NA	NA	2
RPL22L1	NA	1.31459	NA	1.83771	NA	NA	NA	NA	2
IL3RA	NA	3.60119	NA	NA	6.70032	NA	NA	NA	2
GLYCTK	NA	-1.13896	NA	NA	NA	-1.17032	NA	NA	2
APOL1	NA	1.4317	NA	NA	1.60822	NA	NA	NA	2
TF	NA	-2.18311	NA	-2.33805	NA	NA	NA	NA	2
NPY2R	NA	-3.61751	2.64547	NA	NA	NA	NA	NA	2
LRRC26	NA	-3.88974	NA	NA	NA	-2.79414	NA	NA	2
NSUN7	NA	1.40835	NA	NA	-1.06159	NA	NA	NA	2
PRODH	NA	-1.09019	NA	-1.24855	NA	NA	NA	NA	2
C12orf60	NA	1.11411	NA	NA	NA	1.04754	NA	NA	2
SYCE1L	NA	-1.06348	NA	NA	NA	-1.09091	NA	NA	2
ATP6V1C2	NA	4.82368	NA	1.15977	NA	NA	NA	NA	2
C9orf163	NA	-2.04892	1.45232	NA	NA	NA	NA	NA	2
CHST13	NA	-1.5093	NA	NA	NA	-1.18558	NA	NA	2
CUX2	NA	1.99314	NA	NA	NA	NA	NA	2.12584	2
QPRT	NA	-1.40848	NA	-2.8317	NA	NA	NA	NA	2
PARD6G	NA	-1.12876	NA	NA	NA	-1.64109	NA	NA	2
AKR1C4	NA	-2.02695	NA	-2.34834	NA	NA	NA	NA	2
IFFO1	NA	1.63544	NA	2.99789	NA	NA	NA	NA	2
SSPN	NA	1.38975	NA	NA	-1.286	NA	NA	NA	2
SNORD17	NA	-1.17379	1.75815	NA	NA	NA	NA	NA	2
DLL4	NA	-1.62918	2.96538	NA	NA	NA	NA	NA	2
PHF21B	NA	1.06507	NA	2.4469	NA	NA	NA	NA	2
SNAI3-AS1	NA	-1.14396	NA	NA	NA	-1.01845	NA	NA	2
ZFP82	NA	1.04224	NA	1.28494	NA	NA	NA	NA	2
C16orf71	NA	-2.03433	NA	NA	NA	-3.34437	NA	NA	2
PHOSPHO2	NA	1.18437	1.57864	NA	NA	NA	NA	NA	2
TNFAIP8L3	NA	1.24511	NA	1.10758	NA	NA	NA	NA	2
CD24	NA	-1.10752	NA	-1.88308	NA	NA	NA	NA	2
ST6GALNAC3	NA	1.14205	NA	NA	NA	1.12177	NA	NA	2
GIPR	NA	1.43154	NA	1.45047	NA	NA	NA	NA	2
PCDHA3	NA	-1.05973	NA	-2.38942	NA	NA	NA	NA	2
SYTL3	NA	1.19088	NA	NA	NA	1.56012	NA	NA	2
FLRT1	NA	4.47323	NA	NA	NA	5.51038	NA	NA	2
CCT6B	NA	1.02467	NA	NA	NA	1.45268	NA	NA	2
NRIP3	NA	1.21143	NA	NA	NA	NA	NA	1.14268	2
CHRNB4	NA	1.27456	NA	-3.75042	NA	NA	NA	NA	2
LRP1	NA	1.6177	NA	NA	-1.72189	NA	NA	NA	2
ANGPT1	NA	-1.73049	NA	-2.21933	NA	NA	NA	NA	2
NR1H4	NA	-1.66785	NA	-1.67904	NA	NA	NA	NA	2
ZBED2	NA	-2.33882	NA	NA	NA	NA	NA	1.08516	2
SEMA4B	NA	1.03005	NA	1.64773	NA	NA	NA	NA	2
MIR21	NA	2.92689	NA	NA	NA	2.95909	NA	NA	2
SNHG9	NA	-1.00856	NA	NA	NA	-1.28119	NA	NA	2
CCDC144B	NA	1.25334	NA	2.53566	NA	NA	NA	NA	2
TIMP3	NA	-1.13929	NA	1.43733	NA	NA	NA	NA	2
SLC29A4	NA	-1.09886	NA	-1.85229	NA	NA	NA	NA	2
NLRP1	NA	2.41759	NA	NA	NA	5.69307	NA	NA	2
PRDM8	NA	2.40981	NA	NA	1.96096	NA	NA	NA	2
DACT1	NA	1.11086	NA	2.82246	NA	NA	NA	NA	2
RAG1	NA	1.37253	NA	1.53847	NA	NA	NA	NA	2
TNIP3	NA	2.17433	NA	NA	NA	NA	NA	1.9079	2
MAF	NA	2.68137	NA	1.97877	NA	NA	NA	NA	2
PDZRN4	NA	-5.17628	NA	NA	NA	NA	NA	-3.1647	2
AMACR	NA	-1.07844	NA	NA	NA	-1.32775	NA	NA	2
KRT20	NA	-4.71913	-2.47161	NA	NA	NA	NA	NA	2
CLDND2	NA	-1.31668	NA	1.4117	NA	NA	NA	NA	2
LGALS2	NA	-5.07956	NA	NA	NA	NA	NA	1.64483	2
RASL11A	NA	-1.52122	NA	NA	NA	-1.62047	NA	NA	2
COX6B2	NA	1.50697	NA	NA	NA	2.20887	NA	NA	2
CRLF2	NA	2.41056	NA	NA	2.95468	NA	NA	NA	2
ENTPD2	NA	-1.30215	NA	NA	-1.5165	NA	NA	NA	2
IRF4	NA	2.32738	NA	2.67057	NA	NA	NA	NA	2
PDE2A	NA	1.02924	NA	1.02628	NA	NA	NA	NA	2
AMY2B	NA	1.30544	NA	1.53912	NA	NA	NA	NA	2
RPS6KL1	NA	-2.8849	NA	1.95626	NA	NA	NA	NA	2
HIST1H3J	NA	-4.54221	NA	4.81212	NA	NA	NA	NA	2
SNAI2	NA	2.06319	NA	NA	3.29684	NA	NA	NA	2
KIAA1614	NA	-1.90213	NA	1.12863	NA	NA	NA	NA	2
TSNAXIP1	NA	-1.25392	NA	NA	NA	-1.96681	NA	NA	2
CRYAB	NA	1.53731	NA	-1.1953	NA	NA	NA	NA	2
BNIP3L	NA	1.08375	NA	NA	-1.44391	NA	NA	NA	2
MAGI2-AS3	NA	1.35319	NA	1.91394	NA	NA	NA	NA	2
TIGD3	NA	-1.37575	NA	2.78359	NA	NA	NA	NA	2
GBX2	NA	-1.0951	NA	NA	NA	2.35464	NA	NA	2
SHISA9	NA	3.76779	NA	NA	NA	NA	NA	-1.83836	2
NDRG1	NA	2.26713	NA	NA	-2.19376	NA	NA	NA	2
DERL3	NA	-2.38439	NA	NA	NA	-1.74233	NA	NA	2
PLAG1	NA	1.72072	2.96982	NA	NA	NA	NA	NA	2
PRDM16	NA	1.1354	3.00077	NA	NA	NA	NA	NA	2
N4BP2L2-IT2	NA	1.25058	NA	2.03429	NA	NA	NA	NA	2
FERMT3	NA	-1.50097	NA	3.50811	NA	NA	NA	NA	2
TAT	NA	-4.29891	NA	3.02023	NA	NA	NA	NA	2
SNORD55	NA	-4.29444	3.30518	NA	NA	NA	NA	NA	2
HCAR3	NA	4.15689	NA	1.3462	NA	NA	NA	NA	2
SLC9B1	NA	2.85494	NA	NA	NA	4.12865	NA	NA	2
CLDN10	NA	1.99099	NA	NA	-2.28742	NA	NA	NA	2
L3MBTL4	NA	1.72042	NA	NA	NA	1.23354	NA	NA	2
ITGB2	NA	-1.10759	NA	NA	NA	NA	NA	1.10727	2
RPS10	NA	-1.7948	NA	NA	NA	-1.4274	NA	NA	2
MTNR1A	NA	-2.81662	NA	NA	NA	NA	NA	1.07246	2
ADORA1	NA	-1.00312	NA	NA	-2.29126	NA	NA	NA	2
DNAH11	NA	1.52344	NA	NA	1.58881	NA	NA	NA	2
CLEC4A	NA	3.99638	NA	5.18808	NA	NA	NA	NA	2
WTAPP1	NA	3.41927	NA	NA	NA	2.20884	NA	NA	2
DEGS2	NA	-1.41389	NA	-3.20113	NA	NA	NA	NA	2
ZNF404	NA	1.41158	NA	NA	NA	1.0982	NA	NA	2
SRD5A2	NA	2.95526	NA	NA	NA	NA	NA	-2.74844	2
CNTD1	NA	3.88071	NA	2.19373	NA	NA	NA	NA	2
HCLS1	NA	-3.09578	NA	3.3186	NA	NA	NA	NA	2
SNORD18C	NA	1.08509	1.88747	NA	NA	NA	NA	NA	2
CCL17	NA	4.27204	NA	NA	NA	3.44274	NA	NA	2
SEMA3G	NA	-2.11253	NA	NA	NA	NA	NA	-1.36964	2
MMP25	NA	1.31788	NA	NA	3.16379	NA	NA	NA	2
AGAP11	NA	1.74677	NA	NA	NA	2.73516	NA	NA	2
LCP1	NA	1.42091	NA	NA	NA	NA	NA	1.14384	2
TSPAN12	NA	-1.00644	NA	NA	NA	-1.47256	NA	NA	2
IGFL1	NA	1.12965	NA	NA	NA	NA	NA	-1.743	2
FAM221A	NA	1.45017	NA	2.84433	NA	NA	NA	NA	2
ELOVL3	NA	-2.0852	NA	NA	2.73379	NA	NA	NA	2
HCST	NA	2.2381	NA	3.23287	NA	NA	NA	NA	2
SLC5A10	NA	1.02165	NA	1.75028	NA	NA	NA	NA	2
PIGR	NA	-3.67754	NA	4.41512	NA	NA	NA	NA	2
DMGDH	NA	3.57174	NA	NA	2.76386	NA	NA	NA	2
ADAMTS8	NA	-1.20537	NA	-3.67314	NA	NA	NA	NA	2
ZC3H12B	NA	3.92404	NA	2.60646	NA	NA	NA	NA	2
SLC44A5	NA	1.27004	NA	-1.77178	NA	NA	NA	NA	2
MCF2L2	NA	2.58795	NA	2.86025	NA	NA	NA	NA	2
PYY2	NA	-1.64061	NA	NA	4.98326	NA	NA	NA	2
PCF11	NA	NA	2.2444	2.67686	NA	NA	NA	NA	2
IER2	NA	NA	2.29894	3.44461	NA	NA	NA	NA	2
ANXA2	NA	NA	-1.59235	-2.00471	NA	NA	NA	NA	2
EPM2AIP1	NA	NA	2.08786	2.17327	NA	NA	NA	NA	2
PSAP	NA	NA	-1.47952	-2.07146	NA	NA	NA	NA	2
ID1	NA	NA	2.29604	NA	NA	-1.99742	NA	NA	2
PPM1D	NA	NA	1.78242	1.63999	NA	NA	NA	NA	2
FBXW7	NA	NA	1.86396	2.17274	NA	NA	NA	NA	2
CDKN1B	NA	NA	1.85981	2.42742	NA	NA	NA	NA	2
PRR14	NA	NA	2.08108	2.49501	NA	NA	NA	NA	2
B3GALNT2	NA	NA	1.9355	1.8222	NA	NA	NA	NA	2
C5orf51	NA	NA	2.24201	3.04811	NA	NA	NA	NA	2
HIST1H2AK	NA	NA	4.43103	4.50565	NA	NA	NA	NA	2
CCNT1	NA	NA	1.66479	2.26571	NA	NA	NA	NA	2
ANXA1	NA	NA	-1.15888	-1.7296	NA	NA	NA	NA	2
ZNF281	NA	NA	1.32046	1.74039	NA	NA	NA	NA	2
NFKBIB	NA	NA	1.38922	1.98294	NA	NA	NA	NA	2
ZNF77	NA	NA	3.57984	5.22729	NA	NA	NA	NA	2
PTP4A1	NA	NA	1.15328	1.71167	NA	NA	NA	NA	2
ALDH1B1	NA	NA	-1.43393	-1.41985	NA	NA	NA	NA	2
SLC30A1	NA	NA	1.52372	1.30786	NA	NA	NA	NA	2
CLU	NA	NA	-1.0435	-1.33066	NA	NA	NA	NA	2
LAMB1	NA	NA	-1.03877	-1.22877	NA	NA	NA	NA	2
PNN	NA	NA	1.43161	2.53535	NA	NA	NA	NA	2
KRT19	NA	NA	-2.16916	-1.11364	NA	NA	NA	NA	2
ZNF830	NA	NA	2.22692	2.77436	NA	NA	NA	NA	2
PLEKHG2	NA	NA	1.58352	2.73113	NA	NA	NA	NA	2
HSPG2	NA	NA	-1.39119	-1.58273	NA	NA	NA	NA	2
RAP2B	NA	NA	1.56435	1.36756	NA	NA	NA	NA	2
AKR1B1	NA	NA	-1.04675	-1.82508	NA	NA	NA	NA	2
CEP85L	NA	NA	2.47578	2.1124	NA	NA	NA	NA	2
EMP3	NA	NA	-1.16353	NA	NA	-1.19052	NA	NA	2
MIR5047	NA	NA	1.94289	1.90716	NA	NA	NA	NA	2
ZNF596	NA	NA	3.24002	1.93113	NA	NA	NA	NA	2
RLIM	NA	NA	1.35426	1.93593	NA	NA	NA	NA	2
SOCS5	NA	NA	1.41061	1.80705	NA	NA	NA	NA	2
AEBP2	NA	NA	1.79723	2.45369	NA	NA	NA	NA	2
ZNF57	NA	NA	3.09398	5.81337	NA	NA	NA	NA	2
PLEKHF2	NA	NA	2.35071	2.11465	NA	NA	NA	NA	2
AHCY	NA	NA	-1.02704	-2.19465	NA	NA	NA	NA	2
ZNF79	NA	NA	1.92393	2.58294	NA	NA	NA	NA	2
MED13	NA	NA	1.29168	1.78152	NA	NA	NA	NA	2
MDM4	NA	NA	2.04879	2.33271	NA	NA	NA	NA	2
HBP1	NA	NA	1.49356	2.58149	NA	NA	NA	NA	2
APLP2	NA	NA	-1.09709	-1.933	NA	NA	NA	NA	2
ZRANB2	NA	NA	1.24413	1.14233	NA	NA	NA	NA	2
JUP	NA	NA	-1.26313	-1.04683	NA	NA	NA	NA	2
CELF1	NA	NA	1.22178	2.2207	NA	NA	NA	NA	2
CD81	NA	NA	-1.26248	-1.26717	NA	NA	NA	NA	2
DIDO1	NA	NA	1.07404	1.77875	NA	NA	NA	NA	2
UBR5	NA	NA	1.17013	1.46709	NA	NA	NA	NA	2
RBPJ	NA	NA	1.82941	2.97575	NA	NA	NA	NA	2
USPL1	NA	NA	1.65952	2.37611	NA	NA	NA	NA	2
SERPINH1	NA	NA	-1.17976	-2.29344	NA	NA	NA	NA	2
MIR3191	NA	NA	4.5291	NA	NA	3.90675	NA	NA	2
CAPZB	NA	NA	-1.1313	-1.28558	NA	NA	NA	NA	2
MARCKS	NA	NA	1.34487	2.30418	NA	NA	NA	NA	2
SERTAD3	NA	NA	1.28507	2.3174	NA	NA	NA	NA	2
CTDSP2	NA	NA	2.03448	2.12195	NA	NA	NA	NA	2
HNRNPH3	NA	NA	1.02593	1.61685	NA	NA	NA	NA	2
TPCN1	NA	NA	-1.10737	-1.28997	NA	NA	NA	NA	2
PPP1R18	NA	NA	1.46196	1.19065	NA	NA	NA	NA	2
RNF6	NA	NA	1.26654	2.05203	NA	NA	NA	NA	2
GPC1	NA	NA	-1.12673	-2.16811	NA	NA	NA	NA	2
ZNF12	NA	NA	1.44423	2.97115	NA	NA	NA	NA	2
MYSM1	NA	NA	1.78554	2.36144	NA	NA	NA	NA	2
MITD1	NA	NA	1.62827	1.59987	NA	NA	NA	NA	2
PIGA	NA	NA	1.87069	3.56386	NA	NA	NA	NA	2
BCAP31	NA	NA	-1.09042	-1.52615	NA	NA	NA	NA	2
KANSL1	NA	NA	1.33074	1.89179	NA	NA	NA	NA	2
CRKL	NA	NA	1.20207	1.66278	NA	NA	NA	NA	2
CHD1	NA	NA	1.22682	1.11456	NA	NA	NA	NA	2
LINC00115	NA	NA	3.16343	4.02643	NA	NA	NA	NA	2
RBBP6	NA	NA	1.24257	2.95958	NA	NA	NA	NA	2
ELL2	NA	NA	1.50394	1.68194	NA	NA	NA	NA	2
ZNF24	NA	NA	1.20055	1.78553	NA	NA	NA	NA	2
HMGN2	NA	NA	1.78074	1.01339	NA	NA	NA	NA	2
EAF1	NA	NA	1.15803	1.53874	NA	NA	NA	NA	2
UFM1	NA	NA	1.55315	1.82993	NA	NA	NA	NA	2
FAM126B	NA	NA	1.66589	1.98719	NA	NA	NA	NA	2
MFGE8	NA	NA	-1.67298	-1.7586	NA	NA	NA	NA	2
IKZF5	NA	NA	1.86558	2.1184	NA	NA	NA	NA	2
ACBD3	NA	NA	1.1651	1.11231	NA	NA	NA	NA	2
MSMO1	NA	NA	-1.20948	NA	-1.1092	NA	NA	NA	2
MBOAT7	NA	NA	-1.15806	-1.26386	NA	NA	NA	NA	2
MAFK	NA	NA	1.11152	1.35306	NA	NA	NA	NA	2
ZNF770	NA	NA	1.13718	1.09704	NA	NA	NA	NA	2
PURB	NA	NA	1.16141	1.64329	NA	NA	NA	NA	2
ZFC3H1	NA	NA	1.00429	1.775	NA	NA	NA	NA	2
ZNF211	NA	NA	2.26811	2.86829	NA	NA	NA	NA	2
FNIP1	NA	NA	1.3589	1.86011	NA	NA	NA	NA	2
SLCO2B1	NA	NA	-1.47101	-2.94916	NA	NA	NA	NA	2
ITGA6	NA	NA	-1.15919	-1.00419	NA	NA	NA	NA	2
ZBTB1	NA	NA	1.18023	1.55409	NA	NA	NA	NA	2
NECAP1	NA	NA	1.85357	2.55668	NA	NA	NA	NA	2
DBP	NA	NA	2.96327	3.80168	NA	NA	NA	NA	2
SMNDC1	NA	NA	1.41599	2.1518	NA	NA	NA	NA	2
BRPF1	NA	NA	1.26845	1.253	NA	NA	NA	NA	2
GPATCH8	NA	NA	1.05814	1.90587	NA	NA	NA	NA	2
LAMTOR3	NA	NA	1.57708	2.05696	NA	NA	NA	NA	2
PER3	NA	NA	2.55849	3.1756	NA	NA	NA	NA	2
ZBTB34	NA	NA	1.48439	1.51328	NA	NA	NA	NA	2
PRKXP1	NA	NA	3.33096	5.08776	NA	NA	NA	NA	2
WDR26	NA	NA	1.04053	1.80354	NA	NA	NA	NA	2
ZBTB11	NA	NA	1.13461	1.38748	NA	NA	NA	NA	2
ADNP2	NA	NA	1.24798	1.98731	NA	NA	NA	NA	2
TGS1	NA	NA	1.30925	1.44975	NA	NA	NA	NA	2
H1FX	NA	NA	1.28766	1.78776	NA	NA	NA	NA	2
IL6R	NA	NA	-1.33298	NA	NA	NA	NA	-1.08519	2
TOPORS	NA	NA	1.22754	1.306	NA	NA	NA	NA	2
ARID2	NA	NA	1.25959	1.15635	NA	NA	NA	NA	2
LYSMD3	NA	NA	1.78951	1.21893	NA	NA	NA	NA	2
PRPF39	NA	NA	1.36226	1.89395	NA	NA	NA	NA	2
SPRY1	NA	NA	1.88972	1.94705	NA	NA	NA	NA	2
RBM12B	NA	NA	1.26215	1.12325	NA	NA	NA	NA	2
P4HA2	NA	NA	-1.29763	-1.00329	NA	NA	NA	NA	2
EID2B	NA	NA	1.63535	1.63769	NA	NA	NA	NA	2
ZBTB5	NA	NA	1.26822	1.82116	NA	NA	NA	NA	2
UAP1L1	NA	NA	1.23502	2.12152	NA	NA	NA	NA	2
NDUFB8	NA	NA	-1.06156	-1.91748	NA	NA	NA	NA	2
SMC4	NA	NA	1.29802	1.08171	NA	NA	NA	NA	2
MEX3C	NA	NA	1.11905	2.23547	NA	NA	NA	NA	2
FOXA2	NA	NA	1.36766	1.43482	NA	NA	NA	NA	2
NGDN	NA	NA	1.21659	1.70094	NA	NA	NA	NA	2
TBK1	NA	NA	1.04289	1.79099	NA	NA	NA	NA	2
C3orf38	NA	NA	1.47498	2.23762	NA	NA	NA	NA	2
ESF1	NA	NA	1.24686	1.99822	NA	NA	NA	NA	2
ZNF503	NA	NA	1.51582	NA	2.1093	NA	NA	NA	2
ZNF845	NA	NA	2.12816	1.8354	NA	NA	NA	NA	2
ACO2	NA	NA	-1.00293	-1.4468	NA	NA	NA	NA	2
YY1AP1	NA	NA	1.06339	1.67267	NA	NA	NA	NA	2
EXOC8	NA	NA	1.45642	1.42403	NA	NA	NA	NA	2
EFNB1	NA	NA	1.54052	1.76377	NA	NA	NA	NA	2
USP36	NA	NA	1.012	1.42738	NA	NA	NA	NA	2
UTP15	NA	NA	1.5544	1.5694	NA	NA	NA	NA	2
LGALS1	NA	NA	-1.09106	-1.33293	NA	NA	NA	NA	2
NTNG2	NA	NA	4.18047	3.983	NA	NA	NA	NA	2
MPDU1	NA	NA	-1.02094	-1.43791	NA	NA	NA	NA	2
PLOD1	NA	NA	-1.0495	-1.38379	NA	NA	NA	NA	2
ZNF639	NA	NA	1.6662	1.9913	NA	NA	NA	NA	2
THAP2	NA	NA	1.93017	1.87542	NA	NA	NA	NA	2
TRMT10C	NA	NA	1.11125	1.58884	NA	NA	NA	NA	2
THUMPD1	NA	NA	1.05525	1.32023	NA	NA	NA	NA	2
DMTF1	NA	NA	1.16265	1.66617	NA	NA	NA	NA	2
KIAA1586	NA	NA	1.94404	1.41875	NA	NA	NA	NA	2
GPBP1L1	NA	NA	1.02118	1.69918	NA	NA	NA	NA	2
MYNN	NA	NA	1.21797	2.14733	NA	NA	NA	NA	2
MBIP	NA	NA	1.48089	2.44762	NA	NA	NA	NA	2
PHIP	NA	NA	1.076	1.04125	NA	NA	NA	NA	2
CA2	NA	NA	1.57431	1.55952	NA	NA	NA	NA	2
ZNF567	NA	NA	1.54958	2.18323	NA	NA	NA	NA	2
ZNF337	NA	NA	1.05523	1.47291	NA	NA	NA	NA	2
ZKSCAN8	NA	NA	1.18296	2.06505	NA	NA	NA	NA	2
USP15	NA	NA	1.00774	1.52832	NA	NA	NA	NA	2
CDH17	NA	NA	-1.60865	-2.13496	NA	NA	NA	NA	2
THAP1	NA	NA	1.64172	2.55661	NA	NA	NA	NA	2
C6orf62	NA	NA	1.04931	1.06386	NA	NA	NA	NA	2
INO80	NA	NA	1.16779	1.45406	NA	NA	NA	NA	2
GPX3	NA	NA	-1.74073	-1.58209	NA	NA	NA	NA	2
COL6A1	NA	NA	-1.78129	-1.07603	NA	NA	NA	NA	2
PNRC2	NA	NA	1.4052	1.89809	NA	NA	NA	NA	2
CRTC2	NA	NA	1.05426	2.34192	NA	NA	NA	NA	2
HCFC2	NA	NA	2.02555	2.07967	NA	NA	NA	NA	2
SUN2	NA	NA	-1.22183	NA	-1.38255	NA	NA	NA	2
ACAN	NA	NA	6.06962	3.76434	NA	NA	NA	NA	2
FOXC2	NA	NA	5.74574	4.81752	NA	NA	NA	NA	2
RNF11	NA	NA	1.08456	1.06551	NA	NA	NA	NA	2
RASSF8	NA	NA	2.13899	2.09703	NA	NA	NA	NA	2
ACAA2	NA	NA	-1.08738	-1.51715	NA	NA	NA	NA	2
ZCCHC10	NA	NA	1.50982	1.69757	NA	NA	NA	NA	2
APAF1	NA	NA	1.03575	1.06565	NA	NA	NA	NA	2
ZNF451	NA	NA	1.25408	1.36373	NA	NA	NA	NA	2
NXT2	NA	NA	1.62091	1.80968	NA	NA	NA	NA	2
THUMPD2	NA	NA	1.36112	1.92874	NA	NA	NA	NA	2
POU2F1	NA	NA	1.32979	1.90199	NA	NA	NA	NA	2
CEP95	NA	NA	1.02097	1.46562	NA	NA	NA	NA	2
SDE2	NA	NA	1.24877	1.56671	NA	NA	NA	NA	2
IRF2BPL	NA	NA	1.27101	1.14392	NA	NA	NA	NA	2
YAF2	NA	NA	1.57379	1.90932	NA	NA	NA	NA	2
TCN2	NA	NA	-2.14021	-1.11904	NA	NA	NA	NA	2
NIPBL	NA	NA	1.01333	1.56998	NA	NA	NA	NA	2
COL2A1	NA	NA	5.5237	5.48204	NA	NA	NA	NA	2
ZNF555	NA	NA	2.41787	3.98715	NA	NA	NA	NA	2
SMARCA2	NA	NA	-1.41056	-1.30904	NA	NA	NA	NA	2
VCPIP1	NA	NA	1.00785	NA	NA	1.00937	NA	NA	2
SNRNP27	NA	NA	1.0013	1.32297	NA	NA	NA	NA	2
PAXBP1	NA	NA	1.06514	1.41837	NA	NA	NA	NA	2
USP37	NA	NA	1.74992	2.91339	NA	NA	NA	NA	2
ICOSLG	NA	NA	1.84613	1.13467	NA	NA	NA	NA	2
SCAF4	NA	NA	1.06711	1.66138	NA	NA	NA	NA	2
ZNF776	NA	NA	1.4649	1.85758	NA	NA	NA	NA	2
FBN1	NA	NA	-1.68669	-1.0583	NA	NA	NA	NA	2
TTC32	NA	NA	1.37548	1.60826	NA	NA	NA	NA	2
RAB2B	NA	NA	1.32283	1.97849	NA	NA	NA	NA	2
KAT6A	NA	NA	1.06048	1.94064	NA	NA	NA	NA	2
PRPF38A	NA	NA	1.11304	1.29092	NA	NA	NA	NA	2
PGAP1	NA	NA	1.16871	1.00528	NA	NA	NA	NA	2
CD200R1	NA	NA	3.58896	4.85548	NA	NA	NA	NA	2
ADM5	NA	NA	2.2988	3.5249	NA	NA	NA	NA	2
ZNF518B	NA	NA	1.35918	1.5646	NA	NA	NA	NA	2
TIGD1	NA	NA	1.1167	1.22397	NA	NA	NA	NA	2
MED9	NA	NA	1.08417	1.96383	NA	NA	NA	NA	2
ZNF8	NA	NA	1.4413	2.14407	NA	NA	NA	NA	2
DCUN1D3	NA	NA	1.33135	2.00723	NA	NA	NA	NA	2
SIAH1	NA	NA	1.05191	1.83541	NA	NA	NA	NA	2
SPRY4	NA	NA	1.33329	1.44991	NA	NA	NA	NA	2
NBEAP1	NA	NA	3.33004	3.40442	NA	NA	NA	NA	2
ZNF579	NA	NA	1.16908	1.52839	NA	NA	NA	NA	2
EVPL	NA	NA	1.06853	1.79324	NA	NA	NA	NA	2
RCHY1	NA	NA	1.25514	1.79277	NA	NA	NA	NA	2
ZFP37	NA	NA	2.14185	1.682	NA	NA	NA	NA	2
FOXD3	NA	NA	2.73048	1.44586	NA	NA	NA	NA	2
NXT1	NA	NA	1.04371	1.66861	NA	NA	NA	NA	2
SORL1	NA	NA	-1.40752	-2.04202	NA	NA	NA	NA	2
BRD4	NA	NA	1.01547	1.44221	NA	NA	NA	NA	2
FGFR1OP2	NA	NA	1.05412	1.63568	NA	NA	NA	NA	2
SNAP25	NA	NA	1.34489	2.42738	NA	NA	NA	NA	2
KIF20B	NA	NA	1.32865	1.47274	NA	NA	NA	NA	2
RNF169	NA	NA	1.08929	1.47073	NA	NA	NA	NA	2
MIS12	NA	NA	1.00098	1.19662	NA	NA	NA	NA	2
TEF	NA	NA	1.60511	1.24388	NA	NA	NA	NA	2
RBM15	NA	NA	1.08651	1.99957	NA	NA	NA	NA	2
TSPYL4	NA	NA	1.26987	1.70556	NA	NA	NA	NA	2
USP21	NA	NA	1.18442	1.426	NA	NA	NA	NA	2
GRPEL2	NA	NA	1.20094	1.33259	NA	NA	NA	NA	2
ZNF134	NA	NA	1.24623	1.3272	NA	NA	NA	NA	2
ANXA2P2	NA	NA	-1.34287	-1.90179	NA	NA	NA	NA	2
KIAA2026	NA	NA	1.14761	1.60969	NA	NA	NA	NA	2
CDK5R1	NA	NA	1.62248	2.36767	NA	NA	NA	NA	2
ZNF614	NA	NA	1.69773	1.82912	NA	NA	NA	NA	2
GRAMD1B	NA	NA	-1.04438	NA	NA	-1.04852	NA	NA	2
TAF3	NA	NA	1.00999	1.37325	NA	NA	NA	NA	2
STK32B	NA	NA	-1.31624	-1.61848	NA	NA	NA	NA	2
LPAR6	NA	NA	2.02141	2.04806	NA	NA	NA	NA	2
SNORA28	NA	NA	4.47533	6.25167	NA	NA	NA	NA	2
CST1	NA	NA	-1.99025	-1.15577	NA	NA	NA	NA	2
FOXD1	NA	NA	1.53347	1.35299	NA	NA	NA	NA	2
PPIL4	NA	NA	1.1193	1.684	NA	NA	NA	NA	2
ANKRD49	NA	NA	1.3621	2.48844	NA	NA	NA	NA	2
MAPRE2	NA	NA	-1.14165	-2.33521	NA	NA	NA	NA	2
HOXA3	NA	NA	1.01351	1.50768	NA	NA	NA	NA	2
TNC	NA	NA	-1.84006	NA	1.28262	NA	NA	NA	2
SIM2	NA	NA	1.39478	1.69367	NA	NA	NA	NA	2
HOXB3	NA	NA	1.0127	1.51965	NA	NA	NA	NA	2
TSPO	NA	NA	-1.01462	-1.15238	NA	NA	NA	NA	2
ING3	NA	NA	1.60231	1.88982	NA	NA	NA	NA	2
SCARNA15	NA	NA	3.4991	2.65603	NA	NA	NA	NA	2
CHIC2	NA	NA	1.80513	2.55294	NA	NA	NA	NA	2
ZNF721	NA	NA	1.20731	1.66807	NA	NA	NA	NA	2
ARMCX5	NA	NA	1.43605	1.7825	NA	NA	NA	NA	2
DDX20	NA	NA	1.08265	1.09271	NA	NA	NA	NA	2
SPRED1	NA	NA	1.07204	1.04858	NA	NA	NA	NA	2
DCAF4L1	NA	NA	3.33664	4.62003	NA	NA	NA	NA	2
NBPF10	NA	NA	1.33808	2.35046	NA	NA	NA	NA	2
UBALD2	NA	NA	1.69502	1.0012	NA	NA	NA	NA	2
ZNF641	NA	NA	1.31952	1.78257	NA	NA	NA	NA	2
RRAD	NA	NA	1.49739	NA	2.95751	NA	NA	NA	2
FAM8A1	NA	NA	1.2259	1.50789	NA	NA	NA	NA	2
SNORA67	NA	NA	2.10138	1.85683	NA	NA	NA	NA	2
KRT15	NA	NA	-2.76934	NA	NA	NA	NA	-1.89288	2
CRY1	NA	NA	1.00507	2.19453	NA	NA	NA	NA	2
DUSP6	NA	NA	1.11254	1.51624	NA	NA	NA	NA	2
ZNF557	NA	NA	1.63446	1.82286	NA	NA	NA	NA	2
WDR89	NA	NA	1.21619	1.49163	NA	NA	NA	NA	2
GPR3	NA	NA	2.32147	2.68446	NA	NA	NA	NA	2
ING1	NA	NA	1.48185	1.80854	NA	NA	NA	NA	2
CDKL3	NA	NA	2.29645	1.9379	NA	NA	NA	NA	2
TRIM59	NA	NA	1.8047	1.343	NA	NA	NA	NA	2
TGIF2	NA	NA	1.54858	1.50269	NA	NA	NA	NA	2
MIR3685	NA	NA	4.86423	3.33097	NA	NA	NA	NA	2
GPD1L	NA	NA	-1.05836	-1.60159	NA	NA	NA	NA	2
ZNF510	NA	NA	1.42684	1.27626	NA	NA	NA	NA	2
ZNF280B	NA	NA	2.19649	2.81405	NA	NA	NA	NA	2
LDOC1	NA	NA	-1.01719	-1.2443	NA	NA	NA	NA	2
ADAM19	NA	NA	1.29805	NA	NA	NA	NA	1.5299	2
HSF2	NA	NA	1.21011	1.89042	NA	NA	NA	NA	2
AOC2	NA	NA	1.22701	2.14814	NA	NA	NA	NA	2
RASSF6	NA	NA	1.15791	NA	NA	1.33496	NA	NA	2
ZSCAN12P1	NA	NA	3.05486	3.41941	NA	NA	NA	NA	2
CPE	NA	NA	-1.34039	-1.51845	NA	NA	NA	NA	2
CHST2	NA	NA	2.32274	2.36136	NA	NA	NA	NA	2
ARHGAP40	NA	NA	6.33167	5.23993	NA	NA	NA	NA	2
ZNF461	NA	NA	1.22319	1.78616	NA	NA	NA	NA	2
SNORA52	NA	NA	2.71266	2.06547	NA	NA	NA	NA	2
NIPAL3	NA	NA	-1.26461	-1.65673	NA	NA	NA	NA	2
RNASEK	NA	NA	2.06011	3.82514	NA	NA	NA	NA	2
ZNRD1	NA	NA	1.53059	1.9213	NA	NA	NA	NA	2
EYA3	NA	NA	1.10887	1.35851	NA	NA	NA	NA	2
EIF4ENIF1	NA	NA	1.00186	1.02102	NA	NA	NA	NA	2
SNORA21	NA	NA	2.54567	2.39028	NA	NA	NA	NA	2
SNORD50B	NA	NA	3.15903	3.20079	NA	NA	NA	NA	2
ZNF34	NA	NA	1.54846	2.21368	NA	NA	NA	NA	2
TBX4	NA	NA	2.7246	2.18448	NA	NA	NA	NA	2
SNORD5	NA	NA	2.71168	1.58558	NA	NA	NA	NA	2
ZNF16	NA	NA	1.23411	1.33068	NA	NA	NA	NA	2
AGBL3	NA	NA	1.73676	2.13747	NA	NA	NA	NA	2
CACNG4	NA	NA	-1.34203	NA	-2.41791	NA	NA	NA	2
ZNF407	NA	NA	1.02171	1.11374	NA	NA	NA	NA	2
AMZ2P1	NA	NA	1.04977	1.21966	NA	NA	NA	NA	2
SNORA25	NA	NA	3.12731	2.93125	NA	NA	NA	NA	2
SNORD97	NA	NA	3.49082	1.76126	NA	NA	NA	NA	2
VGF	NA	NA	3.47654	2.05057	NA	NA	NA	NA	2
ELL	NA	NA	1.03255	2.31211	NA	NA	NA	NA	2
ZNF674-AS1	NA	NA	1.16063	3.23289	NA	NA	NA	NA	2
MBLAC2	NA	NA	1.20098	-1.64542	NA	NA	NA	NA	2
GOLGA6C	NA	NA	4.11032	4.46219	NA	NA	NA	NA	2
PCDHAC1	NA	NA	-1.30233	-1.24171	NA	NA	NA	NA	2
RSBN1	NA	NA	1.28004	2.64388	NA	NA	NA	NA	2
SNORD10	NA	NA	1.96993	3.34985	NA	NA	NA	NA	2
CD82	NA	NA	-1.38476	-1.54214	NA	NA	NA	NA	2
FOXQ1	NA	NA	1.04013	1.04343	NA	NA	NA	NA	2
MKRN3	NA	NA	1.392	2.25175	NA	NA	NA	NA	2
SNORA32	NA	NA	2.81223	1.75184	NA	NA	NA	NA	2
PAN3-AS1	NA	NA	1.93084	1.98574	NA	NA	NA	NA	2
TTC33	NA	NA	1.06545	1.15398	NA	NA	NA	NA	2
SUZ12P1	NA	NA	1.28643	2.14406	NA	NA	NA	NA	2
DPYSL5	NA	NA	-1.91944	-2.08719	NA	NA	NA	NA	2
KIAA1324	NA	NA	-1.17596	-2.08273	NA	NA	NA	NA	2
RAB3B	NA	NA	-1.17238	NA	NA	NA	NA	1.12371	2
CCL4	NA	NA	5.2004	4.04913	NA	NA	NA	NA	2
ZNF467	NA	NA	1.54317	1.2784	NA	NA	NA	NA	2
TERC	NA	NA	3.43912	NA	NA	3.38701	NA	NA	2
SNORA8	NA	NA	1.64829	2.22903	NA	NA	NA	NA	2
FBXO5	NA	NA	1.42418	1.41293	NA	NA	NA	NA	2
RPPH1	NA	NA	4.62846	1.74342	NA	NA	NA	NA	2
CDK8	NA	NA	1.06078	1.34306	NA	NA	NA	NA	2
TIFA	NA	NA	1.42025	1.28161	NA	NA	NA	NA	2
TMEM107	NA	NA	1.20285	NA	-1.10881	NA	NA	NA	2
ZNF799	NA	NA	1.92047	2.4977	NA	NA	NA	NA	2
NID2	NA	NA	-1.89436	NA	NA	-3.77793	NA	NA	2
C2orf66	NA	NA	3.41789	2.24481	NA	NA	NA	NA	2
AATK	NA	NA	2.38316	1.87034	NA	NA	NA	NA	2
SNORA63	NA	NA	3.18264	2.0273	NA	NA	NA	NA	2
ADCY9	NA	NA	-1.04931	-1.21154	NA	NA	NA	NA	2
OTUD3	NA	NA	1.18088	2.58073	NA	NA	NA	NA	2
SNORA40	NA	NA	1.63318	1.13826	NA	NA	NA	NA	2
ACOX3	NA	NA	-1.19319	-1.10709	NA	NA	NA	NA	2
TRIM29	NA	NA	-1.67689	NA	NA	1.43663	NA	NA	2
EFNA3	NA	NA	1.6678	3.39037	NA	NA	NA	NA	2
C12orf4	NA	NA	1.03763	1.81548	NA	NA	NA	NA	2
C3orf35	NA	NA	2.37977	3.74392	NA	NA	NA	NA	2
IGFBP7	NA	NA	-1.72988	-1.87979	NA	NA	NA	NA	2
ANKAR	NA	NA	1.84998	2.11694	NA	NA	NA	NA	2
RRAGB	NA	NA	1.01864	1.51404	NA	NA	NA	NA	2
CD300LB	NA	NA	6.58633	3.48505	NA	NA	NA	NA	2
RFPL3S	NA	NA	3.63674	5.25986	NA	NA	NA	NA	2
ZXDA	NA	NA	1.48711	NA	NA	1.04733	NA	NA	2
MYLK3	NA	NA	3.12189	3.7297	NA	NA	NA	NA	2
CATSPERD	NA	NA	4.22096	2.95614	NA	NA	NA	NA	2
ZEB1-AS1	NA	NA	1.30718	2.51751	NA	NA	NA	NA	2
RNF138P1	NA	NA	3.11246	3.50422	NA	NA	NA	NA	2
ZNF658	NA	NA	1.24474	1.34807	NA	NA	NA	NA	2
STK19	NA	NA	1.15213	1.34228	NA	NA	NA	NA	2
ATP6V1G2	NA	NA	2.99787	2.44232	NA	NA	NA	NA	2
ZNF720	NA	NA	1.15561	1.20685	NA	NA	NA	NA	2
HIST1H2BC	NA	NA	-2.12583	NA	2.0755	NA	NA	NA	2
FAM76B	NA	NA	1.28466	1.66428	NA	NA	NA	NA	2
CAPG	NA	NA	-1.13387	-1.1333	NA	NA	NA	NA	2
CCDC13	NA	NA	2.55805	4.18434	NA	NA	NA	NA	2
GJB4	NA	NA	-4.50172	NA	NA	1.14892	NA	NA	2
STMN4	NA	NA	4.33242	5.50112	NA	NA	NA	NA	2
HMMR	NA	NA	1.12548	NA	-1.15508	NA	NA	NA	2
SMG1P1	NA	NA	1.0246	1.21921	NA	NA	NA	NA	2
ZNF431	NA	NA	1.44688	NA	NA	1.33393	NA	NA	2
ZSWIM3	NA	NA	1.96132	NA	1.11507	NA	NA	NA	2
HYMAI	NA	NA	2.98856	4.90772	NA	NA	NA	NA	2
CCDC81	NA	NA	2.55838	3.14932	NA	NA	NA	NA	2
TTC21B	NA	NA	1.04495	1.11	NA	NA	NA	NA	2
NFKBIL1	NA	NA	1.04241	2.03902	NA	NA	NA	NA	2
ADPRHL1	NA	NA	-1.14873	-1.51376	NA	NA	NA	NA	2
ZNF165	NA	NA	1.63068	2.17318	NA	NA	NA	NA	2
CHEK2	NA	NA	1.1932	NA	1.08845	NA	NA	NA	2
WHAMMP3	NA	NA	1.76758	1.47578	NA	NA	NA	NA	2
ZNF155	NA	NA	1.2871	1.76672	NA	NA	NA	NA	2
SNORA68	NA	NA	2.80422	3.25394	NA	NA	NA	NA	2
SNORA31	NA	NA	2.94792	4.53074	NA	NA	NA	NA	2
ZNF225	NA	NA	1.12296	1.25405	NA	NA	NA	NA	2
ZNF432	NA	NA	2.33453	2.3547	NA	NA	NA	NA	2
NRXN3	NA	NA	-1.35475	-2.18445	NA	NA	NA	NA	2
SNORA20	NA	NA	4.84891	2.48664	NA	NA	NA	NA	2
ANKRD20A11P	NA	NA	2.08779	2.0949	NA	NA	NA	NA	2
RAB33B	NA	NA	1.08445	1.93197	NA	NA	NA	NA	2
TSPAN1	NA	NA	-2.43737	-1.27391	NA	NA	NA	NA	2
CD79A	NA	NA	1.81501	1.39716	NA	NA	NA	NA	2
CCR6	NA	NA	2.74225	4.33757	NA	NA	NA	NA	2
GDPGP1	NA	NA	1.355	1.31857	NA	NA	NA	NA	2
IFNA22P	NA	NA	3.16438	3.51049	NA	NA	NA	NA	2
ZFY	NA	NA	4.26461	1.72157	NA	NA	NA	NA	2
ZNF669	NA	NA	1.45362	1.78473	NA	NA	NA	NA	2
CMYA5	NA	NA	3.09113	2.8951	NA	NA	NA	NA	2
PMF1	NA	NA	-1.12245	-1.02872	NA	NA	NA	NA	2
[truncated: 4,776 more rows]

## Sheet: Table S2
Gene	log2 fold change of significant DEGs (FDR < 0.05)				Number of datasets in overlap for each DEG
	A549 (MOI 0.2 and 2) 475 DEGs	A549-ACE2 (MOI 0.2 and 2) 2708 DEGs	Calu-3 (MOI 0.3 and 2) 1698 DEGs	NHBE + hBO 362 DEGs
CFB	1.63352	1.46484	1.13686	1.72642	4
CCL20	1.2237	6.20164	3.81045	2.70401	4
BCL2A1	1.52643	1.79959	4.26064	2.06385	4
IFIT3	1.3724	3.37126	5.2614	1.45327	4
CXCL2	1.21189	6.0155	3.21481	1.78907	4
CXCL3	1.10951	4.86931	2.5965	2.42933	4
IFI44	2.90377	6.06701	2.79137	1.17756	4
OASL	1.70086	7.48582	4.27472	1.40578	4
LAMP3	1.74718	2.83988	4.13236	1.43067	4
TNFAIP3	1.02256	4.31614	5.01155	1.45511	4
IL1A	2.80297	5.50821	5.23793	1.70055	4
CCL5	1.86246	1.56006	6.79395	1.73172	4
BATF2	1.07983	2.69847	4.37714	1.04445	4
XAF1	4.51324	5.31997	4.24258	1.86535	4
BIRC3	1.12548	1.50189	2.21529	1.42407	4
MX1	2.93219	3.69839	3.64196	2.543	4
IL6	2.64527	3.37427	6.17347	2.58498	4
EGOT	2.78528	2.67737	3.31003	1.22717	4
CSF3	1.62907	3.94054	6.75908	4.59308	4
IRF7	1.85166	4.00329	3.31606	1.31347	4
IFI44L	3.91433	4.94624	3.41188	2.61195	4
OAS2	2.2018	4.39861	4.56038	1.36391	4
RASD1	-1.58684	2.34618	2.6788	1.85029	4
ICAM1	1.53803	2.501	2.94001	1.73445	4
ELN	-1.76661	-1.30737	-1.62505	-2.09556	4
SAA2	1.95625	2.38902	2.16076	2.05652	4
IFITM1	1.90853	4.75909	4.01703	1.89097	4
CSF2	1.98264	4.30575	6.88265	3.7814	4
IFI6	2.06934	2.59215	1.69008	2.58102	4
ISG15	1.8537	2.40689	2.8911	1.71387	4
IL23A	1.08779	3.1646	2.02627	2.38543	4
TNF	1.03452	5.24439	7.49308	1.72899	4
DDX60	1.90113	2.61562	2.7368	NA	3
DTX3L	1.12515	1.12345	2.40754	NA	3
IFIH1	1.4956	3.18674	4.06769	NA	3
SAMD9L	1.729	3.09546	3.83791	NA	3
C1R	1.20682	1.66972	2.15787	NA	3
DDX60L	1.09743	1.26109	3.46067	NA	3
GBP1	1.3803	1.155	4.01615	NA	3
PHF11	1.08124	1.24544	2.07801	NA	3
DDX58	1.26321	1.89813	2.93995	NA	3
GBP3	1.10696	1.06098	1.87183	NA	3
IRF9	1.43352	1.55137	1.6779	NA	3
IFI16	1.29995	2.17221	3.20911	NA	3
HSD11B1	2.2135	NA	2.47413	1.16483	3
FAM131B	1.32319	NA	-1.0152	-1.10841	3
APOL6	1.00402	1.48771	3.42897	NA	3
NT5DC2	-1.05576	-1.34686	-1.46475	NA	3
IL1B	1.86537	NA	3.88352	2.23029	3
PTX3	2.35765	3.62932	3.86237	NA	3
CLEC4E	1.61788	2.5614	3.24575	NA	3
PARP9	1.20658	1.77998	2.19636	NA	3
BMPER	1.46477	1.76828	2.98787	NA	3
TRIM36	1.36608	1.34717	1.48805	NA	3
SAA1	1.3899	NA	1.16825	2.15	3
PGP	-1.05028	-1.01344	-1.23063	NA	3
TXNIP	3.59879	1.18909	3.01779	NA	3
PARP8	2.41121	1.29678	1.39594	NA	3
STON1	1.51953	2.7214	NA	-1.05971	3
KCNT2	1.52247	1.91272	1.94787	NA	3
SLC22A18AS	-1.03073	-1.61282	-1.53914	NA	3
TNFRSF9	1.23982	1.46252	5.13212	NA	3
EREG	1.71197	2.83974	1.52179	NA	3
NR4A3	-1.01252	3.6673	6.02131	NA	3
THEMIS2	1.18862	3.56756	2.91756	NA	3
ZNF426	1.08192	1.26983	1.02518	NA	3
ADPRM	1.06834	1.11611	1.44636	NA	3
MYPN	1.07868	NA	1.25406	1.18246	3
VIL1	-2.10692	-1.5408	-1.36826	NA	3
PI3	1.13572	-1.18748	NA	1.56828	3
N4BP3	1.40813	2.76521	1.20605	NA	3
FASN	-1.25562	-1.07084	-1.27945	NA	3
TPPP3	-1.11299	-1.99418	-1.56367	NA	3
FILIP1L	1.38828	2.37941	1.63098	NA	3
PARP10	1.0328	2.72366	2.41627	NA	3
C15orf48	1.50656	NA	1.71777	1.65009	3
TIPARP	1.35367	2.66078	2.95667	NA	3
ROS1	1.09838	1.5581	-1.38983	NA	3
SELE	2.64701	6.60944	5.65514	NA	3
CREB5	1.06918	2.53984	2.96191	NA	3
SEMA7A	1.14607	1.19968	1.95296	NA	3
NR4A1	-1.35641	2.99043	1.31671	NA	3
FADS2	-1.04534	-1.70255	-1.33708	NA	3
SPON2	-1.41237	1.94595	NA	-1.01214	3
ARRDC4	1.49073	1.07467	1.92064	NA	3
SLC25A10	-1.26927	-1.38173	-1.32157	NA	3
GBP4	1.79978	3.90672	4.93621	NA	3
PCSK9	-1.04455	-1.07209	-1.5503	NA	3
GADD45A	1.08952	1.56998	1.97563	NA	3
MCM5	-1.22094	-1.46737	-1.19333	NA	3
DEGS2	-1.01639	-2.21879	-1.27439	NA	3
DDC	-2.30209	-2.19824	-2.00178	NA	3
DHCR24	-1.04716	-1.67702	-1.26151	NA	3
ADH1C	-3.10046	-2.3174	-1.39626	NA	3
RUNX2	1.16075	1.97508	3.38779	NA	3
ALDH1L2	1.57515	-1.52148	2.40022	NA	3
NACAD	1.26698	4.30172	1.17567	NA	3
NDUFA4L2	1.24894	-1.91945	2.72143	NA	3
RASGEF1B	-2.18432	2.80271	1.80138	NA	3
HIST3H2BB	-1.77543	6.20834	1.84599	NA	3
TM4SF4	-1.14086	-2.23787	-1.94462	NA	3
ADM2	2.19582	1.0942	1.79404	NA	3
CLDN2	-1.02307	-1.53208	-2.14549	NA	3
LST1	1.87594	3.63382	7.08136	NA	3
ACHE	1.16082	2.31684	2.10163	NA	3
ATF3	1.31	3.05173	5.35745	NA	3
KLHDC7B	2.64933	NA	4.1935	1.35962	3
NRGN	-1.18463	-2.39162	-1.39907	NA	3
SERPINA10	-2.39546	4.50692	6.62193	NA	3
TLR2	1.33729	1.90393	1.02978	NA	3
NCALD	-1.21484	-1.03233	3.54307	NA	3
ROCK1P1	2.03217	2.26832	2.16352	NA	3
DNAH17	1.17017	2.76607	4.28979	NA	3
DUOX2	1.20202	NA	4.24516	1.0465	3
SERPINE1	1.19091	NA	4.5117	1.2662	3
ANGPTL4	1.13786	1.18621	1.75411	NA	3
C3	NA	1.26272	1.31641	1.36899	3
CXCL1	NA	4.22204	1.32942	1.48256	3
MAFF	NA	4.08402	1.77222	1.29222	3
IRAK2	NA	1.62633	2.24149	1.19995	3
MX2	NA	5.20508	5.12952	2.97823	3
EPSTI1	NA	3.84792	4.17714	1.45085	3
IFI27	NA	3.34251	2.28783	2.62391	3
BST2	NA	1.71333	4.91019	1.1502	3
GBP5	NA	2.45941	7.7292	2.10972	3
INHBA	NA	2.7945	3.21975	2.19999	3
IL7	NA	2.36272	1.25311	1.26369	3
SLC1A3	NA	5.1062	2.82921	-1.03548	3
CMPK2	NA	6.52625	4.79256	2.46	3
IDO1	NA	3.632	5.13383	1.24418	3
TNFSF14	NA	1.96223	2.68475	1.53968	3
IFIT1	NA	3.88181	4.51977	1.56877	3
CXCL11	NA	5.22731	6.8954	2.37784	3
CXCL10	NA	3.1646	7.14225	2.17294	3
PTGS2	NA	2.28913	2.82738	1.00092	3
CCL2	NA	2.93872	2.21002	1.52278	3
ZC3H12A	NA	2.78002	1.585	1.39114	3
NFKBIA	NA	4.26262	4.26883	1.05497	3
IER3	NA	3.45264	1.34724	1.10149	3
PDE4B	NA	1.90305	3.77365	2.10043	3
GDF15	NA	1.85755	1.66592	1.16879	3
NEURL3	NA	3.47988	2.59535	1.39256	3
POU2F2	NA	2.59903	1.47328	1.21742	3
LTB	NA	4.47721	2.84321	1.54781	3
CENPA	NA	2.10723	-1.15331	-1.05657	3
HLA-F	NA	2.5524	2.43648	1.16276	3
BMP2	NA	1.62831	2.19073	1.09695	3
SNAI1	NA	1.8958	1.70557	1.46666	3
LIF	NA	1.77479	1.56228	1.56255	3
HSH2D	NA	3.39138	2.61625	1.0266	3
RND1	NA	1.36443	3.01358	1.73295	3
ADAM8	NA	1.43917	1.32971	1.12453	3
PDGFD	NA	-1.47086	-2.02198	-1.09289	3
HERC6	NA	1.32452	2.17013	1.01373	3
PLAUR	NA	1.0281	2.6982	1.13825	3
IFI35	NA	1.38478	2.71207	1.23322	3
RERG	NA	-1.15619	-1.75959	-1.2505	3
IL4I1	NA	1.71766	2.2819	1.75752	3
PROC	NA	-1.09151	-1.46389	-1.07745	3
OAS3	NA	1.21421	2.72115	1.3121	3
OAS1	NA	1.46457	3.10493	1.26252	3
MIF	-1.11528	NA	-1.08148	NA	2
RAP1GAP	-1.0282	-1.27535	NA	NA	2
C1S	1.14522	NA	2.24169	NA	2
SERPINB7	2.13477	NA	2.83859	NA	2
FUT1	4.12754	NA	1.93884	NA	2
MMP10	2.7369	2.04153	NA	NA	2
SERPINA3	1.02232	NA	NA	1.91084	2
SAT1	1.31171	NA	1.65913	NA	2
SERPINB4	2.90229	1.978	NA	NA	2
MAP2	1.61816	NA	1.16223	NA	2
APOL1	1.08626	NA	1.00473	NA	2
OLR1	1.59502	NA	2.81542	NA	2
GCAT	-1.12185	NA	-1.08126	NA	2
PRADC1	-1.22167	NA	-1.3673	NA	2
KRT4	-2.49012	-2.94397	NA	NA	2
ASS1	1.10651	1.05283	NA	NA	2
USP53	1.03452	NA	1.00751	NA	2
ANKRD31	1.81781	NA	1.10698	NA	2
GBP2	1.05402	NA	1.15487	NA	2
TAF1D	1.02039	1.82171	NA	NA	2
MXD3	-1.31889	NA	-1.39949	NA	2
LBP	1.99867	2.83355	NA	NA	2
SAPCD2	-1.05306	NA	-1.57822	NA	2
KLHDC7A	-1.3316	-1.0486	NA	NA	2
MXI1	1.03493	1.17179	NA	NA	2
SFRP4	-1.2058	-1.01926	NA	NA	2
RBMS3	1.49578	NA	2.5496	NA	2
CXXC5	-1.02057	-1.07588	NA	NA	2
DLL4	-1.10439	1.38006	NA	NA	2
MVK	-1.03178	NA	-1.26164	NA	2
ANKS4B	-1.92998	NA	-1.67638	NA	2
WDR90	-1.02771	NA	-1.09	NA	2
ZC3H6	1.09205	NA	1.02698	NA	2
C21orf58	-1.13558	NA	-1.35697	NA	2
CIDEC	-1.29126	-1.74383	NA	NA	2
PCDHGC3	-1.18621	-1.89086	NA	NA	2
EPS8L3	-1.1224	NA	NA	2.3511	2
BCAS1	-1.57612	-2.23774	NA	NA	2
GREM1	1.80081	NA	3.05056	NA	2
HABP2	-2.46552	-2.22028	NA	NA	2
LRRC45	-1.09635	NA	-1.69575	NA	2
QPRT	-1.01532	-2.95546	NA	NA	2
ZNF311	1.25717	NA	1.14144	NA	2
BEST1	1.53938	NA	2.23383	NA	2
TMPO-AS1	-1.04296	NA	-1.00137	NA	2
UPK3B	-1.31065	-1.05368	NA	NA	2
CPAMD8	1.90424	1.40012	NA	NA	2
RASGRF2	1.20725	1.19856	NA	NA	2
H19	-1.50588	-1.40436	NA	NA	2
CHGA	-1.18476	NA	2.61986	NA	2
TMEM156	1.34504	NA	1.08013	NA	2
TCTE3	-1.63371	2.87905	NA	NA	2
VNN1	1.21993	NA	NA	1.72122	2
GRIN2C	-1.33594	1.38493	NA	NA	2
TK1	-1.21553	-1.72065	NA	NA	2
S100A9	2.74257	1.44119	NA	NA	2
C9orf163	-1.16168	1.27071	NA	NA	2
SLFN5	1.38182	NA	2.70596	NA	2
IL20RB	1.26534	2.73142	NA	NA	2
VSTM1	1.45247	NA	4.10204	NA	2
HK2	1.25083	1.32004	NA	NA	2
PCDH1	1.73972	1.07671	NA	NA	2
HIST1H2BJ	-1.04635	1.27542	NA	NA	2
SLC6A15	1.36882	1.49659	NA	NA	2
ADH6	-2.00457	NA	-2.38951	NA	2
FGFR2	-1.33515	-1.36735	NA	NA	2
INHBE	2.57112	NA	3.94354	NA	2
FAM129A	1.88457	NA	1.2162	NA	2
H2AFX	-1.30798	NA	-1.38244	NA	2
AMY2B	1.01245	1.16718	NA	NA	2
KIAA1614	-1.1669	1.32414	NA	NA	2
B4GALNT2	1.03191	NA	NA	1.32452	2
MYLK2	-1.3119	NA	-1.66326	NA	2
NEB	-1.8159	NA	-2.24961	NA	2
GPX2	-1.43816	-1.44379	NA	NA	2
SPDEF	-1.76195	NA	-1.36367	NA	2
IGFBP1	1.59224	1.63952	NA	NA	2
LAMA4	1.10914	-1.26589	NA	NA	2
MTHFD2	1.12821	NA	1.46889	NA	2
RIBC2	-1.07031	NA	-1.4799	NA	2
CCBE1	1.29609	NA	1.29967	NA	2
SYTL5	-1.21812	NA	1.02886	NA	2
SLC16A9	1.18123	NA	2.27401	NA	2
ZMIZ1-AS1	1.31791	1.85183	NA	NA	2
TMEM255A	1.88442	-2.07464	NA	NA	2
CCDC96	-1.02496	NA	-1.36428	NA	2
STC2	1.9681	NA	2.22255	NA	2
CFI	-1.31742	NA	-1.01466	NA	2
SOX2	-1.33669	1.4858	NA	NA	2
CRABP2	1.00263	1.07191	NA	NA	2
KRT20	-1.80828	-2.24975	NA	NA	2
ABCA10	1.38671	2.08213	NA	NA	2
NOTCH4	-1.09624	NA	NA	1.68022	2
SLC16A6	1.57373	NA	3.98675	NA	2
SYNGR4	-1.24968	-2.27639	NA	NA	2
ASNS	1.55943	NA	2.36366	NA	2
SNAI2	1.78334	NA	2.3852	NA	2
IRF4	1.81961	2.71852	NA	NA	2
C16orf71	-1.0151	NA	-2.72744	NA	2
CLDN10	1.68826	NA	-1.39144	NA	2
NPY2R	-1.73822	1.54395	NA	NA	2
DLX2	-1.67796	4.85862	NA	NA	2
SERPINA6	-1.37635	-1.07012	NA	NA	2
PRG4	1.25339	1.9721	NA	NA	2
CDH16	-1.57878	-2.90364	NA	NA	2
MAGI2-AS3	1.00911	1.64576	NA	NA	2
SSTR5-AS1	-2.03585	-2.08334	NA	NA	2
TNFRSF1B	1.1965	NA	2.09062	NA	2
HIST1H2BL	-1.45047	3.17123	NA	NA	2
MTNR1A	-1.58447	NA	NA	1.08104	2
CD22	1.06824	NA	2.01513	NA	2
OLFML3	-1.1568	-1.28376	NA	NA	2
SERPING1	1.25732	3.41015	NA	NA	2
MIR21	1.6605	NA	2.75885	NA	2
ULBP1	1.54615	NA	2.4922	NA	2
DHRS2	1.44416	NA	1.97873	NA	2
HLA-DMB	-1.34961	-1.0261	NA	NA	2
HIST1H2BO	-1.16641	1.82501	NA	NA	2
CNTNAP2	-1.25508	-1.57676	NA	NA	2
GNG10	-1.42569	-2.68093	NA	NA	2
FGF19	1.81095	NA	3.90893	NA	2
SYK	-1.0353	-2.08543	NA	NA	2
NLRP1	1.65947	NA	4.872	NA	2
CLEC2B	1.58167	1.68362	NA	NA	2
HTR2B	-1.32947	-1.86138	NA	NA	2
LRRC26	-1.43214	NA	-2.61367	NA	2
TMSB15A	-1.70263	NA	-1.30332	NA	2
SCARA5	-1.39124	-1.57226	NA	NA	2
CCDC170	1.13242	NA	NA	-1.01337	2
CFP	-1.74366	3.0312	NA	NA	2
LOX	2.04103	2.42771	NA	NA	2
DERL3	-1.08538	NA	-1.20241	NA	2
ESRRB	-1.42501	3.17043	NA	NA	2
HCLS1	-1.97202	2.58269	NA	NA	2
SLC9B1	1.94172	NA	3.32234	NA	2
TXNDC5	-1.13244	NA	-1.22947	NA	2
TF	-1.13637	-1.60202	NA	NA	2
KLK10	1.34727	1.76543	NA	NA	2
PALM2	1.09206	NA	-1.16916	NA	2
ITGB3	1.37846	1.1184	NA	NA	2
MEFV	2.18914	NA	3.64386	NA	2
AGAP11	1.18208	NA	2.84511	NA	2
FLRT1	1.43182	NA	4.25838	NA	2
LTC4S	-1.8218	NA	-2.17705	NA	2
GNRH2	-1.96788	NA	3.06807	NA	2
SLC26A9	-1.09317	NA	NA	1.27983	2
KRT6B	NA	NA	2.09856	1.25701	2
IL32	NA	NA	1.68476	1.57389	2
C1QTNF1	NA	NA	2.76991	2.34493	2
METTL7A	NA	NA	-3.171	-1.14908	2
HBEGF	NA	NA	2.4076	1.35484	2
CRYM	NA	1.04087	-1.97462	NA	2
HEPHL1	NA	2.08486	NA	1.68751	2
DDIT4L	NA	1.20211	NA	1.51302	2
L3MBTL4	NA	NA	1.18247	1.16212	2
HMGN2P46	NA	NA	2.58003	2.24629	2
MRGPRX3	NA	3.06759	NA	2.09537	2
VNN3	NA	NA	2.98698	1.62671	2
MMP13	NA	3.81298	5.37714	NA	2
NOD2	NA	3.04866	3.21101	NA	2
TYMP	NA	NA	2.3824	1.17925	2
RHCG	NA	NA	2.43231	1.33887	2
SPOCK3	NA	-1.97393	NA	-1.20668	2
XDH	NA	NA	1.0648	1.29781	2
EBI3	NA	NA	1.22253	2.57002	2
SLC13A5	NA	NA	1.45007	1.0932	2
SYT8	NA	NA	-1.26648	-1.08805	2
IL7R	NA	NA	4.15513	1.17715	2
SLC7A2	NA	1.51825	NA	1.80789	2
CYP4B1	NA	NA	1.1368	-1.1618	2
DNAH9	NA	NA	1.46287	-1.29077	2
KIRREL2	NA	1.48011	1.59795	NA	2
GSTA1	NA	-2.13154	NA	-1.09584	2
IL17C	NA	NA	3.80803	2.40599	2
PLA2G4C	NA	NA	3.16415	1.60939	2
PDCD1LG2	NA	NA	5.39484	1.11365	2
ETV7	NA	3.02195	5.25254	NA	2
NCF1	NA	1.97206	NA	1.30032	2
SAA4	NA	NA	2.79023	2.06553	2
CDH5	NA	NA	3.26707	2.50838	2
KIT	NA	NA	4.07438	-1.51264	2
SEMA3G	NA	NA	-1.60579	-1.64726	2
SOSTDC1	NA	NA	-2.38874	-1.43487	2
APOBEC3A	NA	2.81062	NA	2.05589	2
CHAC1	NA	NA	3.15627	1.28924	2
SLC5A5	NA	2.69618	4.74196	NA	2
ASXL3	NA	NA	2.36773	-1.73743	2
TSLP	NA	NA	2.35066	-1.27642	2
GJB1	NA	-2.69254	-1.71257	NA	2
SNX31	NA	4.64394	NA	-1.24469	2
GPC3	NA	NA	-1.2292	-1.34719	2
DUOXA2	NA	NA	4.42681	1.98554	2
C11orf96	NA	6.67711	3.13012	NA	2
DDIT3	NA	3.38175	1.11578	NA	2
JUNB	NA	3.53914	1.3453	NA	2
NFKBIZ	NA	3.8436	2.25714	NA	2
BBC3	NA	2.69933	3.61204	NA	2
IER5	NA	2.56324	1.03196	NA	2
ARRDC3	NA	3.71246	3.8887	NA	2
EFNA1	NA	4.40649	1.27739	NA	2
NFAT5	NA	1.5292	1.28165	NA	2
KDM6B	NA	3.28147	1.37417	NA	2
NR1D1	NA	4.7803	1.99535	NA	2
BCL3	NA	2.73349	1.86012	NA	2
FOXN2	NA	2.24185	1.293	NA	2
NFKBIE	NA	3.5907	1.32652	NA	2
SOCS3	NA	2.25424	1.31319	NA	2
CPEB2	NA	1.46495	1.68213	NA	2
ARID4B	NA	2.17012	1.27983	NA	2
FOSB	NA	4.41009	2.89956	NA	2
INO80D	NA	2.1115	1.32691	NA	2
CCNL1	NA	3.34269	1.45571	NA	2
DUSP8	NA	3.94726	2.06941	NA	2
ZBTB10	NA	3.54013	1.85568	NA	2
PNRC1	NA	1.93161	1.839	NA	2
MAP3K8	NA	1.74592	3.21212	NA	2
ZFP36	NA	3.33636	2.97878	NA	2
ARC	NA	3.12204	2.11504	NA	2
SKIL	NA	2.14406	1.15324	NA	2
FDPS	NA	-1.37719	-1.35493	NA	2
FOS	NA	2.63218	1.86113	NA	2
EGR2	NA	5.53771	3.14861	NA	2
CEP350	NA	1.47248	1.0735	NA	2
REL	NA	3.07591	1.773	NA	2
CPEB4	NA	1.49735	1.55936	NA	2
ZNF436	NA	2.71704	1.17677	NA	2
PDE4D	NA	1.32793	1.51008	NA	2
FRS2	NA	2.64373	1.69919	NA	2
TUBA1A	NA	-1.32286	-1.50053	NA	2
CYLD	NA	2.50168	2.07337	NA	2
ZEB2	NA	2.42086	4.9515	NA	2
IRF1	NA	2.70361	3.63136	NA	2
ZNF292	NA	2.53967	1.38174	NA	2
PPP1R15A	NA	4.05474	4.65174	NA	2
COL4A2	NA	-1.5353	1.45522	NA	2
EGR1	NA	8.06537	2.34112	NA	2
MIER1	NA	2.01965	1.16352	NA	2
H1F0	NA	1.29193	1.52033	NA	2
CLK1	NA	2.97245	1.18262	NA	2
TSC22D2	NA	1.36485	1.34668	NA	2
ICAM5	NA	4.12295	1.69012	NA	2
INTS6	NA	2.06476	1.09158	NA	2
PMAIP1	NA	1.5991	3.15047	NA	2
KLF10	NA	2.82393	1.8778	NA	2
SIX4	NA	2.79377	1.13676	NA	2
YOD1	NA	1.7786	1.02529	NA	2
PPP4R4	NA	5.91893	3.68202	NA	2
VIM	NA	-1.22366	-1.24232	NA	2
SNIP1	NA	2.71882	1.02351	NA	2
HLA-B	NA	2.35462	1.42095	NA	2
PPP1R15B	NA	1.94945	1.26641	NA	2
TET2	NA	1.81681	1.36528	NA	2
DHCR7	NA	-1.36656	-1.69978	NA	2
MALAT1	NA	1.92967	1.15202	NA	2
ZBTB21	NA	2.63604	1.49478	NA	2
CLUHP3	NA	3.25805	1.50455	NA	2
COL4A1	NA	-1.38365	6.88851	NA	2
CREBRF	NA	3.09806	1.70451	NA	2
SERTAD2	NA	2.78736	1.36966	NA	2
ZNF805	NA	2.14635	1.01178	NA	2
ATAD2B	NA	1.30446	1.14592	NA	2
CD83	NA	2.18283	NA	1.06803	2
FDFT1	NA	-1.13143	-1.39302	NA	2
RIMKLB	NA	1.43953	1.22199	NA	2
HIST2H2BF	NA	3.88454	1.80425	NA	2
RSRC2	NA	2.56082	1.33866	NA	2
BTG2	NA	1.74326	1.24488	NA	2
ZC3H12C	NA	1.67216	1.99029	NA	2
ZBED5	NA	1.02019	1.04698	NA	2
ZBTB43	NA	3.09971	1.77898	NA	2
CSRNP1	NA	3.29857	2.672	NA	2
CSF1	NA	1.56047	2.71236	NA	2
ZNF267	NA	2.8451	1.78672	NA	2
JMJD1C	NA	1.44963	1.00837	NA	2
RLF	NA	2.91794	1.03889	NA	2
NEAT1	NA	2.342	1.60029	NA	2
ZNF92	NA	1.82855	1.49277	NA	2
HIVEP2	NA	2.18269	2.52719	NA	2
SCD	NA	-1.15755	-1.30629	NA	2
MXD1	NA	2.19893	2.25894	NA	2
PRDM1	NA	1.82577	3.7296	NA	2
ETV3	NA	1.92577	1.83739	NA	2
RELB	NA	1.96423	1.782	NA	2
PLD6	NA	2.75935	1.08465	NA	2
ZNF627	NA	2.25344	1.58186	NA	2
NFKB1	NA	2.56853	1.37502	NA	2
ZNF484	NA	1.97509	1.17736	NA	2
HIVEP1	NA	2.28835	1.60935	NA	2
TICAM1	NA	1.72074	1.48095	NA	2
EBP	NA	-1.29212	-1.31694	NA	2
SLC9A3R1	NA	-1.43115	-1.16549	NA	2
B3GNT5	NA	2.11557	1.59679	NA	2
RBAK	NA	1.74959	1.01994	NA	2
NSDHL	NA	-1.34019	-1.25013	NA	2
MAST4	NA	1.47309	1.98184	NA	2
CNOT4	NA	1.63211	1.00195	NA	2
PPTC7	NA	1.9559	1.00593	NA	2
DUSP16	NA	1.30021	1.35527	NA	2
HIST1H4E	NA	2.75296	2.25582	NA	2
BCL10	NA	2.06281	1.15469	NA	2
ANKRD12	NA	1.93596	1.29095	NA	2
DYRK1A	NA	1.16061	1.07012	NA	2
SCARA3	NA	-1.30276	-1.27629	NA	2
KDM6A	NA	1.41839	1.64146	NA	2
NAMPT	NA	1.012	1.3904	NA	2
EPC1	NA	1.92608	1.40937	NA	2
ZNF596	NA	2.57186	1.27854	NA	2
CLK4	NA	1.70238	1.41633	NA	2
JAK2	NA	1.73236	2.51048	NA	2
ZSCAN12	NA	1.75955	1.00808	NA	2
CYP1A1	NA	4.9262	5.38975	NA	2
MYLK	NA	-1.00495	-1.05535	NA	2
SMCHD1	NA	1.63809	1.22013	NA	2
PIM3	NA	1.66104	1.30907	NA	2
PROX1	NA	3.60351	3.59002	NA	2
ZNF14	NA	2.46272	1.43109	NA	2
CDK17	NA	1.16129	1.44358	NA	2
DEPDC7	NA	1.2646	1.76075	NA	2
PAPOLG	NA	1.25255	1.06667	NA	2
CHD2	NA	2.71541	1.54017	NA	2
JUN	NA	2.31212	2.66577	NA	2
GPCPD1	NA	1.58836	1.71781	NA	2
HDAC9	NA	2.57171	1.90155	NA	2
ZNF543	NA	1.82627	1.42626	NA	2
SDC4	NA	1.20121	1.27523	NA	2
LYST	NA	1.24457	1.06401	NA	2
NR4A2	NA	1.98094	1.90762	NA	2
RCAN1	NA	1.38573	1.8276	NA	2
IFNB1	NA	6.95268	11.5565	NA	2
PARD6B	NA	1.40884	1.57038	NA	2
NFKB2	NA	1.96659	1.62014	NA	2
ARL5B	NA	2.42359	1.77619	NA	2
ZNF217	NA	1.25014	1.43621	NA	2
ZNF317	NA	1.57127	1.0053	NA	2
GPBP1	NA	1.64628	1.0139	NA	2
TLK2	NA	1.55059	1.20857	NA	2
NR3C1	NA	1.08483	1.22295	NA	2
BTN2A2	NA	1.29307	1.36473	NA	2
BAZ1A	NA	1.09512	1.08219	NA	2
HIF1A-AS2	NA	4.65843	3.49664	NA	2
ZNF254	NA	1.14516	1.33926	NA	2
HSPA6	NA	1.50926	1.56253	NA	2
MIPEP	NA	-1.35161	-1.06107	NA	2
GNA13	NA	1.06341	1.13755	NA	2
ARL4D	NA	1.4522	1.57348	NA	2
PRKDC	NA	-1.05031	-1.02614	NA	2
ABL2	NA	1.90882	1.29075	NA	2
HSD17B7P2	NA	1.8402	1.0842	NA	2
SLC1A4	NA	-1.21162	1.23697	NA	2
SRFBP1	NA	1.90308	1.31514	NA	2
STAT1	NA	1.18282	2.29185	NA	2
GADD45B	NA	1.84955	1.84143	NA	2
MIR3191	NA	4.1935	4.277	NA	2
LGALS9	NA	2.28099	2.7451	NA	2
TM7SF2	NA	-1.59157	-1.64547	NA	2
SLCO5A1	NA	3.79067	3.11008	NA	2
SLIRP	NA	-1.14789	-1.09145	NA	2
IFITM2	NA	1.45953	3.5637	NA	2
PELI1	NA	1.05332	1.9083	NA	2
IPCEF1	NA	4.15502	3.65661	NA	2
RNF111	NA	1.02636	1.11116	NA	2
TLE4	NA	1.03159	1.36597	NA	2
PHB	NA	-1.78505	-1.03758	NA	2
ADI1	NA	-1.55609	-1.16026	NA	2
ZCCHC2	NA	1.39551	1.36624	NA	2
UBN2	NA	1.00403	1.33896	NA	2
LATS1	NA	1.02483	1.08985	NA	2
BDKRB2	NA	1.61596	2.87928	NA	2
PCK1	NA	3.06879	4.47069	NA	2
CDKN2AIP	NA	1.50884	1.01516	NA	2
ZNF562	NA	1.01784	1.04671	NA	2
GALM	NA	-1.12497	-1.1821	NA	2
HAS2	NA	1.9496	1.92234	NA	2
RASGRP1	NA	1.81596	1.75431	NA	2
SHMT1	NA	-1.35274	-1.23415	NA	2
COMMD9	NA	-1.03153	-1.03575	NA	2
KLF9	NA	1.28379	1.73021	NA	2
SAP30	NA	1.15394	-1.07475	NA	2
NCOA7	NA	1.13173	2.87525	NA	2
UBASH3A	NA	4.6741	6.30761	NA	2
SNX16	NA	1.50352	1.24669	NA	2
ZNF462	NA	1.34679	1.51987	NA	2
RFPL3S	NA	4.47089	2.25718	NA	2
ZNF107	NA	1.52759	1.38421	NA	2
COMMD4	NA	-1.07532	-1.13878	NA	2
ZNF296	NA	2.15024	1.2342	NA	2
FST	NA	1.86525	2.05104	NA	2
MORC3	NA	1.25328	1.12151	NA	2
XRN1	NA	1.60869	2.14139	NA	2
PLK3	NA	1.13161	1.19887	NA	2
TMX4	NA	-1.17443	-1.02983	NA	2
CETN2	NA	-1.16149	-1.10384	NA	2
ODF3B	NA	1.69157	1.46721	NA	2
ANKRD33B	NA	1.35242	2.48612	NA	2
FOSL2	NA	1.06906	1.46191	NA	2
FGF18	NA	3.92683	2.52831	NA	2
ZNF222	NA	1.80971	1.33421	NA	2
PPM1K	NA	2.47595	2.6142	NA	2
SIK1	NA	1.02294	1.42056	NA	2
PINLYP	NA	3.82351	2.60938	NA	2
UBE2L6	NA	1.26866	2.73414	NA	2
CYP27A1	NA	2.76468	NA	2.22798	2
NRCAM	NA	-1.19782	1.20936	NA	2
MVD	NA	-1.0705	-1.65399	NA	2
PER2	NA	1.84273	1.41406	NA	2
KLKP1	NA	4.06656	4.00614	NA	2
PIM1	NA	2.16215	1.25505	NA	2
NDUFB2	NA	-1.28104	-1.02904	NA	2
CCL4	NA	4.40708	4.4938	NA	2
GEM	NA	2.97678	1.70407	NA	2
LIG4	NA	1.16314	1.14866	NA	2
B3GNT7	NA	1.91752	1.91551	NA	2
ZNF460	NA	1.60466	1.17557	NA	2
SOCS2	NA	1.27839	1.6504	NA	2
GLP2R	NA	-1.54749	1.83862	NA	2
KCNN1	NA	3.83865	6.00141	NA	2
CFLAR-AS1	NA	2.37865	1.84665	NA	2
CRIP2	NA	-1.27104	-1.48757	NA	2
SLC25A1	NA	-1.12077	-1.01802	NA	2
HADH	NA	-1.4766	-1.01283	NA	2
NKX3-1	NA	2.03392	2.70512	NA	2
SDC1	NA	-1.12397	-1.05851	NA	2
SUMF1	NA	-1.24214	-1.12592	NA	2
CCDC174	NA	1.47463	1.14993	NA	2
DCP1A	NA	1.53881	1.50028	NA	2
IL11	NA	1.91381	1.98292	NA	2
SLC38A4	NA	5.64012	-1.85512	NA	2
STAT5A	NA	1.81658	1.8004	NA	2
SUMO4	NA	3.38477	3.15409	NA	2
TRANK1	NA	2.07474	3.62399	NA	2
ARL14	NA	2.48966	1.04348	NA	2
ZNF503	NA	1.1467	1.38681	NA	2
ANKAR	NA	1.96755	NA	-1.05497	2
BHLHE40	NA	1.74803	1.06561	NA	2
HCP5	NA	1.59977	2.4507	NA	2
USP43	NA	2.36424	1.5304	NA	2
TBC1D22B	NA	1.48884	1.31892	NA	2
GATA6	NA	1.51595	1.25826	NA	2
PSG4	NA	-1.7257	1.14993	NA	2
ZNF708	NA	1.40701	1.12599	NA	2
ATF4	NA	1.36817	1.0935	NA	2
FSD1L	NA	1.08297	2.14629	NA	2
MB21D2	NA	1.78129	2.87819	NA	2
ATP6V0E2	NA	-1.45809	-1.13887	NA	2
RICTOR	NA	1.29907	1.67987	NA	2
ZBTB20	NA	2.48718	2.59555	NA	2
REC8	NA	2.1944	1.48521	NA	2
CTDSPL	NA	-1.19974	-1.05538	NA	2
BCAT1	NA	-1.07933	2.7285	NA	2
DHFR	NA	-1.37343	-1.04953	NA	2
STX1B	NA	1.32111	1.80708	NA	2
PSAT1	NA	-1.33132	1.38855	NA	2
GATM	NA	-1.89501	-1.38084	NA	2
PLK1	NA	1.48277	-1.21471	NA	2
LPA	NA	5.79257	5.20977	NA	2
PML	NA	1.27694	2.28368	NA	2
NGFR	NA	2.64596	2.94483	NA	2
ZNFX1	NA	1.43118	2.83118	NA	2
IKZF3	NA	4.28143	2.95908	NA	2
NDUFB7	NA	-1.23644	-1.0007	NA	2
POLR2L	NA	-1.23386	-1.02309	NA	2
FOSL1	NA	1.84562	1.39249	NA	2
WDR34	NA	-1.04404	-1.2572	NA	2
GCH1	NA	1.26859	1.08087	NA	2
NPTX1	NA	1.89313	3.36893	NA	2
HDX	NA	1.56253	2.25194	NA	2
DLL1	NA	3.30982	2.62605	NA	2
C18orf25	NA	1.09918	1.20536	NA	2
MALL	NA	-1.28932	-1.18249	NA	2
NUAK2	NA	1.24136	3.81478	NA	2
HOGA1	NA	-1.50756	-1.92471	NA	2
HIST1H1E	NA	3.00657	1.85272	NA	2
TIAM2	NA	1.62842	1.13044	NA	2
PIEZO2	NA	-1.00249	2.23442	NA	2
ZNF488	NA	-1.50902	-1.60783	NA	2
ASB9	NA	-1.48408	-1.03366	NA	2
ANKRD18B	NA	1.07157	1.08402	NA	2
ETS2	NA	1.58979	1.91033	NA	2
TMEM97	NA	-1.0727	-1.2876	NA	2
OTUD1	NA	1.62123	3.58406	NA	2
OGFRL1	NA	1.33414	1.22132	NA	2
ZNF274	NA	1.00821	1.17063	NA	2
MSC	NA	1.513	NA	2.12297	2
KLF4	NA	1.56085	3.78452	NA	2
SLC25A28	NA	1.43082	1.70841	NA	2
UBE2Q2P1	NA	1.60086	1.03297	NA	2
INE1	NA	1.91168	1.18742	NA	2
TRIM31	NA	1.14772	1.2249	NA	2
MOBP	NA	4.49353	2.05024	NA	2
SLC25A25	NA	1.24583	1.07772	NA	2
FOXO1	NA	1.6403	1.70237	NA	2
PIN1	NA	-1.0302	-1.03803	NA	2
ADM	NA	1.59702	1.81414	NA	2
ANXA9	NA	-1.46365	-1.67486	NA	2
SOCS1	NA	3.07078	2.74273	NA	2
ZNF300P1	NA	3.77848	4.32572	NA	2
WHAMM	NA	1.18049	1.01756	NA	2
ZNF431	NA	1.12388	1.02058	NA	2
AREG	NA	1.41337	1.07392	NA	2
HIST1H1D	NA	2.76119	2.16381	NA	2
DUSP1	NA	1.43591	3.40573	NA	2
PYGM	NA	2.14887	1.30478	NA	2
ICAM4	NA	3.79885	2.51012	NA	2
IFIT5	NA	1.37779	3.08132	NA	2
POLD2	NA	-1.24083	-1.03008	NA	2
ZNF333	NA	1.65009	1.02629	NA	2
IRF2	NA	1.15532	1.22191	NA	2
MIR221	NA	2.0323	1.18185	NA	2
EBLN2	NA	2.0764	1.30182	NA	2
RGS16	NA	1.89592	1.36574	NA	2
DCHS1	NA	2.24909	2.57452	NA	2
LMO2	NA	3.93705	3.78665	NA	2
HLA-L	NA	1.88679	1.33594	NA	2
SATB2	NA	1.04909	1.02616	NA	2
CDC14A	NA	1.70947	1.85187	NA	2
THEM6	NA	-1.18237	-1.16872	NA	2
SUGT1P1	NA	2.53364	1.9219	NA	2
OGFR	NA	1.02513	1.3743	NA	2
VEGFA	NA	1.20984	1.11209	NA	2
UCP2	NA	-1.39244	-1.77043	NA	2
HELB	NA	1.48026	1.61198	NA	2
SAMD9	NA	2.5034	2.95095	NA	2
MATN1-AS1	NA	2.00814	1.3724	NA	2
RNF19B	NA	1.26658	1.89738	NA	2
KPNA5	NA	1.53138	1.08779	NA	2
ZNF675	NA	1.18569	1.08392	NA	2
GLCCI1	NA	1.27438	1.86013	NA	2
MCM6	NA	-1.32869	-1.18445	NA	2
PARP12	NA	1.7447	2.33532	NA	2
SEC24A	NA	1.41801	1.06107	NA	2
ZNF44	NA	2.16744	1.29673	NA	2
CNFN	NA	-1.64298	-1.3054	NA	2
STX11	NA	2.02013	3.46931	NA	2
SPRY2	NA	1.14809	2.27274	NA	2
FGFR3	NA	-1.476	-1.61439	NA	2
DTYMK	NA	-1.08563	-1.1253	NA	2
HIST1H2BG	NA	5.10683	2.30088	NA	2
IFITM3	NA	2.08386	2.03034	NA	2
DHX58	NA	2.94179	3.68085	NA	2
MEG9	NA	1.65661	4.41334	NA	2
HIST1H3E	NA	1.89892	1.62903	NA	2
EGR3	NA	4.48996	2.59877	NA	2
SNRNP25	NA	-1.1865	-1.37971	NA	2
TSPAN8	NA	-1.59854	-1.18967	NA	2
ZNF697	NA	1.03502	1.42256	NA	2
ALOXE3	NA	1.61918	1.19372	NA	2
IFIT2	NA	4.01087	5.98241	NA	2
CPEB3	NA	1.37337	2.49481	NA	2
TTLL6	NA	-1.02529	2.46489	NA	2
COL11A2	NA	1.43624	2.17656	NA	2
TRAF1	NA	1.35401	4.58703	NA	2
OXTR	NA	-1.30146	1.04337	NA	2
GUCA1B	NA	2.44071	1.4754	NA	2
C19orf66	NA	1.41808	1.59786	NA	2
INHBB	NA	-1.02811	NA	-1.15336	2
FAM151B	NA	1.8987	1.12284	NA	2
RNLS	NA	-1.34158	-1.03885	NA	2
ID1	NA	1.31156	-1.09176	NA	2
KHK	NA	-1.33877	-1.32222	NA	2
SOX9	NA	1.39202	1.2532	NA	2
SLC6A12	NA	2.6894	2.17816	NA	2
ISG20	NA	1.27081	3.76398	NA	2
PLSCR1	NA	1.39932	1.18298	NA	2
MEIS1	NA	1.69353	1.22527	NA	2
NKD2	NA	1.03137	2.44795	NA	2
TNS1	NA	1.35454	1.29645	NA	2
NEDD9	NA	1.07788	1.69049	NA	2
TNFSF13B	NA	2.31876	3.91045	NA	2
GIMAP2	NA	2.97508	2.79461	NA	2
MAK	NA	1.85464	2.16414	NA	2
ABTB2	NA	1.30858	1.06465	NA	2
PDZD2	NA	3.46225	4.01114	NA	2
CX3CL1	NA	1.83512	3.70744	NA	2
DMBX1	NA	2.31574	-2.06411	NA	2
MZT2B	NA	-1.00675	-1.10533	NA	2
HELZ2	NA	2.60293	3.18584	NA	2
NKAIN1	NA	1.59934	3.5697	NA	2
CCDC116	NA	1.52096	1.98771	NA	2
PSTPIP2	NA	2.42273	1.60959	NA	2
TRIM38	NA	1.29338	1.68611	NA	2
ZNF441	NA	3.04176	1.65269	NA	2
METTL7B	NA	-1.42235	-1.67321	NA	2
CAMK1G	NA	2.988	4.09233	NA	2
SLC6A13	NA	2.04393	2.30881	NA	2
CAT	NA	-1.0731	-1.30309	NA	2
BTN2A3P	NA	1.351	1.25314	NA	2
AGBL2	NA	1.073	1.17513	NA	2
USP18	NA	2.1928	4.0716	NA	2
IL22RA1	NA	1.71804	2.16873	NA	2
SNCAIP	NA	2.12099	2.06144	NA	2
FFAR4	NA	-2.28001	-1.07238	NA	2
KLF6	NA	1.57163	2.4498	NA	2
SCNN1G	NA	3.98635	2.59369	NA	2
SAMHD1	NA	1.44125	2.48895	NA	2
NPR1	NA	-1.2539	3.36126	NA	2
ANGPT2	NA	4.52238	5.76869	NA	2
GMPR	NA	3.48388	2.70562	NA	2
NHLH1	NA	1.86537	1.22785	NA	2
ZNF853	NA	1.65632	NA	-1.18424	2
RORA	NA	1.47846	1.35114	NA	2
NUDT8	NA	-1.23602	-1.56879	NA	2
APOBEC3F	NA	1.29001	1.78766	NA	2
ACTN2	NA	3.76784	6.04051	NA	2
TLR3	NA	1.06858	2.65123	NA	2
MYD88	NA	1.03706	1.64273	NA	2
DPYSL3	NA	-1.015	-1.08886	NA	2
DUSP10	NA	1.31159	1.63039	NA	2
LINC00654	NA	3.38499	4.19908	NA	2
PMS2CL	NA	1.15191	1.14939	NA	2
RAB30	NA	1.20138	1.74866	NA	2
ADORA2A	NA	1.05424	1.70498	NA	2
APOL3	NA	2.80743	3.83058	NA	2
RNF112	NA	1.44297	1.39411	NA	2
RSAD2	NA	5.29301	5.43435	NA	2
STAT2	NA	1.84022	2.43954	NA	2
MIR568	NA	2.12729	2.49152	NA	2
SERINC4	NA	1.5291	3.09692	NA	2
SOCS2-AS1	NA	1.3511	2.98593	NA	2
HERC5	NA	2.22722	3.86993	NA	2
ETS1	NA	1.10247	1.23591	NA	2
SIDT1	NA	1.26963	3.6	NA	2
NES	NA	-1.55255	NA	1.40555	2
ZNF502	NA	1.06727	1.27657	NA	2
SECTM1	NA	2.19653	2.68533	NA	2
MOB3C	NA	1.13448	1.44259	NA	2
MLKL	NA	1.15192	1.20551	NA	2
CENPI	NA	-1.5069	-1.27287	NA	2
PIK3AP1	NA	1.21664	1.13123	NA	2
HCG27	NA	1.95195	2.40773	NA	2
HAND1	NA	3.34077	5.80199	NA	2
ANXA13	NA	-1.20028	-3.10707	NA	2
APOBEC3D	NA	1.40316	1.85095	NA	2
IL15RA	NA	1.36212	2.27548	NA	2
FIBCD1	NA	-1.0087	-1.15562	NA	2
ZBP1	NA	3.16366	6.49107	NA	2
CCDC74A	NA	-1.53234	-1.8954	NA	2
ARAP2	NA	1.11589	1.26051	NA	2
CD274	NA	2.61861	5.14579	NA	2
ZSWIM4	NA	1.04074	1.43025	NA	2
MBNL1-AS1	NA	-2.11423	NA	-1.04779	2
MATN4	NA	2.57579	1.56394	NA	2
HIST4H4	NA	1.78188	2.05332	NA	2
SP110	NA	1.96915	2.61578	NA	2
C5orf56	NA	1.7267	2.68517	NA	2
CXXC4	NA	1.00546	2.51888	NA	2
FBXO6	NA	1.09368	2.14637	NA	2
TNFSF10	NA	2.67799	3.10829	NA	2
NLRC5	NA	1.74672	4.32467	NA	2
PLEKHA4	NA	3.15895	1.98818	NA	2
AIF1L	NA	-1.68602	-1.44109	NA	2
CYP2B6	NA	2.97919	1.45265	NA	2
IL10RA	NA	1.87312	4.48842	NA	2
LTA	NA	3.52126	3.19695	NA	2
RPLP0P2	NA	2.02891	2.687	NA	2
RAB26	NA	-1.34156	-2.29061	NA	2
ZNF501	NA	2.93995	1.22047	NA	2
PARP14	NA	1.25828	2.92057	NA	2
PIGZ	NA	-1.62795	-1.13412	NA	2
C6orf58	NA	1.765	3.32954	NA	2
MAFB	NA	2.07446	2.17124	NA	2
UGT2B15	NA	-2.45489	-1.47861	NA	2
KRT15	NA	-1.25362	NA	-1.42074	2
BRICD5	NA	-1.09181	-1.04839	NA	2
OVOL1	NA	2.64708	1.06289	NA	2
C1orf162	NA	2.46575	1.31163	NA	2
TRIM22	NA	1.57909	5.71919	NA	2
RUFY4	NA	3.08391	4.87194	NA	2
RGS4	NA	3.39522	NA	-1.01067	2
PNPT1	NA	1.12194	2.25255	NA	2
TBX15	NA	1.3995	3.03828	NA	2
CYP2J2	NA	2.20129	1.43799	NA	2
CYP2C9	NA	1.38234	NA	-1.15424	2
LINC00605	NA	1.83743	2.11884	NA	2
SLC6A20	NA	-1.61344	-1.34246	NA	2
RGS9BP	NA	1.29889	-1.80732	NA	2
DAPP1	NA	1.91839	2.17281	NA	2
SLC17A4	NA	-2.49376	-1.80715	NA	2
FLT3LG	NA	1.68289	2.40153	NA	2
HLA-DOB	NA	2.01096	2.37511	NA	2
PRRT3-AS1	NA	-1.13513	-1.13331	NA	2
SSTR2	NA	2.28172	2.19405	NA	2
SMPD3	NA	1.5573	1.8422	NA	2
DTNA	NA	1.34961	1.01167	NA	2
BTC	NA	1.69893	1.00596	NA	2
CENPM	NA	-1.13789	-1.16399	NA	2
GABRR2	NA	2.21659	2.30011	NA	2
HIST1H2BN	NA	1.25347	1.48008	NA	2
REEP6	NA	-1.0536	-1.14185	NA	2
MCF2L2	NA	2.22376	2.32138	NA	2
C6orf222	NA	2.88945	2.80582	NA	2
ENKUR	NA	1.38937	2.53253	NA	2
F3	NA	1.29506	1.38066	NA	2
ADCY5	NA	-1.25302	-1.54514	NA	2
RTP4	NA	3.74928	3.81154	NA	2
ALDOB	NA	2.04858	NA	1.57009	2
PRG2	NA	2.65877	1.84415	NA	2
SAMSN1	NA	1.62293	1.50059	NA	2
IL17RB	NA	-1.0802	-1.29654	NA	2
TMPRSS3	NA	2.1083	1.11121	NA	2
GPR132	NA	-1.45353	1.82387	NA	2
ZNF671	NA	1.3833	1.1824	NA	2
SCGN	NA	-2.41423	-3.20947	NA	2
TEX14	NA	1.34878	3.73735	NA	2
LEKR1	NA	1.33478	1.09703	NA	2
UBA7	NA	3.11141	2.3794	NA	2
SP8	NA	1.84923	7.5886	NA	2
TEX15	NA	-1.11181	-1.97386	NA	2
TMEM171	NA	2.01367	NA	1.10416	2
STARD8	NA	1.19119	1.3455	NA	2
ATP4A	NA	3.26615	6.06163	NA	2
AGR3	NA	-2.38643	-1.54279	NA	2
ELFN1	NA	2.39951	NA	-1.27466	2
TRIM69	NA	2.20063	2.48466	NA	2
ST7-AS1	NA	1.83921	1.506	NA	2
GRM8	NA	2.0024	3.13694	NA	2
SYT5	NA	1.83384	-1.20401	NA	2
FMO5	NA	-1.03327	NA	-1.01533	2
NAV2	NA	1.23004	2.5058	NA	2
JAM2	NA	2.42967	2.90636	NA	2
ZFPM2	NA	1.491	4.57193	NA	2
UBD	NA	NA	1.86923	1.40173	2
G0S2	NA	NA	3.59121	1.53722	2
CH25H	NA	NA	8.64067	-1.13095	2
TNIP1	NA	NA	1.14856	1.26971	2
TNFAIP2	NA	NA	2.69211	1.28441	2
KYNU	NA	NA	1.27394	1.06105	2
WFDC5	NA	NA	6.99061	1.14875	2
EDN1	NA	NA	1.56234	1.18971	2
SYNPO2	NA	NA	4.49622	-1.19146	2
EDN2	NA	NA	3.09726	-1.0927	2
CXCL9	NA	NA	5.17497	1.86486	2
CACNA1D	NA	NA	-1.40909	-1.63296	2
MT2A	NA	NA	3.55	1.04883	2
GLI2	NA	NA	2.06181	-1.51276	2
CYP4F3	NA	NA	-1.15742	-1.13478	2
ADAMTS6	NA	NA	2.46344	1.3851	2
IL2RG	NA	NA	1.70317	1.29101	2
TUB	NA	NA	-1.23289	-1.02092	2
RAB42	NA	NA	1.42851	1.56496	2
DNAJC22	NA	NA	-1.07935	-1.02295	2
KNDC1	NA	NA	1.81467	-1.40807	2
KCNG1	NA	NA	1.28266	1.07081	2
OLFM1	NA	NA	-1.01662	1.77799	2
CES1P1	NA	NA	3.39704	2.24237	2
MUC13	NA	NA	1.12868	1.80193	2
DNAH12	NA	NA	1.18145	-1.0079	2
AOX1	1.31606	NA	NA	NA	1
NECAB2	-1.14787	NA	NA	NA	1
COL20A1	-1.01967	NA	NA	NA	1
SERPINB3	2.71751	NA	NA	NA	1
RAB39B	1.84115	NA	NA	NA	1
GDPD1	1.05891	NA	NA	NA	1
HORMAD1	1.01182	NA	NA	NA	1
ABI3BP	1.68397	NA	NA	NA	1
MMP1	2.51171	NA	NA	NA	1
BCRP3	-1.19763	NA	NA	NA	1
CDKN2C	-1.34478	NA	NA	NA	1
RASGRP2	2.33946	NA	NA	NA	1
ECM2	3.77594	NA	NA	NA	1
EPHB3	-2.25692	NA	NA	NA	1
TREM1	3.9949	NA	NA	NA	1
AMH	-1.05078	NA	NA	NA	1
CLDN1	1.03125	NA	NA	NA	1
DPEP1	-2.57102	NA	NA	NA	1
CLEC2D	1.03135	NA	NA	NA	1
LIPE	-1.10507	NA	NA	NA	1
ZDHHC8P1	-1.20127	NA	NA	NA	1
SNTB1	1.07791	NA	NA	NA	1
PXDN	1.07669	NA	NA	NA	1
NT5E	1.00602	NA	NA	NA	1
KCTD19	1.03796	NA	NA	NA	1
PTPRE	1.41597	NA	NA	NA	1
SHC2	1.00287	NA	NA	NA	1
MYO1A	-2.09853	NA	NA	NA	1
PPP1R1C	1.34821	NA	NA	NA	1
PIK3R3	-1.38811	NA	NA	NA	1
GSTO2	1.00377	NA	NA	NA	1
DOK3	-1.14362	NA	NA	NA	1
DISP2	-1.11341	NA	NA	NA	1
SLC25A27	1.14088	NA	NA	NA	1
EME2	-1.09822	NA	NA	NA	1
PDZD3	-2.04141	NA	NA	NA	1
CPM	1.07475	NA	NA	NA	1
PRIMA1	-1.2802	NA	NA	NA	1
TGFA	1.04625	NA	NA	NA	1
THEG	2.63475	NA	NA	NA	1
COL12A1	1.01088	NA	NA	NA	1
LMCD1-AS1	1.12106	NA	NA	NA	1
RADIL	-1.17665	NA	NA	NA	1
SLC26A1	-1.10219	NA	NA	NA	1
CDH3	1.7539	NA	NA	NA	1
CHTF18	-1.03264	NA	NA	NA	1
MIR3176	-1.76507	NA	NA	NA	1
PRR15	-1.11818	NA	NA	NA	1
CDCP1	1.5453	NA	NA	NA	1
ASF1B	-1.05307	NA	NA	NA	1
E2F1	-1.02381	NA	NA	NA	1
RBM14	-1.02929	NA	NA	NA	1
MROH6	-1.01329	NA	NA	NA	1
CNIH3	1.79806	NA	NA	NA	1
ZMAT1	1.80431	NA	NA	NA	1
CUX2	1.74347	NA	NA	NA	1
PDF	-1.22024	NA	NA	NA	1
MYZAP	1.29253	NA	NA	NA	1
HMGA2	1.02855	NA	NA	NA	1
LAG3	-1.06611	NA	NA	NA	1
ESPNL	-1.3873	NA	NA	NA	1
SRRM2-AS1	-1.09226	NA	NA	NA	1
TPTE2P6	1.82894	NA	NA	NA	1
HNF1A-AS1	-1.20858	NA	NA	NA	1
AMPD3	1.07158	NA	NA	NA	1
HGFAC	-1.37371	NA	NA	NA	1
USP44	1.31054	NA	NA	NA	1
SDF2L1	-1.02487	NA	NA	NA	1
PRTN3	2.19934	NA	NA	NA	1
FGFR4	-1.43332	NA	NA	NA	1
DGCR9	-1.04609	NA	NA	NA	1
ACY3	-1.12801	NA	NA	NA	1
EFCAB12	-1.00016	NA	NA	NA	1
ZFAS1	1.1819	NA	NA	NA	1
LRRC32	1.22954	NA	NA	NA	1
ADAT3	-1.16509	NA	NA	NA	1
CKMT1A	-1.37328	NA	NA	NA	1
BDNF-AS	2.51048	NA	NA	NA	1
KCNK5	-1.0851	NA	NA	NA	1
TMEM178A	1.79443	NA	NA	NA	1
PTCH2	-1.07678	NA	NA	NA	1
GAS6-AS1	-1.11074	NA	NA	NA	1
SP9	-1.10249	NA	NA	NA	1
SDR16C5	1.69295	NA	NA	NA	1
RECQL4	-1.28215	NA	NA	NA	1
DMRTA2	-1.59658	NA	NA	NA	1
SCN4A	2.09532	NA	NA	NA	1
LOXL1-AS1	1.02175	NA	NA	NA	1
GAS5	1.42514	NA	NA	NA	1
HPDL	-1.21296	NA	NA	NA	1
DAW1	1.22644	NA	NA	NA	1
CSTA	1.89376	NA	NA	NA	1
PIWIL2	1.67217	NA	NA	NA	1
LAMC2	1.89479	NA	NA	NA	1
INSL4	-1.66163	NA	NA	NA	1
ADTRP	1.22067	NA	NA	NA	1
FYN	1.09627	NA	NA	NA	1
TREX2	-1.25121	NA	NA	NA	1
HOXB-AS3	-1.04558	NA	NA	NA	1
C9orf152	-1.47065	NA	NA	NA	1
CBLN2	-1.915	NA	NA	NA	1
CLDN16	2.03905	NA	NA	NA	1
PRR15L	-1.57431	NA	NA	NA	1
DSCAML1	-1.1432	NA	NA	NA	1
ITGA2	1.26305	NA	NA	NA	1
RNF125	1.21772	NA	NA	NA	1
SCARNA22	-1.1647	NA	NA	NA	1
TONSL	-1.15009	NA	NA	NA	1
HRK	2.18751	NA	NA	NA	1
CDH11	1.31993	NA	NA	NA	1
TM4SF5	-1.6375	NA	NA	NA	1
FAM222A	-1.09896	NA	NA	NA	1
HSPA1A	-1.0956	NA	NA	NA	1
SCG5	1.55565	NA	NA	NA	1
PRODH2	-1.85407	NA	NA	NA	1
FOXS1	-1.10093	NA	NA	NA	1
SYT9	1.26603	NA	NA	NA	1
SNORD35A	-1.12725	NA	NA	NA	1
SYT6	-1.04692	NA	NA	NA	1
NKX3-2	-1.08532	NA	NA	NA	1
SPINT1	1.18901	NA	NA	NA	1
ATP6AP1L	1.58657	NA	NA	NA	1
CPN1	-1.85154	NA	NA	NA	1
AQP3	-1.03008	NA	NA	NA	1
RIMS2	2.08681	NA	NA	NA	1
RSPH9	1.11353	NA	NA	NA	1
CD8A	1.08441	NA	NA	NA	1
GUCY2EP	1.17506	NA	NA	NA	1
KRT8	-1.1139	NA	NA	NA	1
PGM5P2	1.68582	NA	NA	NA	1
CCND3	-1.05606	NA	NA	NA	1
FEN1	-1.0636	NA	NA	NA	1
TM6SF1	3.27822	NA	NA	NA	1
PAPPA2	2.91	NA	NA	NA	1
GABRQ	-1.25502	NA	NA	NA	1
MRO	-2.50925	NA	NA	NA	1
WFIKKN1	-2.06214	NA	NA	NA	1
KCNQ3	1.4902	NA	NA	NA	1
LRRN4CL	-2.55512	NA	NA	NA	1
ZMYND12	1.06431	NA	NA	NA	1
PTGES3L	1.20949	NA	NA	NA	1
ISM2	1.42872	NA	NA	NA	1
RNF43	-1.07211	NA	NA	NA	1
MLNR	-1.33754	NA	NA	NA	1
PEG10	-1.12571	NA	NA	NA	1
SRD5A2	1.97766	NA	NA	NA	1
ZNF404	1.29773	NA	NA	NA	1
WTAPP1	2.55884	NA	NA	NA	1
ZNF525	1.32461	NA	NA	NA	1
PACSIN1	-1.65648	NA	NA	NA	1
EXPH5	1.46178	NA	NA	NA	1
CRISP3	2.4192	NA	NA	NA	1
SGCA	-1.39184	NA	NA	NA	1
TMEM154	1.48196	NA	NA	NA	1
PLAC1	1.38514	NA	NA	NA	1
RNF224	-1.07817	NA	NA	NA	1
KLHDC1	1.10027	NA	NA	NA	1
DACT3	-2.40874	NA	NA	NA	1
CBS	1.16612	NA	NA	NA	1
C19orf57	-1.1466	NA	NA	NA	1
MCM10	-1.00614	NA	NA	NA	1
COL6A4P1	1.09972	NA	NA	NA	1
MARCHF10	1.0564	NA	NA	NA	1
SPEF1	-1.45864	NA	NA	NA	1
ZBED2	-1.12968	NA	NA	NA	1
HCAR3	2.44725	NA	NA	NA	1
PDZRN4	-2.40396	NA	NA	NA	1
CD163L1	1.0127	NA	NA	NA	1
C6orf48	1.07102	NA	NA	NA	1
ZNF28	2.11378	NA	NA	NA	1
PRAP1	-2.35083	NA	NA	NA	1
MIOX	2.84394	NA	NA	NA	1
STK32A	1.0931	NA	NA	NA	1
PLIN4	-1.0269	NA	NA	NA	1
HIST2H2AC	-1.02819	NA	NA	NA	1
SLC9A9	1.03715	NA	NA	NA	1
FAAH2	1.29258	NA	NA	NA	1
LINC00242	-1.35431	NA	NA	NA	1
STC1	1.01753	NA	NA	NA	1
ACTL8	-1.18841	NA	NA	NA	1
RTEL1	-1.12904	NA	NA	NA	1
BAAT	-1.09814	NA	NA	NA	1
TPRG1	1.60671	NA	NA	NA	1
DIO2	-1.38403	NA	NA	NA	1
KCTD16	1.13474	NA	NA	NA	1
ORM1	2.51794	NA	NA	NA	1
PIPOX	2.01048	NA	NA	NA	1
EDN3	-1.54632	NA	NA	NA	1
PHOSPHO1	-1.13256	NA	NA	NA	1
LINC00592	1.07639	NA	NA	NA	1
CYP39A1	1.05547	NA	NA	NA	1
CAPN13	-2.25776	NA	NA	NA	1
NINJ2	-1.14586	NA	NA	NA	1
GAB3	1.21977	NA	NA	NA	1
ANK2	1.06165	NA	NA	NA	1
CTF1	1.4112	NA	NA	NA	1
TNFRSF13C	-1.16924	NA	NA	NA	1
PRDM8	1.40764	NA	NA	NA	1
ITGAL	-1.46917	NA	NA	NA	1
ST6GALNAC1	-1.9235	NA	NA	NA	1
ARID3C	-1.14979	NA	NA	NA	1
APOBR	-1.2769	NA	NA	NA	1
IL21R-AS1	-2.15802	NA	NA	NA	1
BNC1	1.80513	NA	NA	NA	1
MIR5587	-1.64172	NA	NA	NA	1
CLEC19A	-1.5868	NA	NA	NA	1
SLC16A8	-1.13046	NA	NA	NA	1
HCK	1.73014	NA	NA	NA	1
KY	1.51738	NA	NA	NA	1
SLC39A5	-1.73604	NA	NA	NA	1
PYY2	-1.11196	NA	NA	NA	1
ENHO	-1.12758	NA	NA	NA	1
ESRP1	1.59672	NA	NA	NA	1
IL36G	NA	NA	NA	2.1871	1
S100A8	NA	NA	NA	1.35389	1
PDZK1IP1	NA	NA	NA	1.78331	1
SPRR2A	NA	NA	NA	2.06246	1
CXCL5	NA	NA	NA	3.21044	1
PGLYRP4	NA	NA	NA	1.31788	1
SYNGR3	NA	NA	NA	1.98306	1
CXCL14	NA	NA	NA	-1.52943	1
FCGBP	NA	-1.0801	NA	NA	1
MMP9	NA	NA	NA	2.28829	1
CXCL6	NA	NA	NA	1.49342	1
SPRR2D	NA	NA	NA	2.34473	1
KRT24	NA	NA	NA	1.04226	1
S100A12	NA	NA	NA	1.19438	1
TNIP3	NA	NA	NA	2.02244	1
POU2AF1	NA	NA	NA	-1.33644	1
SPRR2F	NA	NA	NA	3.2428	1
VIPR1	NA	NA	NA	-1.01149	1
DAPL1	NA	NA	NA	-1.6498	1
SPINK7	NA	NA	NA	-2.94052	1
WNT7A	NA	NA	NA	1.22841	1
S100A7	NA	NA	NA	3.58146	1
TP73	NA	NA	NA	-1.36216	1
MAP2K6	NA	NA	NA	-1.34858	1
SEMA5A	NA	NA	NA	-1.22266	1
PDGFB	NA	NA	NA	1.75121	1
AQP5	NA	NA	NA	-1.21275	1
SEMA6D	NA	NA	NA	-1.12833	1
DMRT2	NA	NA	NA	-1.01496	1
VASH2	NA	NA	-1.04154	NA	1
GFPT2	NA	NA	3.14438	NA	1
L1CAM	NA	NA	NA	1.16783	1
AJAP1	NA	NA	NA	-1.53141	1
POU3F1	NA	NA	NA	-2.05143	1
MPPED2	NA	NA	NA	-1.81092	1
COMP	NA	NA	NA	-1.33072	1
HEY2	NA	NA	NA	-1.37374	1
TNNI2	NA	NA	NA	-1.52447	1
PTPRQ	NA	NA	NA	-2.53592	1
BEAN1	NA	NA	NA	1.75789	1
FOXN1	NA	NA	NA	-1.44013	1
IL2RB	NA	NA	NA	-1.51056	1
GSTA2	NA	NA	NA	-1.42556	1
SCN2B	NA	NA	NA	-1.13655	1
OPCML	NA	NA	NA	-1.21236	1
SLC26A4-AS1	NA	NA	NA	2.423	1
IL17REL	NA	NA	NA	2.62583	1
TFF1	NA	NA	NA	1.9979	1
TNNT3	NA	NA	NA	-1.15349	1
CD36	NA	NA	NA	-1.22233	1
KISS1	NA	NA	NA	2.63364	1
APCDD1	NA	NA	NA	-1.50117	1
KLK5	NA	NA	NA	1.16759	1
KCNJ16	NA	NA	NA	-1.80541	1
PTGFR	NA	NA	NA	-1.02414	1
MCHR1	NA	NA	NA	2.30709	1
IL19	NA	NA	NA	2.12789	1
SPRR2C	NA	NA	NA	2.0377	1
DSCAM	NA	NA	NA	1.66571	1
PRKCB	NA	NA	NA	-1.8029	1
CXCL13	NA	NA	NA	-1.34578	1
FAM13C	NA	NA	NA	-1.4478	1
PSAPL1	NA	NA	NA	-1.69444	1
FLG2	NA	NA	NA	-2.19207	1
IL12RB1	NA	NA	NA	2.2658	1
FOXP2	NA	NA	1.0874	NA	1
FAM216B	NA	NA	NA	-1.12765	1
OTOP3	NA	NA	NA	1.44338	1
NBPF11	NA	NA	NA	-1.9994	1
ROBO4	NA	NA	NA	1.71201	1
PIK3C2G	NA	NA	NA	-1.19487	1
ADAD2	NA	NA	NA	-1.25905	1
RPTN	NA	NA	NA	-1.18028	1
APOBEC2	NA	NA	NA	-1.30856	1
CEACAM7	NA	NA	NA	2.27601	1
CLDN8	NA	NA	NA	-1.19328	1
ANGPTL2	NA	NA	NA	-1.96189	1
EVPLL	NA	NA	NA	-1.09844	1
ADAMTS5	NA	NA	NA	-1.09306	1
GPR141	NA	NA	NA	2.06236	1
DDO	NA	NA	3.0042	NA	1
SOD3	NA	NA	NA	-1.07305	1
ZFP57	NA	NA	NA	1.10154	1
COL3A1	NA	NA	NA	-2.40546	1
KRT16P3	NA	NA	NA	-1.1104	1
BHLHE41	NA	5.43014	NA	NA	1
PCF11	NA	2.4696	NA	NA	1
HIST2H2BE	NA	3.78252	NA	NA	1
EPM2AIP1	NA	2.13291	NA	NA	1
PRR14	NA	2.28113	NA	NA	1
ANXA2	NA	-1.79942	NA	NA	1
HIST1H2AK	NA	4.45861	NA	NA	1
FBXW7	NA	2.02507	NA	NA	1
ZNF654	NA	2.217	NA	NA	1
TMBIM6	NA	-1.04196	NA	NA	1
WRAP53	NA	2.28949	NA	NA	1
PPM1D	NA	1.71124	NA	NA	1
CTDSP2	NA	2.08497	NA	NA	1
B3GALNT2	NA	1.87775	NA	NA	1
CAPZB	NA	-1.21492	NA	NA	1
RAP2B	NA	1.46933	NA	NA	1
MITD1	NA	1.62564	NA	NA	1
MIR5047	NA	1.91935	NA	NA	1
SLC12A7	NA	1.98366	NA	NA	1
PLEKHF2	NA	2.21765	NA	NA	1
PER3	NA	2.93026	NA	NA	1
ZNF830	NA	2.50585	NA	NA	1
MDM4	NA	2.21363	NA	NA	1
TPCN1	NA	-1.19702	NA	NA	1
PSAP	NA	-1.77501	NA	NA	1
ZBTB6	NA	2.34599	NA	NA	1
TET3	NA	2.40401	NA	NA	1
CCNT2	NA	1.89341	NA	NA	1
CLU	NA	-1.18762	NA	NA	1
ZNF764	NA	2.30812	NA	NA	1
CDKN1B	NA	2.14153	NA	NA	1
CCNT1	NA	1.98085	NA	NA	1
RASSF8	NA	2.13786	NA	NA	1
MFGE8	NA	-1.72562	NA	NA	1
BRPF1	NA	1.25395	NA	NA	1
SOCS5	NA	1.6263	NA	NA	1
ZNF77	NA	4.42994	NA	NA	1
C5orf51	NA	2.66117	NA	NA	1
LINC00472	NA	2.4551	NA	NA	1
IKZF5	NA	2.01114	NA	NA	1
BCAP31	NA	-1.32781	NA	NA	1
IER2	NA	2.89319	NA	NA	1
PRX	NA	2.10639	NA	NA	1
ZBTB34	NA	1.51002	NA	NA	1
ACTN4	NA	-1.25039	NA	NA	1
ZNF281	NA	1.52702	NA	NA	1
CD81	NA	-1.26406	NA	NA	1
DRD1	NA	2.59129	NA	NA	1
EAF1	NA	1.36341	NA	NA	1
LAMB1	NA	-1.13677	NA	NA	1
ALDH1B1	NA	-1.42621	NA	NA	1
NFKBIB	NA	1.68296	NA	NA	1
USPL1	NA	2.03786	NA	NA	1
DBP	NA	3.38148	NA	NA	1
CHD1	NA	1.17037	NA	NA	1
ZNF639	NA	1.85715	NA	NA	1
UBR5	NA	1.32452	NA	NA	1
ELL2	NA	1.60473	NA	NA	1
FOXA2	NA	1.40003	NA	NA	1
KLF5	NA	1.31422	NA	NA	1
TGM2	NA	1.84299	NA	NA	1
CEP85L	NA	2.2867	NA	NA	1
AEBP2	NA	2.13282	NA	NA	1
LINC00115	NA	3.52749	NA	NA	1
HCFC2	NA	2.04953	NA	NA	1
UTP15	NA	1.5745	NA	NA	1
NECAP1	NA	2.2206	NA	NA	1
ZNF211	NA	2.58231	NA	NA	1
MED13	NA	1.54311	NA	NA	1
ZNF79	NA	2.26622	NA	NA	1
LAMTOR3	NA	1.84536	NA	NA	1
SPRY1	NA	1.91896	NA	NA	1
RBM48	NA	2.02321	NA	NA	1
RFX7	NA	1.06109	NA	NA	1
RLIM	NA	1.65995	NA	NA	1
COPS6	NA	-1.27549	NA	NA	1
ABHD4	NA	-1.02272	NA	NA	1
S100A11	NA	-1.11265	NA	NA	1
UFM1	NA	1.70036	NA	NA	1
CRKL	NA	1.44617	NA	NA	1
PRKXP1	NA	4.19185	NA	NA	1
ECH1	NA	-1.46355	NA	NA	1
HSPG2	NA	-1.48134	NA	NA	1
TGS1	NA	1.38664	NA	NA	1
MYSM1	NA	2.0656	NA	NA	1
ANXA1	NA	-1.44447	NA	NA	1
IRGQ	NA	1.26569	NA	NA	1
ACAA2	NA	-1.32556	NA	NA	1
PHIP	NA	1.06432	NA	NA	1
IGFBP6	NA	-1.53047	NA	NA	1
ZNF567	NA	1.89449	NA	NA	1
ZBTB11	NA	1.26679	NA	NA	1
HES1	NA	2.57884	NA	NA	1
ARID2	NA	1.20991	NA	NA	1
MSL2	NA	1.57013	NA	NA	1
ZBTB1	NA	1.37601	NA	NA	1
PLOD1	NA	-1.24222	NA	NA	1
BANF1	NA	-1.07521	NA	NA	1
CNOT6	NA	1.03924	NA	NA	1
EID2B	NA	1.62093	NA	NA	1
FAM126B	NA	1.84157	NA	NA	1
THAP2	NA	1.9123	NA	NA	1
EXOC8	NA	1.45476	NA	NA	1
FNIP1	NA	1.62618	NA	NA	1
PURB	NA	1.42098	NA	NA	1
EDA2R	NA	1.14572	NA	NA	1
THUMPD1	NA	1.20005	NA	NA	1
EFNB1	NA	1.65043	NA	NA	1
ATP6V0E1	NA	-1.12372	NA	NA	1
ZRANB2	NA	1.18973	NA	NA	1
MBOAT7	NA	-1.21476	NA	NA	1
KANSL1	NA	1.61739	NA	NA	1
GRPEL2	NA	1.29767	NA	NA	1
NFIL3	NA	3.37397	NA	NA	1
P4HA2	NA	-1.10784	NA	NA	1
CHD9	NA	1.079	NA	NA	1
SLC30A1	NA	1.41846	NA	NA	1
USP36	NA	1.22709	NA	NA	1
DMTF1	NA	1.44075	NA	NA	1
FOXC2	NA	5.09409	NA	NA	1
STRN3	NA	1.39024	NA	NA	1
MPDU1	NA	-1.23838	NA	NA	1
AP2M1	NA	-1.48869	NA	NA	1
ZSWIM6	NA	1.28783	NA	NA	1
TOPORS	NA	1.26654	NA	NA	1
POU2F1	NA	1.64191	NA	NA	1
ZNF121	NA	2.82406	NA	NA	1
TIGD1	NA	1.17786	NA	NA	1
LGALS1	NA	-1.22335	NA	NA	1
SNHG10	NA	2.6761	NA	NA	1
PPP1R18	NA	1.32191	NA	NA	1
ZNF518B	NA	1.46768	NA	NA	1
VCPIP1	NA	1.00954	NA	NA	1
PTP4A1	NA	1.4319	NA	NA	1
JUP	NA	-1.15875	NA	NA	1
SIM2	NA	1.57672	NA	NA	1
S100A10	NA	-1.04741	NA	NA	1
C3orf38	NA	1.87368	NA	NA	1
MIS12	NA	1.12955	NA	NA	1
PAXBP1	NA	1.26091	NA	NA	1
ZNF24	NA	1.50025	NA	NA	1
ITGA6	NA	-1.07626	NA	NA	1
GHITM	NA	-1.14636	NA	NA	1
TTC32	NA	1.49128	NA	NA	1
SP3	NA	1.03522	NA	NA	1
RBPJ	NA	2.42431	NA	NA	1
TMEM59	NA	-1.12498	NA	NA	1
OAZ1	NA	-1.0494	NA	NA	1
ZNF555	NA	3.25456	NA	NA	1
ZNF451	NA	1.31269	NA	NA	1
YY1AP1	NA	1.38536	NA	NA	1
ABHD12	NA	-1.01719	NA	NA	1
PNRC2	NA	1.6777	NA	NA	1
KIAA2026	NA	1.41848	NA	NA	1
FAM8A1	NA	1.39393	NA	NA	1
INO80	NA	1.31626	NA	NA	1
CD200R1	NA	4.25778	NA	NA	1
MYH9	NA	-1.17094	NA	NA	1
CA2	NA	1.57065	NA	NA	1
TRMT10C	NA	1.36984	NA	NA	1
PRPF39	NA	1.6278	NA	NA	1
ZNF557	NA	1.77336	NA	NA	1
ING3	NA	1.77275	NA	NA	1
NGDN	NA	1.46378	NA	NA	1
PRPF38A	NA	1.21306	NA	NA	1
HNRNPH3	NA	1.32197	NA	NA	1
FEM1C	NA	1.60661	NA	NA	1
ACO2	NA	-1.21461	NA	NA	1
SFN	NA	-1.05517	NA	NA	1
KIF20B	NA	1.42156	NA	NA	1
MIER3	NA	1.57445	NA	NA	1
SPRY4	NA	1.38334	NA	NA	1
ALCAM	NA	-1.22273	NA	NA	1
AEN	NA	1.72676	NA	NA	1
ABHD2	NA	-1.0625	NA	NA	1
ZNF614	NA	1.78061	NA	NA	1
RNF6	NA	1.66092	NA	NA	1
PIGS	NA	-1.00487	NA	NA	1
RBM12B	NA	1.18759	NA	NA	1
PLEKHG2	NA	2.15235	NA	NA	1
SMARCA2	NA	-1.3376	NA	NA	1
ZFX	NA	1.00179	NA	NA	1
USP37	NA	2.40475	NA	NA	1
ZNF8	NA	1.80656	NA	NA	1
C6orf62	NA	1.06536	NA	NA	1
CEP95	NA	1.2638	NA	NA	1
TUBA1B	NA	-1.29211	NA	NA	1
ACBD3	NA	1.13567	NA	NA	1
CDH17	NA	-1.89131	NA	NA	1
VEZF1	NA	1.59276	NA	NA	1
ZBTB5	NA	1.56076	NA	NA	1
NTNG2	NA	4.07769	NA	NA	1
GRHL1	NA	3.92014	NA	NA	1
SYNGR2	NA	-1.02685	NA	NA	1
AOC3	NA	2.39491	NA	NA	1
THUMPD2	NA	1.67262	NA	NA	1
GANAB	NA	-1.04741	NA	NA	1
MDH2	NA	-1.09614	NA	NA	1
DARS2	NA	-1.34867	NA	NA	1
NXT2	NA	1.73684	NA	NA	1
OCIAD2	NA	-1.00696	NA	NA	1
COL18A1	NA	-1.2358	NA	NA	1
ADNP2	NA	1.62161	NA	NA	1
FLNA	NA	-1.06968	NA	NA	1
ESF1	NA	1.63094	NA	NA	1
FRAS1	NA	-1.0701	NA	NA	1
APLP2	NA	-1.51998	NA	NA	1
SIN3A	NA	1.17763	NA	NA	1
SRSF1	NA	1.08523	NA	NA	1
BRAF	NA	1.59642	NA	NA	1
ADM5	NA	2.84819	NA	NA	1
THAP9-AS1	NA	1.83321	NA	NA	1
THAP1	NA	2.08541	NA	NA	1
SRSF6	NA	1.02182	NA	NA	1
HBP1	NA	2.05461	NA	NA	1
AKIRIN1	NA	1.10465	NA	NA	1
TSPYL4	NA	1.5179	NA	NA	1
MDH1	NA	-1.24927	NA	NA	1
EPHX1	NA	-2.44245	NA	NA	1
DIDO1	NA	1.42566	NA	NA	1
ZNF845	NA	1.95899	NA	NA	1
SDE2	NA	1.42377	NA	NA	1
CCDC71L	NA	1.40065	NA	NA	1
FBRS	NA	1.15461	NA	NA	1
ZNF776	NA	1.68359	NA	NA	1
SIRT1	NA	1.00136	NA	NA	1
EEF1A1	NA	-1.32954	NA	NA	1
TYW5	NA	1.49793	NA	NA	1
ZNF280B	NA	2.54173	NA	NA	1
MYNN	NA	1.70425	NA	NA	1
RAB2B	NA	1.68136	NA	NA	1
ZNF184	NA	2.45259	NA	NA	1
PNN	NA	1.97921	NA	NA	1
PHKB	NA	-1.00275	NA	NA	1
SCAF4	NA	1.3766	NA	NA	1
MCFD2	NA	-1.09293	NA	NA	1
LEMD3	NA	1.03863	NA	NA	1
GPBP1L1	NA	1.37154	NA	NA	1
H1FX	NA	1.5545	NA	NA	1
CELF1	NA	1.7212	NA	NA	1
ZNF337	NA	1.27412	NA	NA	1
USP42	NA	1.62843	NA	NA	1
RPA1	NA	-1.37286	NA	NA	1
BRD4	NA	1.24789	NA	NA	1
PIGW	NA	1.09426	NA	NA	1
CAPNS1	NA	-1.1147	NA	NA	1
SND1	NA	-1.1401	NA	NA	1
ZNF430	NA	2.06679	NA	NA	1
RCHY1	NA	1.53999	NA	NA	1
RPN2	NA	-1.04158	NA	NA	1
JUND	NA	1.26059	NA	NA	1
PYGB	NA	-1.11619	NA	NA	1
KIAA1586	NA	1.6662	NA	NA	1
RSU1	NA	-1.19886	NA	NA	1
YAF2	NA	1.76163	NA	NA	1
ANXA2P2	NA	-1.65653	NA	NA	1
PRSS23	NA	-1.21129	NA	NA	1
ANXA11	NA	-1.06067	NA	NA	1
DPP3	NA	-1.3178	NA	NA	1
PIGA	NA	2.76566	NA	NA	1
TBK1	NA	1.4261	NA	NA	1
ZNF721	NA	1.46815	NA	NA	1
PSMB6	NA	-1.03513	NA	NA	1
ZNF461	NA	1.55004	NA	NA	1
CHST2	NA	2.37016	NA	NA	1
CHIC2	NA	2.21008	NA	NA	1
AKR1B1	NA	-1.43537	NA	NA	1
LPAR6	NA	2.01899	NA	NA	1
ARGLU1	NA	1.08205	NA	NA	1
MCL1	NA	1.43185	NA	NA	1
GPX3	NA	-1.67133	NA	NA	1
RNF169	NA	1.28723	NA	NA	1
SMNDC1	NA	1.78228	NA	NA	1
SNRNP27	NA	1.17692	NA	NA	1
CPA4	NA	-2.40704	NA	NA	1
RIF1	NA	1.04764	NA	NA	1
COL2A1	NA	5.5514	NA	NA	1
USP15	NA	1.26989	NA	NA	1
ARMCX3	NA	1.31804	NA	NA	1
RAPGEF6	NA	1.08984	NA	NA	1
KLHL4	NA	-1.994	NA	NA	1
ZNF711	NA	1.71417	NA	NA	1
HIST1H2AI	NA	2.52467	NA	NA	1
GORAB	NA	1.27167	NA	NA	1
PPIL4	NA	1.43006	NA	NA	1
MBIP	NA	1.95375	NA	NA	1
HSF2	NA	1.59427	NA	NA	1
LACC1	NA	1.093	NA	NA	1
ZNF57	NA	4.51384	NA	NA	1
PFN1	NA	-1.06226	NA	NA	1
APAF1	NA	1.05331	NA	NA	1
ZCCHC10	NA	1.61466	NA	NA	1
TRNP1	NA	-1.09584	NA	NA	1
SERTAD3	NA	1.81072	NA	NA	1
SUZ12	NA	1.14081	NA	NA	1
G6PC3	NA	-1.25509	NA	NA	1
ARMCX5	NA	1.65455	NA	NA	1
SETD2	NA	1.07271	NA	NA	1
PPME1	NA	-1.08965	NA	NA	1
SNHG1	NA	1.65706	NA	NA	1
GPATCH8	NA	1.48098	NA	NA	1
NDUFB8	NA	-1.48269	NA	NA	1
SORL1	NA	-1.71119	NA	NA	1
DUSP6	NA	1.33554	NA	NA	1
MAFK	NA	1.23301	NA	NA	1
UBL5	NA	-1.19202	NA	NA	1
SERPINH1	NA	-1.74893	NA	NA	1
GPD1L	NA	-1.37343	NA	NA	1
TGIF2	NA	1.56526	NA	NA	1
ANKRD49	NA	1.98296	NA	NA	1
ZFC3H1	NA	1.40584	NA	NA	1
SMC4	NA	1.18119	NA	NA	1
ALG8	NA	-1.00445	NA	NA	1
PRR13	NA	-1.04832	NA	NA	1
DDX20	NA	1.08406	NA	NA	1
ADAM9	NA	-1.12882	NA	NA	1
ARHGAP30	NA	2.30755	NA	NA	1
ENO1	NA	-1.00237	NA	NA	1
ZNF131	NA	1.22382	NA	NA	1
SENP7	NA	1.71891	NA	NA	1
PBX2	NA	1.01905	NA	NA	1
MIR3685	NA	3.73376	NA	NA	1
SNORA48	NA	3.76302	NA	NA	1
DCAF4L1	NA	3.92786	NA	NA	1
FGFR1OP2	NA	1.36822	NA	NA	1
GPR3	NA	2.49067	NA	NA	1
PGK1	NA	-1.17514	NA	NA	1
ZNF432	NA	2.33663	NA	NA	1
HOXA3	NA	1.24896	NA	NA	1
ZNF34	NA	1.92824	NA	NA	1
FRMD4B	NA	1.68855	NA	NA	1
DCUN1D3	NA	1.67867	NA	NA	1
PGAP1	NA	1.09114	NA	NA	1
GPC1	NA	-1.63656	NA	NA	1
TAF3	NA	1.20112	NA	NA	1
CREB1	NA	1.09254	NA	NA	1
MARCKS	NA	1.81937	NA	NA	1
MED26	NA	2.28638	NA	NA	1
HIST3H2A	NA	2.30968	NA	NA	1
NOC3L	NA	1.34702	NA	NA	1
WTAP	NA	2.03797	NA	NA	1
WDR26	NA	1.42562	NA	NA	1
MATN2	NA	-1.57136	NA	NA	1
USP5	NA	-1.11355	NA	NA	1
CD44	NA	-1.10197	NA	NA	1
DPYSL5	NA	-2.03416	NA	NA	1
IFNA22P	NA	3.42412	NA	NA	1
GLG1	NA	-1.2537	NA	NA	1
CEACAM6	NA	-1.02287	NA	NA	1
VDR	NA	2.069	NA	NA	1
CDK5R1	NA	2.02582	NA	NA	1
ZNF12	NA	2.24384	NA	NA	1
GPATCH2	NA	1.19424	NA	NA	1
ZKSCAN8	NA	1.65202	NA	NA	1
CEBPB	NA	1.88032	NA	NA	1
TMED9	NA	-1.08445	NA	NA	1
LRIF1	NA	1.14611	NA	NA	1
TECR	NA	-1.41058	NA	NA	1
EYA3	NA	1.25959	NA	NA	1
UAP1L1	NA	1.69201	NA	NA	1
NXT1	NA	1.37174	NA	NA	1
ZC3H11A	NA	1.30052	NA	NA	1
AP1M2	NA	-1.533	NA	NA	1
WDR89	NA	1.36923	NA	NA	1
MED9	NA	1.531	NA	NA	1
PPP1R10	NA	2.09133	NA	NA	1
ZNF641	NA	1.57341	NA	NA	1
FAM84B	NA	1.35152	NA	NA	1
NIPBL	NA	1.28743	NA	NA	1
RAB24	NA	1.40628	NA	NA	1
ZCCHC3	NA	1.35478	NA	NA	1
NME1	NA	-1.25748	NA	NA	1
ZNF615	NA	1.98337	NA	NA	1
C3orf35	NA	3.1785	NA	NA	1
NBPF10	NA	1.89986	NA	NA	1
RASA2	NA	1.45783	NA	NA	1
UQCRQ	NA	-1.1095	NA	NA	1
UTP3	NA	1.14867	NA	NA	1
GSN	NA	-1.01688	NA	NA	1
ZNRD1	NA	1.73141	NA	NA	1
ARL14EP	NA	1.00715	NA	NA	1
STK32B	NA	-1.46007	NA	NA	1
ZBTB33	NA	1.22786	NA	NA	1
SCAF8	NA	1.21095	NA	NA	1
GOLGA6C	NA	4.37077	NA	NA	1
SOCS4	NA	1.19211	NA	NA	1
MAPK9	NA	-1.01119	NA	NA	1
ZNF134	NA	1.28477	NA	NA	1
AHCY	NA	-1.60228	NA	NA	1
ZNF770	NA	1.11031	NA	NA	1
MEX3C	NA	1.68599	NA	NA	1
TPI1	NA	-1.33238	NA	NA	1
LIN28B	NA	1.04194	NA	NA	1
SNORD50B	NA	3.1521	NA	NA	1
NIPAL3	NA	-1.51001	NA	NA	1
ZNF7	NA	1.29653	NA	NA	1
PCCB	NA	-1.22465	NA	NA	1
NPHS1	NA	2.28436	NA	NA	1
WDR43	NA	1.13452	NA	NA	1
SCARNA15	NA	3.00002	NA	NA	1
TRAPPC13	NA	1.0519	NA	NA	1
ZFP37	NA	1.89898	NA	NA	1
PPP1R7	NA	-1.011	NA	NA	1
SNAP25	NA	1.9461	NA	NA	1
MYRF	NA	-1.01755	NA	NA	1
IGFBP7	NA	-1.83504	NA	NA	1
FUCA2	NA	-1.10067	NA	NA	1
KLHDC3	NA	-1.02704	NA	NA	1
RNF11	NA	1.07261	NA	NA	1
VAMP2	NA	2.01868	NA	NA	1
FAM193A	NA	1.07176	NA	NA	1
MAPRE2	NA	-1.74003	NA	NA	1
ECI2	NA	-1.14128	NA	NA	1
ZNF799	NA	2.24901	NA	NA	1
TNFAIP8	NA	1.89778	NA	NA	1
LRPAP1	NA	-1.22879	NA	NA	1
UBE2W	NA	1.05668	NA	NA	1
PRKCSH	NA	-1.12676	NA	NA	1
TEF	NA	1.42614	NA	NA	1
SMURF2	NA	1.04449	NA	NA	1
RBM15	NA	1.56543	NA	NA	1
UBE2B	NA	1.26942	NA	NA	1
RASSF9	NA	1.34694	NA	NA	1
USP21	NA	1.29852	NA	NA	1
PRPF38B	NA	1.43083	NA	NA	1
HOXB3	NA	1.25328	NA	NA	1
SENP1	NA	1.15256	NA	NA	1
GGCX	NA	-1.00005	NA	NA	1
HMGN2	NA	1.37834	NA	NA	1
IL4R	NA	1.18252	NA	NA	1
E2F3	NA	1.01745	NA	NA	1
YBX1	NA	-1.02864	NA	NA	1
MSMO1	NA	-1.01355	NA	NA	1
ZSCAN12P1	NA	3.24699	NA	NA	1
ATP6AP1	NA	-1.21782	NA	NA	1
LMAN2L	NA	-1.19927	NA	NA	1
FLCN	NA	1.7791	NA	NA	1
EED	NA	1.33957	NA	NA	1
GPRIN3	NA	1.09532	NA	NA	1
HYMAI	NA	4.10162	NA	NA	1
AARS	NA	-1.09933	NA	NA	1
PHC3	NA	1.26948	NA	NA	1
KAT6A	NA	1.49659	NA	NA	1
LYSMD3	NA	1.47968	NA	NA	1
PRKACA	NA	-1.18196	NA	NA	1
RBM39	NA	1.54314	NA	NA	1
PLCL2	NA	1.07749	NA	NA	1
LINC00641	NA	2.4544	NA	NA	1
KCTD11	NA	1.29654	NA	NA	1
G6PD	NA	-2.14515	NA	NA	1
UQCR10	NA	-1.19411	NA	NA	1
C1orf52	NA	1.32523	NA	NA	1
FKBP1A	NA	-1.21882	NA	NA	1
COL5A2	NA	-1.07478	NA	NA	1
EFNA3	NA	2.63441	NA	NA	1
AMZ2P1	NA	1.16172	NA	NA	1
TUBA4A	NA	-1.07267	NA	NA	1
CASP10	NA	1.50322	NA	NA	1
SENP6	NA	1.05983	NA	NA	1
OLFML2A	NA	-2.33315	NA	NA	1
NDUFA4	NA	-1.26482	NA	NA	1
CEBPD	NA	1.36573	NA	NA	1
EVPL	NA	1.43877	NA	NA	1
NDUFS8	NA	-1.06298	NA	NA	1
NOL8	NA	1.05775	NA	NA	1
PPP1R3E	NA	1.28072	NA	NA	1
ICOSLG	NA	1.45161	NA	NA	1
TMEM14B	NA	-1.2925	NA	NA	1
NBEAP1	NA	3.35535	NA	NA	1
ATP8B1	NA	-1.04571	NA	NA	1
CPE	NA	-1.44436	NA	NA	1
NEDD8	NA	-1.00119	NA	NA	1
EIF6	NA	-1.13536	NA	NA	1
SLC30A7	NA	1.14913	NA	NA	1
CAP2	NA	-1.13659	NA	NA	1
PET100	NA	-1.17047	NA	NA	1
FBN1	NA	-1.28172	NA	NA	1
REPIN1	NA	1.12505	NA	NA	1
KRT19	NA	-1.59358	NA	NA	1
ELMSAN1	NA	1.23233	NA	NA	1
CAPG	NA	-1.12148	NA	NA	1
AKAP17A	NA	1.14584	NA	NA	1
PLS3	NA	-1.23107	NA	NA	1
GSR	NA	-1.11759	NA	NA	1
PAN3	NA	1.06306	NA	NA	1
KANSL2	NA	1.05612	NA	NA	1
CCR6	NA	3.65933	NA	NA	1
EML1	NA	-1.19653	NA	NA	1
AGBL3	NA	1.97918	NA	NA	1
TRIM4	NA	1.23594	NA	NA	1
MAP1LC3B	NA	1.4805	NA	NA	1
CSGALNACT2	NA	1.31056	NA	NA	1
ZNF335	NA	1.30811	NA	NA	1
SRSF3	NA	1.16826	NA	NA	1
ETFB	NA	-1.58245	NA	NA	1
PPP1CA	NA	-1.13455	NA	NA	1
IRF2BPL	NA	1.20519	NA	NA	1
PLEKHA3	NA	1.17495	NA	NA	1
ADH5	NA	-1.22614	NA	NA	1
ARID3B	NA	2.13954	NA	NA	1
EIF4ENIF1	NA	1.02794	NA	NA	1
ITM2C	NA	-1.12607	NA	NA	1
LIN7C	NA	1.03477	NA	NA	1
QPCT	NA	-1.1543	NA	NA	1
AGR2	NA	-1.89752	NA	NA	1
GNS	NA	-1.05988	NA	NA	1
ADAM20P1	NA	3.16547	NA	NA	1
RBBP6	NA	2.11336	NA	NA	1
PSMB5	NA	-1.42659	NA	NA	1
MED1	NA	1.41745	NA	NA	1
PRKAR1B	NA	-1.09385	NA	NA	1
MKRN3	NA	1.83747	NA	NA	1
FOXD1	NA	1.44551	NA	NA	1
ASNA1	NA	-1.00216	NA	NA	1
CRTC2	NA	1.698	NA	NA	1
CYBA	NA	-1.65195	NA	NA	1
RSF1	NA	1.56298	NA	NA	1
ANXA6	NA	-1.33924	NA	NA	1
ACAN	NA	5.0402	NA	NA	1
MTMR4	NA	1.06643	NA	NA	1
PLD3	NA	-1.14169	NA	NA	1
FZD5	NA	1.05001	NA	NA	1
SNRPA	NA	1.04283	NA	NA	1
ING1	NA	1.63975	NA	NA	1
ADCY9	NA	-1.15094	NA	NA	1
ZNF202	NA	1.12396	NA	NA	1
TCTN1	NA	-1.35184	NA	NA	1
PDE9A	NA	1.82192	NA	NA	1
DSG2	NA	-1.25024	NA	NA	1
ZNF510	NA	1.34203	NA	NA	1
PAN3-AS1	NA	2.04832	NA	NA	1
TBX2	NA	1.87854	NA	NA	1
COX6A1	NA	-1.21176	NA	NA	1
TGFBR2	NA	-1.25398	NA	NA	1
NAA15	NA	1.07616	NA	NA	1
FSCN1	NA	-1.31242	NA	NA	1
LDHB	NA	-1.2539	NA	NA	1
TXNRD1	NA	-1.01183	NA	NA	1
RIOK3	NA	1.33144	NA	NA	1
VCAN	NA	-1.08751	NA	NA	1
RRAGB	NA	1.2897	NA	NA	1
MAGOHB	NA	1.01213	NA	NA	1
MRPL24	NA	-1.20403	NA	NA	1
CAV1	NA	-1.04233	NA	NA	1
SON	NA	1.18333	NA	NA	1
SETD5	NA	1.18731	NA	NA	1
YWHAQ	NA	-1.0207	NA	NA	1
BTG1	NA	1.97573	NA	NA	1
PEBP1	NA	-1.23787	NA	NA	1
FBXO5	NA	1.4156	NA	NA	1
DAZAP2	NA	1.06539	NA	NA	1
TAF7	NA	1.06754	NA	NA	1
NRBF2	NA	1.2664	NA	NA	1
FOXJ3	NA	1.29785	NA	NA	1
SCUBE2	NA	3.20323	NA	NA	1
C12orf4	NA	1.46376	NA	NA	1
CWC25	NA	1.34196	NA	NA	1
RNASEK	NA	2.85602	NA	NA	1
SNORA67	NA	1.97489	NA	NA	1
ANK1	NA	-1.66449	NA	NA	1
SLCO2B1	NA	-2.01883	NA	NA	1
SNORA31	NA	3.80804	NA	NA	1
MED23	NA	1.08241	NA	NA	1
SREK1IP1	NA	1.49468	NA	NA	1
CRY1	NA	1.60928	NA	NA	1
RNF219	NA	1.30813	NA	NA	1
MIR3064	NA	1.81688	NA	NA	1
SLC39A11	NA	-1.24201	NA	NA	1
RPS26	NA	-1.20965	NA	NA	1
SUZ12P1	NA	1.75543	NA	NA	1
ADIRF	NA	4.16368	NA	NA	1
BSG	NA	-1.34257	NA	NA	1
CES1	NA	-1.98875	NA	NA	1
GSTP1	NA	-1.27311	NA	NA	1
SORT1	NA	-1.41775	NA	NA	1
FGL1	NA	-1.0726	NA	NA	1
FOXP1	NA	1.4699	NA	NA	1
SETX	NA	1.2749	NA	NA	1
DIRAS1	NA	2.21509	NA	NA	1
MRPL27	NA	-1.05519	NA	NA	1
RPL18	NA	-1.16469	NA	NA	1
SNORA25	NA	2.99587	NA	NA	1
ERMP1	NA	-1.07572	NA	NA	1
PROM1	NA	3.77615	NA	NA	1
RANBP10	NA	1.0326	NA	NA	1
ZNF558	NA	1.17222	NA	NA	1
TAF1A	NA	1.47497	NA	NA	1
ATP1A1	NA	-1.07811	NA	NA	1
SPATA2	NA	1.1155	NA	NA	1
BCLAF1	NA	1.23756	NA	NA	1
RSBN1	NA	2.02666	NA	NA	1
ZNF574	NA	1.04337	NA	NA	1
COIL	NA	1.20223	NA	NA	1
UPF3B	NA	1.01273	NA	NA	1
INTS12	NA	1.065	NA	NA	1
TAB3	NA	1.36102	NA	NA	1
DNAJC12	NA	1.08231	NA	NA	1
TTC33	NA	1.13599	NA	NA	1
CUEDC2	NA	-1.22007	NA	NA	1
AIFM1	NA	-1.01701	NA	NA	1
UCHL1	NA	-1.00197	NA	NA	1
RB1CC1	NA	1.37439	NA	NA	1
ZEB1-AS1	NA	1.9734	NA	NA	1
FAM76B	NA	1.51409	NA	NA	1
HIST1H4I	NA	3.0474	NA	NA	1
DDX3Y	NA	1.2885	NA	NA	1
TRAF6	NA	1.02063	NA	NA	1
COX6B1	NA	-1.01862	NA	NA	1
DIP2C	NA	1.3512	NA	NA	1
AMER1	NA	1.22447	NA	NA	1
NXN	NA	-1.06704	NA	NA	1
AOC2	NA	1.67592	NA	NA	1
PHF1	NA	1.21015	NA	NA	1
SNAPC1	NA	1.02859	NA	NA	1
HMOX2	NA	-1.10216	NA	NA	1
TIMP2	NA	-1.61553	NA	NA	1
SNORA28	NA	4.9776	NA	NA	1
TPGS2	NA	-1.03244	NA	NA	1
BTN2A1	NA	1.45704	NA	NA	1
ZNF669	NA	1.64687	NA	NA	1
ZNF579	NA	1.33258	NA	NA	1
RBM18	NA	1.05937	NA	NA	1
PARVB	NA	-1.23545	NA	NA	1
POM121C	NA	1.28402	NA	NA	1
LIN37	NA	1.32999	NA	NA	1
GLDC	NA	-1.21989	NA	NA	1
MSL1	NA	1.19427	NA	NA	1
CCNG2	NA	1.71311	NA	NA	1
SALL1	NA	2.09934	NA	NA	1
BUD13	NA	1.37864	NA	NA	1
TIFA	NA	1.30429	NA	NA	1
COA3	NA	-1.40446	NA	NA	1
SPRED1	NA	1.06083	NA	NA	1
ZNF765	NA	1.06136	NA	NA	1
ANKRD50	NA	1.02002	NA	NA	1
ANAPC5	NA	-1.16049	NA	NA	1
LDOC1	NA	-1.13727	NA	NA	1
LMAN2	NA	-1.22289	NA	NA	1
ZNF155	NA	1.5741	NA	NA	1
DAG1	NA	-1.0836	NA	NA	1
ADAM15	NA	-1.06133	NA	NA	1
OTUD3	NA	1.90713	NA	NA	1
CCDC144A	NA	1.66121	NA	NA	1
APMAP	NA	-1.29195	NA	NA	1
SRSF5	NA	1.06438	NA	NA	1
SOCS6	NA	1.18856	NA	NA	1
ARHGAP40	NA	5.64633	NA	NA	1
RNPC3	NA	1.3907	NA	NA	1
FBXL18	NA	-1.01703	NA	NA	1
SNORA8	NA	1.91717	NA	NA	1
BBS12	NA	1.22689	NA	NA	1
SOWAHC	NA	1.00722	NA	NA	1
ZNF407	NA	1.08562	NA	NA	1
ITSN2	NA	1.18031	NA	NA	1
ARRDC2	NA	1.14253	NA	NA	1
TTC21B	NA	1.06391	NA	NA	1
BCL7A	NA	1.34696	NA	NA	1
ERF	NA	1.07194	NA	NA	1
TJAP1	NA	1.26855	NA	NA	1
IFNGR2	NA	1.03661	NA	NA	1
CD82	NA	-1.47578	NA	NA	1
ZNF720	NA	1.18231	NA	NA	1
ZHX2	NA	1.3282	NA	NA	1
PRDX3	NA	-1.35511	NA	NA	1
CTDSPL2	NA	1.54311	NA	NA	1
REV1	NA	1.04758	NA	NA	1
ZMPSTE24	NA	-1.01074	NA	NA	1
METTL18	NA	1.34727	NA	NA	1
PDRG1	NA	1.0663	NA	NA	1
USP12	NA	1.23093	NA	NA	1
PCGF1	NA	1.16211	NA	NA	1
CCDC66	NA	1.32886	NA	NA	1
CDKL3	NA	2.12628	NA	NA	1
COL6A1	NA	-1.44299	NA	NA	1
BRD2	NA	1.0203	NA	NA	1
ACVR2A	NA	1.05954	NA	NA	1
SMARCA4	NA	1.39629	NA	NA	1
RNASEH2A	NA	-1.65135	NA	NA	1
IFRD1	NA	1.29388	NA	NA	1
MARCHF7	NA	1.19103	NA	NA	1
IPPK	NA	1.10131	NA	NA	1
CCDC81	NA	2.8522	NA	NA	1
AKR1A1	NA	-1.16769	NA	NA	1
ALDH4A1	NA	-1.31128	NA	NA	1
PHPT1	NA	-1.01253	NA	NA	1
PPP4R2	NA	1.59862	NA	NA	1
TAF13	NA	1.19598	NA	NA	1
CCDC59	NA	1.26049	NA	NA	1
ELL	NA	1.68722	NA	NA	1
NDUFA13	NA	-1.56494	NA	NA	1
ANAPC11	NA	-1.36108	NA	NA	1
RPS9	NA	-1.09805	NA	NA	1
ZIC5	NA	1.43594	NA	NA	1
TSPO	NA	-1.08207	NA	NA	1
CDK8	NA	1.22068	NA	NA	1
CIR1	NA	1.20339	NA	NA	1
ZNF16	NA	1.27072	NA	NA	1
SLC17A8	NA	4.07944	NA	NA	1
ITGA9	NA	3.28783	NA	NA	1
CLASRP	NA	1.29358	NA	NA	1
WDR4	NA	-1.00402	NA	NA	1
PLS1	NA	-1.05743	NA	NA	1
PRDX1	NA	-1.46982	NA	NA	1
PSMB3	NA	-1.38328	NA	NA	1
ZNF473	NA	1.21877	NA	NA	1
PLEKHM2	NA	1.04592	NA	NA	1
ZBTB2	NA	1.35065	NA	NA	1
TBC1D15	NA	1.54055	NA	NA	1
ODC1	NA	1.46482	NA	NA	1
EPB41L4A-AS1	NA	1.3732	NA	NA	1
GBA	NA	-1.12042	NA	NA	1
KANK2	NA	-1.09534	NA	NA	1
GPR142	NA	5.96024	NA	NA	1
DDOST	NA	-1.09766	NA	NA	1
MED30	NA	1.84422	NA	NA	1
STK19	NA	1.23164	NA	NA	1
ZNF23	NA	1.54551	NA	NA	1
PPARGC1A	NA	1.19718	NA	NA	1
IPMK	NA	1.03354	NA	NA	1
CHIC1	NA	1.1157	NA	NA	1
SAMM50	NA	-1.08095	NA	NA	1
TBC1D12	NA	1.26491	NA	NA	1
PTBP2	NA	1.44502	NA	NA	1
UBXN7	NA	1.53929	NA	NA	1
COG4	NA	-1.05045	NA	NA	1
ZMYM5	NA	1.29589	NA	NA	1
PIGR	NA	4.05994	NA	NA	1
FAM206A	NA	1.03671	NA	NA	1
YTHDC1	NA	1.27026	NA	NA	1
ZNF264	NA	1.11417	NA	NA	1
DNAJC27	NA	1.60671	NA	NA	1
SFMBT2	NA	1.25255	NA	NA	1
HIST1H2AM	NA	3.03386	NA	NA	1
CTSD	NA	-1.35518	NA	NA	1
ZNF658	NA	1.3496	NA	NA	1
RAD54B	NA	1.12138	NA	NA	1
PATL1	NA	1.34739	NA	NA	1
YRDC	NA	1.14823	NA	NA	1
DPM1	NA	1.05099	NA	NA	1
NUDT5	NA	-1.03894	NA	NA	1
CACTIN	NA	1.23614	NA	NA	1
CARD9	NA	1.92633	NA	NA	1
CSTF3	NA	1.33255	NA	NA	1
CST1	NA	-1.48375	NA	NA	1
RBMXL1	NA	1.05401	NA	NA	1
TUBB4A	NA	-1.94585	NA	NA	1
ZNF225	NA	1.22463	NA	NA	1
PLBD2	NA	-1.24352	NA	NA	1
PPT1	NA	-1.1744	NA	NA	1
EZH1	NA	1.06238	NA	NA	1
ZNF766	NA	1.1583	NA	NA	1
SFSWAP	NA	1.07573	NA	NA	1
TSC1	NA	1.01227	NA	NA	1
MAD2L1BP	NA	1.20932	NA	NA	1
ZNF185	NA	-1.2089	NA	NA	1
ZNF350	NA	1.81605	NA	NA	1
UBALD2	NA	1.29465	NA	NA	1
VDAC3	NA	-1.01392	NA	NA	1
TALDO1	NA	-1.03065	NA	NA	1
TCN2	NA	-1.54581	NA	NA	1
ZNF277	NA	1.02151	NA	NA	1
TBX4	NA	2.47882	NA	NA	1
ZNF778	NA	1.4527	NA	NA	1
PHF3	NA	1.07003	NA	NA	1
SPHK1	NA	1.44227	NA	NA	1
DDIT4	NA	1.59189	NA	NA	1
ZRSR2	NA	1.21038	NA	NA	1
ZNF674-AS1	NA	2.21472	NA	NA	1
LHPP	NA	-1.47662	NA	NA	1
SGCD	NA	-1.52529	NA	NA	1
LDHAL6B	NA	3.22484	NA	NA	1
LCORL	NA	1.74381	NA	NA	1
STMN4	NA	5.00658	NA	NA	1
TSPAN4	NA	-1.25401	NA	NA	1
CLPB	NA	-1.05763	NA	NA	1
CRIP1	NA	-1.18654	NA	NA	1
PPM1E	NA	3.33151	NA	NA	1
HOXD11	NA	2.36895	NA	NA	1
C12orf57	NA	-1.19096	NA	NA	1
MKLN1	NA	1.17939	NA	NA	1
NRIP1	NA	1.4392	NA	NA	1
AGA	NA	-1.32245	NA	NA	1
GTF2B	NA	1.45193	NA	NA	1
MEA1	NA	-1.01341	NA	NA	1
SNHG15	NA	1.15079	NA	NA	1
AKR1B10	NA	-1.89971	NA	NA	1
GPATCH2L	NA	1.18273	NA	NA	1
FNBP4	NA	1.16437	NA	NA	1
KRT86	NA	-1.20199	NA	NA	1
TCF7L2	NA	1.23109	NA	NA	1
RBM33	NA	1.16532	NA	NA	1
CBLL1	NA	1.053	NA	NA	1
C16orf91	NA	1.05549	NA	NA	1
[truncated: 2,145 more rows]

## Sheet: Table S3
Gene	Direction of gene expression change (relative to non-infected sample)
ABL2	up
ABTB2	up
ACHE	up
ACTN2	up
ADAM8	up
ADCY5	down
ADH1C	down
ADI1	down
ADM	up
ADM2	up
ADORA2A	up
ADPRM	up
AGBL2	up
AGR3	down
AIF1L	down
ALOXE3	up
ANGPT2	up
ANGPTL4	up
ANKRD12	up
ANKRD18B	up
ANKRD33B	up
ANXA13	down
ANXA9	down
APOBEC3D	up
APOBEC3F	up
APOL3	up
APOL6	up
ARAP2	up
ARC	up
AREG	up
ARID4B	up
ARL14	up
ARL4D	up
ARL5B	up
ARRDC3	up
ARRDC4	up
ASB9	down
ATAD2B	up
ATF3	up
ATF4	up
ATP4A	up
ATP6V0E2	down
B3GNT5	up
B3GNT7	up
BATF2	up
BAZ1A	up
BBC3	up
BCL10	up
BCL2A1	up
BCL3	up
BDKRB2	up
BHLHE40	up
BIRC3	up
BMP2	up
BMPER	up
BRICD5	down
BST2	up
BTC	up
BTG2	up
BTN2A2	up
BTN2A3P	up
C11orf96	up
C18orf25	up
C19orf66	up
C1orf162	up
C1R	up
C3	up
C5orf56	up
C6orf222	up
C6orf58	up
CAMK1G	up
CAT	down
CCDC116	up
CCDC174	up
CCDC74A	down
CCL2	up
CCL20	up
CCL4	up
CCL5	up
CCNL1	up
CD274	up
CDC14A	up
CDK17	up
CDKN2AIP	up
CENPI	down
CENPM	down
CEP350	up
CETN2	down
CFB	up
CFLAR-AS1	up
CHD2	up
CLDN2	down
CLEC4E	up
CLK1	up
CLK4	up
CLUHP3	up
CMPK2	up
CNFN	down
CNOT4	up
COL11A2	up
COMMD4	down
COMMD9	down
CPEB2	up
CPEB3	up
CPEB4	up
CREB5	up
CREBRF	up
CRIP2	down
CSF1	up
CSF2	up
CSF3	up
CSRNP1	up
CTDSPL	down
CX3CL1	up
CXCL1	up
CXCL10	up
CXCL11	up
CXCL2	up
CXCL3	up
CXXC4	up
CYLD	up
CYP1A1	up
CYP2B6	up
CYP2J2	up
DAPP1	up
DCHS1	up
DCP1A	up
DDC	down
DDIT3	up
DDX58	up
DDX60	up
DDX60L	up
DEGS2	down
DEPDC7	up
DHCR24	down
DHCR7	down
DHFR	down
DHX58	up
DLL1	up
DNAH17	up
DPYSL3	down
DTNA	up
DTX3L	up
DTYMK	down
DUSP1	up
DUSP10	up
DUSP16	up
DUSP8	up
DYRK1A	up
EBLN2	up
EBP	down
EFNA1	up
EGOT	up
EGR1	up
EGR2	up
EGR3	up
ELN	down
ENKUR	up
EPC1	up
EPSTI1	up
EREG	up
ETS1	up
ETS2	up
ETV3	up
ETV7	up
F3	up
FADS2	down
FAM151B	up
FASN	down
FBXO6	up
FDFT1	down
FDPS	down
FFAR4	down
FGF18	up
FGFR3	down
FIBCD1	down
FILIP1L	up
FLT3LG	up
FOS	up
FOSB	up
FOSL1	up
FOSL2	up
FOXN2	up
FOXO1	up
FRS2	up
FSD1L	up
FST	up
GABRR2	up
GADD45A	up
GADD45B	up
GALM	down
GATA6	up
GATM	down
GBP1	up
GBP3	up
GBP4	up
GBP5	up
GCH1	up
GDF15	up
GEM	up
GIMAP2	up
GJB1	down
GLCCI1	up
GMPR	up
GNA13	up
GPBP1	up
GPCPD1	up
GRM8	up
GUCA1B	up
H1F0	up
HADH	down
HAND1	up
HAS2	up
HCG27	up
HCP5	up
HDAC9	up
HDX	up
HELB	up
HELZ2	up
HERC5	up
HERC6	up
HIF1A-AS2	up
HIST1H1D	up
HIST1H1E	up
HIST1H2BG	up
HIST1H2BN	up
HIST1H3E	up
HIST1H4E	up
HIST2H2BF	up
HIST4H4	up
HIVEP1	up
HIVEP2	up
HLA-B	up
HLA-DOB	up
HLA-F	up
HLA-L	up
HOGA1	down
HSD17B7P2	up
HSH2D	up
HSPA6	up
ICAM1	up
ICAM4	up
ICAM5	up
IDO1	up
IER3	up
IER5	up
IFI16	up
IFI27	up
IFI35	up
IFI44	up
IFI44L	up
IFI6	up
IFIH1	up
IFIT1	up
IFIT2	up
IFIT3	up
IFIT5	up
IFITM1	up
IFITM2	up
IFITM3	up
IFNB1	up
IKZF3	up
IL10RA	up
IL11	up
IL15RA	up
IL17RB	down
IL1A	up
IL22RA1	up
IL23A	up
IL4I1	up
IL6	up
IL7	up
INE1	up
INHBA	up
INO80D	up
INTS6	up
IPCEF1	up
IRAK2	up
IRF1	up
IRF2	up
IRF7	up
IRF9	up
ISG15	up
ISG20	up
JAK2	up
JAM2	up
JMJD1C	up
JUN	up
JUNB	up
KCNN1	up
KCNT2	up
KDM6A	up
KDM6B	up
KHK	down
KIRREL2	up
KLF10	up
KLF4	up
KLF6	up
KLF9	up
KLKP1	up
KPNA5	up
LAMP3	up
LATS1	up
LEKR1	up
LGALS9	up
LIF	up
LIG4	up
LINC00605	up
LINC00654	up
LMO2	up
LPA	up
LST1	up
LTA	up
LTB	up
LYST	up
MAFB	up
MAFF	up
MAK	up
MALAT1	up
MALL	down
MAP3K8	up
MAST4	up
MATN1-AS1	up
MATN4	up
MB21D2	up
MCF2L2	up
MCM5	down
MCM6	down
MEG9	up
MEIS1	up
METTL7B	down
MIER1	up
MIPEP	down
MIR221	up
MIR3191	up
MIR568	up
MLKL	up
MMP13	up
MOB3C	up
MOBP	up
MORC3	up
MVD	down
MX1	up
MX2	up
MXD1	up
MYD88	up
MYLK	down
MZT2B	down
N4BP3	up
NACAD	up
NAMPT	up
NAV2	up
NCOA7	up
NDUFB2	down
NDUFB7	down
NEAT1	up
NEDD9	up
NEURL3	up
NFAT5	up
NFKB1	up
NFKB2	up
NFKBIA	up
NFKBIE	up
NFKBIZ	up
NGFR	up
NHLH1	up
NKAIN1	up
NKD2	up
NKX3-1	up
NLRC5	up
NOD2	up
NPTX1	up
NR1D1	up
NR3C1	up
NR4A2	up
NRGN	down
NSDHL	down
NT5DC2	down
NUAK2	up
NUDT8	down
OAS1	up
OAS2	up
OAS3	up
OASL	up
ODF3B	up
OGFR	up
OGFRL1	up
OTUD1	up
OVOL1	up
PAPOLG	up
PARD6B	up
PARP10	up
PARP12	up
PARP14	up
PARP8	up
PARP9	up
PCK1	up
PCSK9	down
PDE4B	up
PDE4D	up
PDGFD	down
PDZD2	up
PELI1	up
PER2	up
PGP	down
PHB	down
PHF11	up
PIGZ	down
PIK3AP1	up
PIM1	up
PIM3	up
PIN1	down
PINLYP	up
PLAUR	up
PLD6	up
PLEKHA4	up
PLK3	up
PLSCR1	up
PMAIP1	up
PML	up
PMS2CL	up
PNPT1	up
PNRC1	up
POLD2	down
POLR2L	down
POU2F2	up
PPM1K	up
PPP1R15A	up
PPP1R15B	up
PPP4R4	up
PPTC7	up
PRDM1	up
PRG2	up
PRKDC	down
PROC	down
PROX1	up
PRRT3-AS1	down
PSTPIP2	up
PTGS2	up
PTX3	up
PYGM	up
RAB26	down
RAB30	up
RASGRP1	up
RBAK	up
RCAN1	up
REC8	up
REEP6	down
REL	up
RELB	up
RERG	down
RFPL3S	up
RGS16	up
RICTOR	up
RIMKLB	up
RLF	up
RND1	up
RNF111	up
RNF112	up
RNF19B	up
RNLS	down
ROCK1P1	up
RORA	up
RPLP0P2	up
RSAD2	up
RSRC2	up
RTP4	up
RUFY4	up
RUNX2	up
SAA2	up
SAMD9	up
SAMD9L	up
SAMHD1	up
SAMSN1	up
SATB2	up
SCARA3	down
SCD	down
SCGN	down
SCNN1G	up
SDC1	down
SDC4	up
SEC24A	up
SECTM1	up
SELE	up
SEMA7A	up
SERINC4	up
SERTAD2	up
SHMT1	down
SIDT1	up
SIK1	up
SIX4	up
SKIL	up
SLC17A4	down
SLC22A18AS	down
SLC25A1	down
SLC25A10	down
SLC25A25	up
SLC25A28	up
SLC5A5	up
SLC6A12	up
SLC6A13	up
SLC6A20	down
SLC9A3R1	down
SLCO5A1	up
SLIRP	down
SMCHD1	up
SMPD3	up
SNAI1	up
SNCAIP	up
SNIP1	up
SNRNP25	down
SNX16	up
SOCS1	up
SOCS2	up
SOCS2-AS1	up
SOCS3	up
SOX9	up
SP110	up
SP8	up
SPRY2	up
SRFBP1	up
SSTR2	up
ST7-AS1	up
STARD8	up
STAT1	up
STAT2	up
STAT5A	up
STX11	up
STX1B	up
SUGT1P1	up
SUMF1	down
SUMO4	up
TBC1D22B	up
TBX15	up
TET2	up
TEX14	up
TEX15	down
THEM6	down
THEMIS2	up
TIAM2	up
TICAM1	up
TIPARP	up
TLE4	up
TLK2	up
TLR2	up
TLR3	up
TM4SF4	down
TM7SF2	down
TMEM97	down
TMPRSS3	up
TMX4	down
TNF	up
TNFAIP3	up
TNFRSF9	up
TNFSF10	up
TNFSF13B	up
TNFSF14	up
TNS1	up
TPPP3	down
TRAF1	up
TRANK1	up
TRIM22	up
TRIM31	up
TRIM36	up
TRIM38	up
TRIM69	up
TSC22D2	up
TSPAN8	down
TUBA1A	down
TXNIP	up
UBA7	up
UBASH3A	up
UBE2L6	up
UBE2Q2P1	up
UBN2	up
UCP2	down
UGT2B15	down
USP18	up
USP43	up
VEGFA	up
VIL1	down
VIM	down
WDR34	down
WHAMM	up
XAF1	up
XRN1	up
YOD1	up
ZBED5	up
ZBP1	up
ZBTB10	up
ZBTB20	up
ZBTB21	up
ZBTB43	up
ZC3H12A	up
ZC3H12C	up
ZCCHC2	up
ZEB2	up
ZFP36	up
ZFPM2	up
ZNF107	up
ZNF14	up
ZNF217	up
ZNF222	up
ZNF254	up
ZNF267	up
ZNF274	up
ZNF292	up
ZNF296	up
ZNF300P1	up
ZNF317	up
ZNF333	up
ZNF426	up
ZNF431	up
ZNF436	up
ZNF44	up
ZNF441	up
ZNF460	up
ZNF462	up
ZNF484	up
ZNF488	down
ZNF501	up
ZNF502	up
ZNF503	up
ZNF543	up
ZNF562	up
ZNF596	up
ZNF627	up
ZNF671	up
ZNF675	up
ZNF697	up
ZNF708	up
ZNF805	up
ZNF92	up
ZNFX1	up
ZSCAN12	up
ZSWIM4	up

## Sheet: Table S4
Cluster	ID	Description	GeneRatio	BgRatio	FDR	DEGs
Overexpressed DEGs	GO:0009615	response to virus	64/472	323/18670	3.16306e-35	APOBEC3D, APOBEC3F, BCL3, BIRC3, BST2, CCL4, CCL5, CXCL10, CYP1A1, DDX58, DDX60, DHX58, DTX3L, FOSL1, GBP1, GBP3, HERC5, IFI16, IFI27, IFI44, IFI44L, IFI6, IFIH1, IFIT1, IFIT2, IFIT3, IFIT5, IFITM1, IFITM2, IFITM3, IFNB1, IL23A, IL6, IRF1, IRF2, IRF7, IRF9, ISG15, ISG20, LGALS9, LYST, MX1, MX2, NLRC5, OAS1, OAS2, OAS3, OASL, PARP9, PLSCR1, PMAIP1, PML, RSAD2, RTP4, SAMHD1, STAT1, STAT2, TICAM1, T…
	GO:0060337	type I interferon signaling pathway	35/472	95/18670	8.66763e-29	BST2, EGR1, HLA-B, HLA-F, IFI27, IFI35, IFI6, IFIT1, IFIT2, IFIT3, IFITM1, IFITM2, IFITM3, IFNB1, IRF1, IRF2, IRF7, IRF9, ISG15, ISG20, MX1, MX2, MYD88, NLRC5, OAS1, OAS2, OAS3, OASL, RSAD2, SAMHD1, STAT1, STAT2, USP18, XAF1, ZBP1
	GO:0071357	cellular response to type I interferon	35/472	95/18670	8.66763e-29	BST2, EGR1, HLA-B, HLA-F, IFI27, IFI35, IFI6, IFIT1, IFIT2, IFIT3, IFITM1, IFITM2, IFITM3, IFNB1, IRF1, IRF2, IRF7, IRF9, ISG15, ISG20, MX1, MX2, MYD88, NLRC5, OAS1, OAS2, OAS3, OASL, RSAD2, SAMHD1, STAT1, STAT2, USP18, XAF1, ZBP1
	GO:0048525	negative regulation of viral process	31/472	101/18670	1.17139e-22	APOBEC3D, APOBEC3F, BST2, CCL4, CCL5, IFI16, IFIT1, IFIT5, IFITM1, IFITM2, IFITM3, IFNB1, ISG15, ISG20, JUN, MIR221, MX1, OAS1, OAS3, OASL, PARP10, PLSCR1, PML, PROX1, PTX3, RSAD2, STAT1, TNF, TRIM31, ZC3H12A, ZFP36
	GO:0061900	glial cell activation	10/472	58/18670	4.29078e-05	ADORA2A, CX3CL1, IL6, JAK2, JUN, NAMPT, NR1D1, TLR2, TLR3, TNF
	GO:0150076	neuroinflammatory response	11/472	75/18670	6.25883e-05	ADORA2A, CX3CL1, IL6, JAK2, JUN, NAMPT, NR1D1, PTGS2, TLR2, TLR3, TNF
	GO:0062207	regulation of pattern recognition receptor signaling pathway	12/472	93/18670	8.09337e-05	BIRC3, DDX60, DHX58, IRF1, IRF7, NR1D1, PELI1, RSAD2, TICAM1, TLR2, TLR3, TNFAIP3
	GO:0043392	negative regulation of DNA binding	9/472	54/18670	0.000132806	DDIT3, HAND1, IFI16, JAK2, JUN, NFKBIA, PER2, ZNF462, ZNF675
	GO:0062197	cellular response to chemical stress	24/472	350/18670	0.000174459	ATF4, BDKRB2, CPEB2, DDIT3, ETS1, FOS, FOXO1, GCH1, IL6, JAK2, JUN, KDM6B, KLF4, NCOA7, NR4A2, PML, PNPT1, PTGS2, RELB, RNF112, SMPD3, TNF, TNFAIP3, ZC3H12A
	GO:0062208	positive regulation of pattern recognition receptor signaling pathway	6/472	34/18670	0.00174978	DDX60, DHX58, PELI1, RSAD2, TLR2, TLR3
	GO:0110110	positive regulation of animal organ morphogenesis	9/472	81/18670	0.00189106	BMP2, CSF1, FRS2, LIF, PIM1, SIX4, SOX9, TNFAIP3, VEGFA
	GO:0104004	cellular response to environmental stimulus	19/472	331/18670	0.00568031	ATF4, BCL10, BDKRB2, EGR1, GADD45A, GUCA1B, IFI16, IRF1, LIG4, MYD88, NAMPT, NFKB1, PCK1, PTGS2, RELB, SOX9, TLK2, TLR3, TNFSF14
	GO:0140052	cellular response to oxidised low-density lipoprotein particle stimulus	3/472	10/18670	0.00997893	MYD88, SMPD3, TICAM1
	GO:1905332	positive regulation of morphogenesis of an epithelium	5/472	35/18670	0.0101183	LIF, MIR221, SIX4, SOX9, VEGFA
	GO:0062013	positive regulation of small molecule metabolic process	10/472	143/18670	0.0172492	ADM, FOXO1, GUCA1B, HAS2, NFKB1, NR1D1, PMAIP1, PTGS2, TNF, ZBTB20
	GO:0150077	regulation of neuroinflammatory response	5/472	41/18670	0.0176564	CX3CL1, IL6, NR1D1, PTGS2, TNF
	GO:0062098	regulation of programmed necrotic cell death	4/472	26/18670	0.0183229	BIRC3, CYLD, MIR221, PELI1
	GO:0034504	protein localization to nucleus	14/472	262/18670	0.0283101	BCL3, DTX3L, KPNA5, LIF, MORC3, NFKBIA, NGFR, PARP9, PML, PTGS2, SIX4, SOX9, TXNIP, ZC3H12A
	GO:0019369	arachidonic acid metabolic process	5/472	51/18670	0.0349723	ALOXE3, CYP1A1, CYP2B6, CYP2J2, PTGS2
Underexpressed DEGs	GO:0006695	cholesterol biosynthetic process	10/94	75/18670	3.70816e-09	DHCR24, DHCR7, EBP, FASN, FDFT1, FDPS, MVD, NSDHL, SCD, TM7SF2
	GO:1902653	secondary alcohol biosynthetic process	10/94	76/18670	3.70816e-09	DHCR24, DHCR7, EBP, FASN, FDFT1, FDPS, MVD, NSDHL, SCD, TM7SF2
	GO:0106118	regulation of sterol biosynthetic process	7/94	50/18670	7.92942e-07	DHCR7, FASN, FDFT1, FDPS, MVD, SCD, TM7SF2
	GO:0120162	positive regulation of cold-induced thermogenesis	5/94	97/18670	0.0109013	FFAR4, GATM, HADH, SCD, UCP2
	GO:0006732	coenzyme metabolic process	7/94	255/18670	0.0220442	DHFR, FASN, MVD, RNLS, SCD, SHMT1, SLC25A1
	GO:0062012	regulation of small molecule metabolic process	9/94	431/18670	0.0223151	DHCR7, FASN, FDFT1, FDPS, KHK, MVD, PGP, SCD, TM7SF2
	GO:0106106	cold-induced thermogenesis	5/94	143/18670	0.0429126	FFAR4, GATM, HADH, SCD, UCP2
	GO:0120161	regulation of cold-induced thermogenesis	5/94	143/18670	0.0429126	FFAR4, GATM, HADH, SCD, UCP2

## Sheet: Table S5
GO term (Biological Process)	Definition
cytoplasmic pattern recognition receptor signaling pathway in response to virus	Any series of molecular signals generated as a consequence of a virus or viral RNA binding to a pattern recognition receptor (PRR) located in the cytoplasm. Cytosolic PRRs such as RIG-I (DDX58) and MDA-5 (IFIH1) detect RNA synthesized during active viral replication and trigger a signaling pathway to protect the host against viral infection, for example by inducing the expression of antiviral cyt…
defense response to virus	Reactions triggered in response to the presence of a virus that act to protect the cell or organism.
negative regulation by host of viral process	A process in which a host organism stops, prevents or reduces the frequency, rate or extent of a process being mediated by a virus with which it is infected.
negative regulation by host of viral transcription	Any process in which a host organism stops, prevents, or reduces the frequency, rate or extent of viral transcription.
negative regulation of defense response	Any process that stops, prevents, or reduces the frequency, rate or extent of a defense response.
negative regulation of viral entry into host cell	Any process that stops, prevents, or reduces the frequency, rate or extent of the entry of viral entry into a host cell.
negative regulation of viral genome replication	Any process that stops, prevents, or reduces the frequency, rate or extent of viral genome replication.
negative regulation of viral life cycle	Any process that stops, prevents or reduces the frequency, rate or extent of viral life cycle.
negative regulation of viral process	Any process that stops, prevents, or reduces the frequency, rate or extent of a multi-organism process in which a virus is a participant.
negative regulation of viral transcription	Any process that stops, prevents, or reduces the frequency, rate or extent of viral transcription.
positive regulation of defense response	Any process that activates or increases the frequency, rate or extent of a defense response.
positive regulation of defense response to virus by host	Any host process that results in the promotion of antiviral immune response mechanisms, thereby limiting viral replication.

## Sheet: Table S6
Gene	Direction of gene expression change (relative to non-infected sample)
ABL2	up
ABTB2	up
ACHE	up
ACTN2	up
ADCY5	down
ADH1C	down
ADI1	down
ADM	up
ADM2	up
ADPRM	up
AGBL2	up
AGR3	down
AIF1L	down
ALOXE3	up
ANGPT2	up
ANGPTL4	up
ANKRD12	up
ANKRD18B	up
ANKRD33B	up
ANXA13	down
ANXA9	down
APOL3	up
APOL6	up
ARAP2	up
ARC	up
AREG	up
ARID4B	up
ARL14	up
ARL4D	up
ARL5B	up
ARRDC3	up
ARRDC4	up
ASB9	down
ATAD2B	up
ATF3	up
ATF4	up
ATP4A	up
ATP6V0E2	down
B3GNT5	up
B3GNT7	up
BATF2	up
BAZ1A	up
BBC3	up
BCL2A1	up
BCL3	up
BDKRB2	up
BHLHE40	up
BMP2	up
BMPER	up
BRICD5	down
BTC	up
BTG2	up
BTN2A2	up
BTN2A3P	up
C11orf96	up
C18orf25	up
C19orf66	up
C1orf162	up
C1R	up
C5orf56	up
C6orf222	up
C6orf58	up
CAMK1G	up
CAT	down
CCDC116	up
CCDC174	up
CCDC74A	down
CCL2	up
CCL20	up
CCNL1	up
CD274	up
CDC14A	up
CDK17	up
CDKN2AIP	up
CENPI	down
CENPM	down
CEP350	up
CETN2	down
CFB	up
CFLAR-AS1	up
CHD2	up
CLDN2	down
CLK1	up
CLK4	up
CLUHP3	up
CMPK2	up
CNFN	down
CNOT4	up
COL11A2	up
COMMD4	down
COMMD9	down
CPEB2	up
CPEB3	up
CPEB4	up
CREB5	up
CREBRF	up
CRIP2	down
CSF1	up
CSF2	up
CSF3	up
CSRNP1	up
CTDSPL	down
CXCL1	up
CXCL11	up
CXCL2	up
CXCL3	up
CXXC4	up
CYLD	up
CYP1A1	up
CYP2B6	up
CYP2J2	up
DAPP1	up
DCHS1	up
DCP1A	up
DDC	down
DDIT3	up
DDX60L	up
DEGS2	down
DEPDC7	up
DHCR24	down
DHCR7	down
DHFR	down
DLL1	up
DNAH17	up
DPYSL3	down
DTNA	up
DTYMK	down
DUSP1	up
DUSP16	up
DUSP8	up
DYRK1A	up
EBLN2	up
EBP	down
EFNA1	up
EGOT	up
EGR1	up
EGR2	up
EGR3	up
ELN	down
ENKUR	up
EPC1	up
EPSTI1	up
ETS2	up
ETV3	up
ETV7	up
F3	up
FADS2	down
FAM151B	up
FASN	down
FBXO6	up
FDFT1	down
FDPS	down
FFAR4	down
FGF18	up
FGFR3	down
FIBCD1	down
FILIP1L	up
FLT3LG	up
FOS	up
FOSB	up
FOSL1	up
FOSL2	up
FOXN2	up
FOXO1	up
FRS2	up
FSD1L	up
FST	up
GABRR2	up
GADD45A	up
GADD45B	up
GALM	down
GATA6	up
GATM	down
GBP4	up
GCH1	up
GDF15	up
GEM	up
GIMAP2	up
GJB1	down
GLCCI1	up
GMPR	up
GNA13	up
GPBP1	up
GPCPD1	up
GRM8	up
GUCA1B	up
H1F0	up
HADH	down
HAND1	up
HAS2	up
HCG27	up
HCP5	up
HDAC9	up
HDX	up
HELB	up
HELZ2	up
HERC6	up
HIF1A-AS2	up
HIST1H1D	up
HIST1H1E	up
HIST1H2BG	up
HIST1H2BN	up
HIST1H3E	up
HIST1H4E	up
HIST2H2BF	up
HIST4H4	up
HIVEP1	up
HIVEP2	up
HLA-B	up
HLA-DOB	up
HLA-L	up
HOGA1	down
HSD17B7P2	up
HSH2D	up
HSPA6	up
ICAM1	up
ICAM4	up
ICAM5	up
IER3	up
IER5	up
IFI35	up
IFI44	up
IKZF3	up
IL10RA	up
IL11	up
IL15RA	up
IL17RB	down
IL1A	up
IL22RA1	up
IL4I1	up
IL7	up
INE1	up
INHBA	up
INO80D	up
INTS6	up
IPCEF1	up
IRAK2	up
JAM2	up
JMJD1C	up
JUNB	up
KCNN1	up
KCNT2	up
KDM6A	up
KDM6B	up
KHK	down
KIRREL2	up
KLF10	up
KLF6	up
KLF9	up
KLKP1	up
KPNA5	up
LAMP3	up
LATS1	up
LEKR1	up
LIF	up
LIG4	up
LINC00605	up
LINC00654	up
LMO2	up
LPA	up
LST1	up
LTB	up
MAFB	up
MAFF	up
MAK	up
MALAT1	up
MALL	down
MAP3K8	up
MAST4	up
MATN1-AS1	up
MATN4	up
MB21D2	up
MCF2L2	up
MCM5	down
MCM6	down
MEG9	up
MEIS1	up
METTL7B	down
MIER1	up
MIPEP	down
MIR3191	up
MIR568	up
MLKL	up
MMP13	up
MOB3C	up
MOBP	up
MORC3	up
MVD	down
MXD1	up
MYLK	down
MZT2B	down
N4BP3	up
NACAD	up
NAMPT	up
NAV2	up
NCOA7	up
NDUFB2	down
NDUFB7	down
NEDD9	up
NEURL3	up
NFAT5	up
NFKB2	up
NFKBIE	up
NGFR	up
NHLH1	up
NKAIN1	up
NKD2	up
NKX3-1	up
NPTX1	up
NR3C1	up
NR4A2	up
NRGN	down
NSDHL	down
NT5DC2	down
NUAK2	up
NUDT8	down
ODF3B	up
OGFR	up
OGFRL1	up
OTUD1	up
OVOL1	up
PAPOLG	up
PARD6B	up
PARP12	up
PARP8	up
PCK1	up
PCSK9	down
PDE4B	up
PDE4D	up
PDGFD	down
PDZD2	up
PELI1	up
PER2	up
PGP	down
PHB	down
PHF11	up
PIGZ	down
PIK3AP1	up
PIM1	up
PIM3	up
PIN1	down
PINLYP	up
PLAUR	up
PLD6	up
PLEKHA4	up
PLK3	up
PMS2CL	up
PNPT1	up
PNRC1	up
POLD2	down
POLR2L	down
POU2F2	up
PPM1K	up
PPP1R15A	up
PPP1R15B	up
PPP4R4	up
PPTC7	up
PRDM1	up
PRG2	up
PRKDC	down
PROC	down
PRRT3-AS1	down
PSTPIP2	up
PYGM	up
RAB26	down
RAB30	up
RBAK	up
RCAN1	up
REC8	up
REEP6	down
REL	up
RERG	down
RFPL3S	up
RGS16	up
RICTOR	up
RIMKLB	up
RLF	up
RND1	up
RNF111	up
RNF112	up
RNF19B	up
RNLS	down
ROCK1P1	up
RPLP0P2	up
RSRC2	up
RUFY4	up
RUNX2	up
SAA2	up
SAMD9	up
SAMD9L	up
SAMSN1	up
SATB2	up
SCARA3	down
SCD	down
SCGN	down
SCNN1G	up
SDC1	down
SDC4	up
SEC24A	up
SECTM1	up
SELE	up
SEMA7A	up
SERINC4	up
SERTAD2	up
SHMT1	down
SIDT1	up
SIK1	up
SIX4	up
SKIL	up
SLC17A4	down
SLC22A18AS	down
SLC25A1	down
SLC25A10	down
SLC25A25	up
SLC25A28	up
SLC5A5	up
SLC6A12	up
SLC6A13	up
SLC6A20	down
SLC9A3R1	down
SLCO5A1	up
SLIRP	down
SMCHD1	up
SMPD3	up
SNAI1	up
SNCAIP	up
SNIP1	up
SNRNP25	down
SNX16	up
SOCS1	up
SOCS2	up
SOCS2-AS1	up
SOX9	up
SP110	up
SP8	up
SPRY2	up
SRFBP1	up
SSTR2	up
ST7-AS1	up
STARD8	up
STAT5A	up
STX11	up
STX1B	up
SUGT1P1	up
SUMF1	down
SUMO4	up
TBC1D22B	up
TBX15	up
TET2	up
TEX14	up
TEX15	down
THEM6	down
THEMIS2	up
TIAM2	up
TIPARP	up
TLE4	up
TLK2	up
TM4SF4	down
TM7SF2	down
TMEM97	down
TMPRSS3	up
TMX4	down
TNFRSF9	up
TNFSF10	up
TNFSF13B	up
TNFSF14	up
TNS1	up
TPPP3	down
TRAF1	up
TRANK1	up
TRIM36	up
TRIM69	up
TSC22D2	up
TSPAN8	down
TUBA1A	down
TXNIP	up
UBA7	up
UBASH3A	up
UBE2L6	up
UBE2Q2P1	up
UBN2	up
UCP2	down
UGT2B15	down
USP18	up
USP43	up
VEGFA	up
VIL1	down
VIM	down
WDR34	down
WHAMM	up
XAF1	up
XRN1	up
YOD1	up
ZBED5	up
ZBTB10	up
ZBTB20	up
ZBTB21	up
ZBTB43	up
ZC3H12C	up
ZCCHC2	up
ZEB2	up
ZFPM2	up
ZNF107	up
ZNF14	up
ZNF217	up
ZNF222	up
ZNF254	up
ZNF267	up
ZNF274	up
ZNF292	up
ZNF296	up
ZNF300P1	up
ZNF317	up
ZNF333	up
ZNF426	up
ZNF431	up
ZNF436	up
ZNF44	up
ZNF441	up
ZNF460	up
ZNF462	up
ZNF484	up
ZNF488	down
ZNF501	up
ZNF502	up
ZNF503	up
ZNF543	up
ZNF562	up
ZNF596	up
ZNF627	up
ZNF671	up
ZNF675	up
ZNF697	up
ZNF708	up
ZNF805	up
ZNF92	up
ZNFX1	up
ZSCAN12	up
ZSWIM4	up

## Sheet: Table S7
Drug	Molecular formula	Canonical SMILES	Chemical class	Pharmacological class	Mechanism of Action (MOA)	ATC Code level I	ATC Code level II	Cellular location
Alimemazine	C18H22N2S	CC(CN1C2=CC=CC=C2SC3=CC=CC=C31)CN(C)C	Phenothiazine	Antiallergic agent	Histamine receptor antagonist	R - Respiratory system	R06 - Antihistamines for systemic use	Membrane
Amifostine	C5H15N2O3PS	C(CN)CNCCSP(=O)(O)O	Organothiophosphate	Radiation protective agent	Reduction activity	V - Various	V03 - All other therapeutic products	Membrane
Atovaquone	C22H19ClO3	C1CC(CCC1C2=CC=C(C=C2)Cl)C3=C(C4=CC=CC=C4C(=O)C3=O)O	Hydroxynaphthoquinone	Antiinfective agent (antiprotozoal)	Protozoal mitochondrial electron transport inhibitor	P - Antiparasitic products, insecticides and repellents	P01 - Antiprotozoals	(information missing)
Azithromycin	C38H72N2O12	CCC1C(C(C(N(CC(CC(C(C(C(C(C(=O)O1)C)OC2CC(C(C(O2)C)O)(C)OC)C)OC3C(C(CC(O3)C)N(C)C)O)(C)O)C)C)C)O)(C)O	Macrolide (antibiotic)	Antiinfective agent (antibacterial)	Bacterial 50S ribosomal subunit inhibitor	J - Antiinfectives for systemic use	J01 - Antibacterials for systemic use	Membrane, cytoplasm
Cinacalcet	C22H22F3N	CC(C1=CC=CC2=CC=CC=C21)NCCCC3=CC(=CC=C3)C(F)(F)F	Secondary amino compound	Calcimimetic agent	Calcium-sensing receptor agonist	H - Systemic hormonal preparations, excl. sex hormones and insulins	H05 - Calcium homeostasis	Membrane
Clebopride	C20H24ClN3O2	COC1=CC(=C(C=C1C(=O)NC2CCN(CC2)CC3=CC=CC=C3)Cl)N	Piperidine	Antiemetic agent	Dopamine receptor antagonist	A - Alimentary tract and metabolism	A03 - Drugs for functional gastrointestinal disorders	(information missing)
Darifenacin	C28H30N2O2	C1CN(CC1C(C2=CC=CC=C2)(C3=CC=CC=C3)C(=O)N)CCC4=CC5=C(C=C4)OCC5	Pyrrolidine	Anticholinergic agent	Cholinergic muscarinic antagonist	G - Genito urinary system and sex hormones	G04 - Urologicals	Membrane
Dilazep	C31H44N2O10	COC1=CC(=CC(=C1OC)OC)C(=O)OCCCN2CCCN(CC2)CCCOC(=O)C3=CC(=C(C(=C3)OC)OC)OC	Trihydroxybenzoic acid	Antihypertensive agent (vasodilatator)	Adenosine reuptake inhibitor	C - Cardiovascular system	C01 - Cardiac therapy	(information missing)
Diphenidol	C21H27NO	C1CCN(CC1)CCCC(C2=CC=CC=C2)(C3=CC=CC=C3)O	Tertiary alcohol	Antiemetic agent	Acetylcholine receptor inhibitor	NA	NA	Membrane
Econazole	C18H15Cl3N2O	C1=CC(=CC=C1COC(CN2C=CN=C2)C3=C(C=C(C=C3)Cl)Cl)Cl	Imidazole	Antiinfective agent (antifungal)	Fungal cytochrome P450 inhibitor (14-alpha demethylase inhibitors)	D - Dermatologicals ; G - Genito urinary system and sex hormones	D01 - Antifungals for dermatological use ; G01 - Gynecological antiinfectives and antiseptics	Membrane
Etamsylate	C10H17NO5S	CCNCC.C1=CC(=C(C=C1O)S(=O)(=O)O)O	Benzenesulfonate	Hemostatic agent	Hemostatic	B - Blood and blood forming organs	B02 - Antihemorrhagics	(information missing)
Fluoxetine	C17H18F3NO	CNCCC(C1=CC=CC=C1)OC2=CC=C(C=C2)C(F)(F)F	Secondary amino compound	Antidepressant agent	Selective serotonin reuptake inhibitor	N - Nervous system	N06 - Psychoanaleptics	Membrane
Fluspirilene	C29H31F2N3O	C1CN(CCC12C(=O)NCN2C3=CC=CC=C3)CCCC(C4=CC=C(C=C4)F)C5=CC=C(C=C5)F	Diarylmethane	Antipsychotic agent	Dopamine receptor antagonist	N - Nervous system	N05 - Psycholeptics	Membrane
Gabapentin	C9H17NO2	C1CCC(CC1)(CC(=O)O)CN	Gamma-amino acid	Anticonvulsant agent	Excitatory neuron activity inhibitor	N - Nervous system	N03 - Antiepileptics	(information missing)
Gliclazide	C15H21N3O3S	CC1=CC=C(C=C1)S(=O)(=O)NC(=O)NN2CC3CCCC3C2	N-sulfonylurea	Hypoglycemic agent	ATP sensitive potassium channel inhibitor	A - Alimentary tract and metabolism	A10 - Drugs used in diabetes	Membrane, extracellular
Ibutilide	C20H36N2O3S	CCCCCCCN(CC)CCCC(C1=CC=C(C=C1)NS(=O)(=O)C)O	Organic amino compound	Antiarrhythmia agent	Potassium channel blocker	C - Cardiovascular system	C01 - Cardiac therapy	Membrane, cytoplasm
Imatinib	C29H31N7O	CC1=C(C=C(C=C1)NC(=O)C2=CC=C(C=C2)CN3CCN(CC3)C)NC4=NC=CC(=N4)C5=CN=CC=C5	Aromatic amine	Antineoplastic agent	Tyrosine kinase receptor inhibitor	L - Antineoplastic and immunomodulating agents	L01 - Antineoplastic agents	Membrane, cytoplasm
Iopamidol	C17H22I3N3O8	CC(C(=O)NC1=C(C(=C(C(=C1I)C(=O)NC(CO)CO)I)C(=O)NC(CO)CO)I)O	Pentol	Radiographic contrast agent	X-ray contrast activity	V - Various	V08 - Contrast media	Extracellular
Itraconazole	C35H38Cl2N8O4	CCC(C)N1C(=O)N(C=N1)C2=CC=C(C=C2)N3CCN(CC3)C4=CC=C(C=C4)OCC5COC(O5)(CN6C=NC=N6)C7=C(C=C(C=C7)Cl)Cl	Piperazine	Antiinfective agent (antifungal)	Fungal cytochrome P450 inhibitor (14-alpha demethylase inhibitors)	J - Antiinfectives for systemic use	J02 - Antimycotics for systemic use	Membrane
Ketoconazole	C26H28Cl2N4O4	CC(=O)N1CCN(CC1)C2=CC=C(C=C2)OCC3COC(O3)(CN4C=CN=C4)C5=C(C=C(C=C5)Cl)Cl	N-arylpiperazine	Antiinfective agent (antifungal)	Fungal cytochrome P450 inhibitor (14-alpha demethylase inhibitors)	D - Dermatologicals ; G - Genito urinary system and sex hormones ; J - Antiinfectives for systemic use	D01 - Antifungals for dermatological use ; G01 - Gynecological antiinfectives and antiseptics ; J02 - Antimycotics for systemic use	Membrane
Levobunolol	C17H25NO3	CC(C)(C)NCC(COC1=CC=CC2=C1CCCC2=O)O	Propanolamine	Sympatholytic agent	Beta-adrenergic receptor antagonist	S - Sensory organs	S01 - Ophthalmologicals	Membrane
Lonidamine	C15H10Cl2N2O2	C1=CC=C2C(=C1)C(=NN2CC3=C(C=C(C=C3)Cl)Cl)C(=O)O	Monocarboxylic acid	Antineoplastic agent	Glucokinase inhibitor	L - Antineoplastic and immunomodulating agents	L01 - Antineoplastic agents	(information missing)
Memantine	C12H21N	CC12CC3CC(C1)(CC(C3)(C2)N)C	Primary aliphatic amine	Neuroprotective agent	N-methyl-D-aspartate glutamate receptor antagonist	N - Nervous system	N06 - Psychoanaleptics	Membrane
Metolazone	C16H16ClN3O3S	CC1NC2=CC(=C(C=C2C(=O)N1C3=CC=CC=C3C)S(=O)(=O)N)Cl	Quinazolines	Antihypertensive agent (diuretic)	Sodium chloride symporter inhibitor	C - Cardiovascular system	C03 - Diuretics	Membrane
Nalidixic acid	C12H12N2O3	CCN1C=C(C(=O)C2=C1N=C(C=C2)C)C(=O)O	Monocarboxylic acid	Antiinfective agent (antibacterial)	Bacterial topoisomerase II inhibitor	J - Antiinfectives for systemic use	J01 - Antibacterials for systemic use	Cytoplasm
Niacin	C5H4NCOOH	C1=CC(=CN=C1)C(=O)O	Pyridinemonocarboxylic acid (vitamin B complex)	Antihypertensive agent (vasodilatator, hypolipidemic)	Lowering cholesterol	C - Cardiovascular system ; A - Alimentary tract and metabolism	C04 - Peripheral vasodilators ; C10 - Lipid modifying agents ; A11 - Vitamins	Cytoplasm, extracellular
Nortriptyline	C19H21N	CNCCC=C1C2=CC=CC=C2CCC3=CC=CC=C31	Secondary amine	Antidepressant agent	Adrenergic uptake inhibitor	N - Nervous system	N06 - Psychoanaleptics	Membrane, cytoplasm, extracellular
Perindopril	C19H32N2O5	CCCC(C(=O)OCC)NC(C)C(=O)N1C2CCCCC2CC1C(=O)O	Dicarboxylic acid monoester	Antihypertensive agent	Angiotensin converting enzyme inhibitor	C - Cardiovascular system	C09 - Agents acting on the renin-angiotensin system	Membrane, cytoplasm, extracellular
Reboxetine	C19H23NO3	CCOC1=CC=CC=C1OC(C2CNCCO2)C3=CC=CC=C3	Aromatic ether	Antidepressant agent	Selective noradrenaline reuptake inhibitor	N - Nervous system	N06 - Psychoanaleptics	(information missing)
Rimantadine	C12H21N	CC(C12CC3CC(C1)CC(C3)C2)N	Alkylamine	Antiinfective agent (antiviral)	Viral (influenza A) nucleic acid synthesis inhibitor	J - Antiinfectives for systemic use	J05 - Antivirals for systemic use	Membrane, extracellular
Ritonavir	C37H48N6O5S2	CC(C)C1=NC(=CS1)CN(C)C(=O)NC(C(C)C)C(=O)NC(CC2=CC=CC=C2)CC(C(CC3=CC=CC=C3)NC(=O)OCC4=CN=CS4)O	1,3-thiazoles	Antiinfective agent (antiviral)	Viral (HIV) protease inhibitor	J - Antiinfectives for systemic use	J05 - Antivirals for systemic use	Membrane, cytoplasm
Rufloxacin	C17H18FN3O3S	CN1CCN(CC1)C2=C(C=C3C4=C2SCCN4C=C(C3=O)C(=O)O)F	Quinolone (antibiotic)	Antiinfective agent (antibacterial)	Bacterial topoisomerase II inhibitor	J - Antiinfectives for systemic use	J01 - Antibacterials for systemic use	(information missing)
Spectinomycin	C14H24N2O7	CC1CC(=O)C2(C(O1)OC3C(C(C(C(C3O2)NC)O)NC)O)O	Aminoglycoside (antibiotic)	Antiinfective agent (antibacterial)	Bacterial 30S ribosomal subunit inhibitor	J - Antiinfectives for systemic use	J01 - Antibacterials for systemic use	Cytoplasm
Ticarcillin	C15H16N2O6S2	CC1(C(N2C(S1)C(C2=O)NC(=O)C(C3=CSC=C3)C(=O)O)C(=O)O)C	Penicillin	Antiinfective agent (antibacterial)	Inhibitor of cross-linking of peptidoglycan during bacterial cell wall synthesis	J - Antiinfectives for systemic use	J01 - Antibacterials for systemic use	(information missing)
Tivozanib	C22H19ClN4O5	CC1=CC(=NO1)NC(=O)NC2=C(C=C(C=C2)OC3=C4C=C(C(=CC4=NC=C3)OC)OC)Cl	Aromatic ether	Antineoplastic agent	Vascular endothelial growth factor receptors inhibitor	L - Antineoplastic and immunomodulating agents	L01 - Antineoplastic agents	(information missing)
Trimethadione	C6H9NO3	CC1(C(=O)N(C(=O)O1)C)C	Oxazolidinone	Anticonvulsant agent	Inhibitor of voltage dependent T-type calcium channels	N - Nervous system	N03 - Antiepileptics	Membrane
Triprolidine	C19H22N2	CC1=CC=C(C=C1)C(=CCN2CCCC2)C3=CC=CC=N3	N-alkylpyrrolidine	Antiallergic agent	Histamine receptor antagonist	R - Respiratory system	R06 - Antihistamines for systemic use	Membrane, extracellular

## Sheet: Table S8
Drug	Interaction type	Target type	Target	Name	Function	Protein family	Protein superfamily	Cellular location	Target shared between multiple drugs
Imatinib	substrate	carrier	ABCA3	ATP-binding cassette sub-family A member 3	Transporter activity	ABC transporter superfamily	Transporter	Membrane	no
Atovaquone	inhibitor	carrier	ABCB1	Multidrug resistance protein 1	Xenobiotic-transporting atpase activity	ABC transporter superfamily	Transporter	Cell membrane	yes
Azithromycin	inhibitor, substrate	carrier	ABCB1	Multidrug resistance protein 1	Xenobiotic-transporting atpase activity	ABC transporter superfamily	Transporter	Cell membrane	yes
Fluoxetine	inhibitor	carrier	ABCB1	Multidrug resistance protein 1	Xenobiotic-transporting atpase activity	ABC transporter superfamily	Transporter	Cell membrane	yes
Imatinib	inhibitor, substrate	carrier	ABCB1	Multidrug resistance protein 1	Xenobiotic-transporting atpase activity	ABC transporter superfamily	Transporter	Cell membrane	yes
Nortriptyline	substrate	carrier	ABCB1	Multidrug resistance protein 1	Xenobiotic-transporting atpase activity	ABC transporter superfamily	Transporter	Cell membrane	yes
Reboxetine	inhibitor	carrier	ABCB1	Multidrug resistance protein 1	Xenobiotic-transporting atpase activity	ABC transporter superfamily	Transporter	Cell membrane	yes
Ritonavir	inhibitor, substrate	carrier	ABCB1	Multidrug resistance protein 1	Xenobiotic-transporting atpase activity	ABC transporter superfamily	Transporter	Cell membrane	yes
Imatinib	substrate	carrier	ABCB11	Bile salt export pump	Transporter activity	ABC transporter superfamily	Transporter	Membrane	yes
Ritonavir	inhibitor	carrier	ABCB11	Bile salt export pump	Transporter activity	ABC transporter superfamily	Transporter	Membrane	yes
Ritonavir	inhibitor, activator	carrier	ABCC1	Multidrug resistance-associated protein 1	Transporter activity	ABC transporter superfamily	Transporter	Cell membrane	no
Azithromycin	inhibitor, substrate	carrier	ABCC2	Canalicular multispecific organic anion transporter 1	Organic anion transmembrane transporter activity	ABC transporter superfamily	Transporter	Apical cell membrane	yes
Ritonavir	substrate	carrier	ABCC2	Canalicular multispecific organic anion transporter 1	Organic anion transmembrane transporter activity	ABC transporter superfamily	Transporter	Apical cell membrane	yes
Gliclazide	binder	carrier	ABCC8	ATP-binding cassette sub-family C member 8	Sulfonylurea receptor activity	ABC transporter superfamily	Transporter	Cell membrane	no
Imatinib	inhibitor, substrate	carrier	ABCG2	ATP-binding cassette sub-family G member 2	Xenobiotic-transporting atpase activity	ABC transporter superfamily	Transporter	Cell membrane	yes
Ritonavir	inhibitor	carrier	ABCG2	ATP-binding cassette sub-family G member 2	Xenobiotic-transporting atpase activity	ABC transporter superfamily	Transporter	Cell membrane	yes
Imatinib	inhibitor	enzyme	ABL1	Tyrosine-protein kinase ABL1	Syntaxin binding	Protein kinase superfamily, Tyr protein kinase family	Transferase	Cytoplasm	no
Perindopril	inhibitor	enzyme	ACE	Angiotensin-converting enzyme	Zinc ion binding	Peptidase M2 family	Hydrolase	Secreted	no
Gabapentin	activator	target	ADORA1	Adenosine receptor A1	Purine nucleoside binding	G-protein coupled receptor 1 family	G-protein coupled receptor	Cell membrane	no
Nortriptyline	inhibitor	target	ADRA1A	Alpha-1A adrenergic receptor	Protein heterodimerization activity	G-protein coupled receptor 1 family, Adrenergic receptor subfamily	G-protein coupled receptor	Nucleus membrane	no
Nortriptyline	inhibitor	target	ADRA1B	Alpha-1B adrenergic receptor	Protein heterodimerization activity	G-protein coupled receptor 1 family, Adrenergic receptor subfamily	G-protein coupled receptor	Nucleus membrane	no
Nortriptyline	inhibitor	target	ADRA1D	Alpha-1D adrenergic receptor	Alpha1-adrenergic receptor activity	G-protein coupled receptor 1 family, Adrenergic receptor subfamily	G-protein coupled receptor	Cell membrane	no
Nortriptyline	inhibitor	target	ADRA2A	Alpha-2A adrenergic receptors	Thioesterase binding	G-protein coupled receptor 1 family, Adrenergic receptor subfamily	G-protein coupled receptor	Cell membrane	no
Nortriptyline	inhibitor	target	ADRA2B	Alpha-2B adrenergic receptors	Epinephrine binding	G-protein coupled receptor 1 family, Adrenergic receptor subfamily	G-protein coupled receptor	Cell membrane	no
Nortriptyline	inhibitor	target	ADRA2C	Alpha-2C adrenergic receptors	Protein homodimerization activity	G-protein coupled receptor 1 family, Adrenergic receptor subfamily	G-protein coupled receptor	Cell membrane	no
Levobunolol	inhibitor	target	ADRB1	Beta-1 adrenergic receptor	Receptor signaling protein activity	G-protein coupled receptor 1 family, Adrenergic receptor subfamily	G-protein coupled receptor	Cell membrane	yes
Nortriptyline	inhibitor	target	ADRB1	Beta-1 adrenergic receptor	Receptor signaling protein activity	G-protein coupled receptor 1 family, Adrenergic receptor subfamily	G-protein coupled receptor	Cell membrane	yes
Levobunolol	inhibitor	target	ADRB2	Beta-2 adrenergic receptor	Protein homodimerization activity	G-protein coupled receptor 1 family, Adrenergic receptor subfamily	G-protein coupled receptor	Cell membrane	yes
Nortriptyline	inhibitor	target	ADRB2	Beta-2 adrenergic receptor	Protein homodimerization activity	G-protein coupled receptor 1 family, Adrenergic receptor subfamily	G-protein coupled receptor	Cell membrane	yes
Levobunolol	inhibitor	target	ADRB3	Beta-3 adrenergic receptor	Protein homodimerization activity	G-protein coupled receptor 1 family, Adrenergic receptor subfamily	G-protein coupled receptor	Cell membrane	yes
Nortriptyline	inhibitor	target	ADRB3	Beta-3 adrenergic receptor	Protein homodimerization activity	G-protein coupled receptor 1 family, Adrenergic receptor subfamily	G-protein coupled receptor	Cell membrane	yes
Fluoxetine	substrate	carrier	ALB	Serum albumin	Toxic substance binding	ALB/AFP/VDB family	Transporter	Secreted	yes
Imatinib	substrate	carrier	ALB	Serum albumin	Toxic substance binding	ALB/AFP/VDB family	Transporter	Secreted	yes
Nortriptyline	binder	carrier	ALB	Serum albumin	Toxic substance binding	ALB/AFP/VDB family	Transporter	Secreted	yes
Ritonavir	substrate	carrier	ALB	Serum albumin	Toxic substance binding	ALB/AFP/VDB family	Transporter	Secreted	yes
Amifostine	activator	enzyme	ALPG	Alkaline phosphatase, placental-like	Metal ion binding	Alkaline phosphatase family	Hydrolase	Cell membrane	no
Amifostine	substrate	enzyme	ALPL	Alkaline phosphatase, tissue-nonspecific isozyme	Pyrophosphatase activity	Alkaline phosphatase family	Hydrolase	Cell membrane	no
Fluoxetine	inhibitor	target	ANO1	Anoctamin-1	Voltage-gated chloride channel activity	Anoctamin family	Ion channel	Cell membrane	no
Ketoconazole	binder	target	AR	Androgen receptor	Zinc ion binding	Nuclear hormone receptor family	Nuclear hormone receptor	Nucleus	no
Gabapentin	inhibitor	enzyme	BCAT1	Branched-chain-amino-acid aminotransferase, cytosolic	L-valine transaminase activity	Class-IV pyridoxal-phosphate-dependent aminotransferase family	Transferase	Cytoplasm	no
Perindopril	inhibitor	enzyme	BCHE	Cholinesterase	Identical protein binding	Type-B carboxylesterase/lipase family	Hydrolase	Secreted	no
Imatinib	inhibitor	enzyme	BCR	Breakpoint cluster region protein	Rho guanyl-nucleotide exchange factor activity	Bcr-Abl oncoprotein family	Transferase	Cell junction	no
Gabapentin	modulator	target	CACNA1A	Voltage-dependent P/Q-type calcium channel subunit alpha-1A	Voltage-gated calcium channel activity	Calcium channel alpha-1 subunit family	Ion channel	Membrane	no
Gabapentin	inhibitor	target	CACNA1B	Voltage-dependent N-type calcium channel subunit alpha-1B	Voltage-gated calcium channel activity	Calcium channel alpha-1 subunit family	Ion channel	Membrane	no
Gabapentin	modulator	target	CACNA1C	Voltage-dependent L-type calcium channel subunit alpha-1C	Voltage-gated calcium channel activity	Calcium channel alpha-1 subunit family	Ion channel	Membrane	yes
Ibutilide	activator	target	CACNA1C	Voltage-dependent L-type calcium channel subunit alpha-1C	Voltage-gated calcium channel activity	Calcium channel alpha-1 subunit family	Ion channel	Membrane	yes
Gabapentin	modulator	target	CACNA1D	Voltage-dependent L-type calcium channel subunit alpha-1D	Voltage-gated calcium channel activity	Calcium channel alpha-1 subunit family	Ion channel	Membrane	no
Gabapentin	modulator	target	CACNA1E	Voltage-dependent R-type calcium channel subunit alpha-1E	Voltage-gated calcium channel activity	Calcium channel alpha-1 subunit family	Ion channel	Membrane	no
Gabapentin	modulator	target	CACNA1F	Voltage-dependent L-type calcium channel subunit alpha-1F	Voltage-gated calcium channel activity	Calcium channel alpha-1 subunit family	Ion channel	Membrane	no
Gabapentin	modulator	target	CACNA1G	Voltage-dependent T-type calcium channel subunit alpha-1G	Voltage-gated calcium channel activity	Calcium channel alpha-1 subunit family	Ion channel	Membrane	yes
Trimethadione	inhibitor	target	CACNA1G	Voltage-dependent T-type calcium channel subunit alpha-1G	Voltage-gated calcium channel activity	Calcium channel alpha-1 subunit family	Ion channel	Membrane	yes
Gabapentin	modulator	target	CACNA1H	Voltage-dependent T-type calcium channel subunit alpha-1H	Voltage-gated calcium channel activity	Calcium channel alpha-1 subunit family	Ion channel	Membrane	yes
Trimethadione	inhibitor	target	CACNA1H	Voltage-dependent T-type calcium channel subunit alpha-1H	Voltage-gated calcium channel activity	Calcium channel alpha-1 subunit family	Ion channel	Membrane	yes
Gabapentin	modulator	target	CACNA1I	Voltage-dependent T-type calcium channel subunit alpha-1I	Voltage-gated calcium channel activity	Calcium channel alpha-1 subunit family	Ion channel	Membrane	yes
Trimethadione	inhibitor	target	CACNA1I	Voltage-dependent T-type calcium channel subunit alpha-1I	Voltage-gated calcium channel activity	Calcium channel alpha-1 subunit family	Ion channel	Membrane	yes
Gabapentin	modulator	target	CACNA1S	Voltage-dependent L-type calcium channel subunit alpha-1S	Voltage-gated calcium channel activity	Calcium channel alpha-1 subunit family	Ion channel	Membrane	no
Gabapentin	inhibitor	target	CACNA2D1	Voltage-dependent calcium channel subunit alpha-2/delta-1	Voltage-gated calcium channel activity	Calcium channel subunit alpha-2/delta family	Ion channel	Membrane	yes
Ibutilide	activator	target	CACNA2D1	Voltage-dependent calcium channel subunit alpha-2/delta-1	Voltage-gated calcium channel activity	Calcium channel subunit alpha-2/delta family	Ion channel	Membrane	yes
Gabapentin	inhibitor	target	CACNA2D2	Voltage-dependent calcium channel subunit alpha-2/delta-2	Voltage-gated calcium channel activity	Calcium channel subunit alpha-2/delta family	Ion channel	Membrane	no
Gabapentin	modulator	target	CACNA2D3	Voltage-dependent calcium channel subunit alpha-2/delta-3	Voltage-gated calcium channel activity	Calcium channel subunit alpha-2/delta family	Ion channel	Membrane	no
Gabapentin	modulator	target	CACNA2D4	Voltage-dependent calcium channel subunit alpha-2/delta-4	Voltage-gated calcium channel activity	Calcium channel subunit alpha-2/delta family	Ion channel	Membrane	no
Gabapentin	modulator	target	CACNB1	Voltage-dependent L-type calcium channel subunit beta-1	Voltage-gated calcium channel activity	Calcium channel beta subunit family	Ion channel	Cell membrane	yes
Ibutilide	activator	target	CACNB1	Voltage-dependent L-type calcium channel subunit beta-1	Voltage-gated calcium channel activity	Calcium channel beta subunit family	Ion channel	Cell membrane	yes
Gabapentin	modulator	target	CACNB2	Voltage-dependent L-type calcium channel subunit beta-2	Voltage-gated calcium channel activity	Calcium channel beta subunit family	Ion channel	Cell membrane	no
Gabapentin	modulator	target	CACNB3	Voltage-dependent L-type calcium channel subunit beta-3	Voltage-gated calcium channel activity	Calcium channel beta subunit family	Ion channel	Apical cell membrane	no
Gabapentin	modulator	target	CACNB4	Voltage-dependent L-type calcium channel subunit beta-4	Voltage-gated calcium channel activity	Calcium channel beta subunit family	Ion channel	Membrane	no
Fluspirilene	inhibitor	target	CACNG1	Voltage-dependent calcium channel subunit gamma-1	Voltage-gated calcium channel activity	PMP-22/EMP/MP20 family	Ion channel	Membrane	yes
Gabapentin	modulator	target	CACNG1	Voltage-dependent calcium channel subunit gamma-1	Voltage-gated calcium channel activity	PMP-22/EMP/MP20 family	Ion channel	Membrane	yes
Ibutilide	activator	target	CACNG1	Voltage-dependent calcium channel subunit gamma-1	Voltage-gated calcium channel activity	PMP-22/EMP/MP20 family	Ion channel	Membrane	yes
Gabapentin	modulator	target	CACNG2	Voltage-dependent calcium channel subunit gamma-2	Voltage-gated calcium channel activity	PMP-22/EMP/MP20 family	Ion channel	Membrane	no
Gabapentin	modulator	target	CACNG3	Voltage-dependent calcium channel subunit gamma-3	Voltage-gated calcium channel activity	PMP-22/EMP/MP20 family	Ion channel	Membrane	no
Gabapentin	modulator	target	CACNG4	Voltage-dependent calcium channel subunit gamma-4	Voltage-gated calcium channel activity	PMP-22/EMP/MP20 family	Ion channel	Cell membrane	no
Gabapentin	modulator	target	CACNG5	Voltage-dependent calcium channel subunit gamma-5	Voltage-gated calcium channel activity	PMP-22/EMP/MP20 family	Ion channel	Membrane	no
Gabapentin	modulator	target	CACNG6	Voltage-dependent calcium channel subunit gamma-6	Voltage-gated calcium channel activity	PMP-22/EMP/MP20 family	Ion channel	Membrane	no
Gabapentin	modulator	target	CACNG7	Voltage-dependent calcium channel subunit gamma-7	Voltage-gated calcium channel activity	PMP-22/EMP/MP20 family	Ion channel	Membrane	no
Cinacalcet	activator	target	CASR	Extracellular calcium-sensing receptor	Phosphatidylinositol phospholipase c activity	G-protein coupled receptor 3 family	G-protein coupled receptor	Cell membrane	no
Darifenacin	inhibitor	target	CHRM1	Muscarinic acetylcholine receptor M1	Phosphatidylinositol phospholipase c activity	G-protein coupled receptor 1 family, Muscarinic acetylcholine receptor subfamily	G-protein coupled receptor	Cell membrane	yes
Diphenidol	inhibitor	target	CHRM1	Muscarinic acetylcholine receptor M1	Phosphatidylinositol phospholipase c activity	G-protein coupled receptor 1 family, Muscarinic acetylcholine receptor subfamily	G-protein coupled receptor	Cell membrane	yes
Nortriptyline	inhibitor	target	CHRM1	Muscarinic acetylcholine receptor M1	Phosphatidylinositol phospholipase c activity	G-protein coupled receptor 1 family, Muscarinic acetylcholine receptor subfamily	G-protein coupled receptor	Cell membrane	yes
Darifenacin	inhibitor	target	CHRM2	Muscarinic acetylcholine receptor M2	G-protein coupled acetylcholine receptor activity	G-protein coupled receptor 1 family, Muscarinic acetylcholine receptor subfamily	G-protein coupled receptor	Cell membrane	yes
Diphenidol	inhibitor	target	CHRM2	Muscarinic acetylcholine receptor M2	G-protein coupled acetylcholine receptor activity	G-protein coupled receptor 1 family, Muscarinic acetylcholine receptor subfamily	G-protein coupled receptor	Cell membrane	yes
Nortriptyline	inhibitor	target	CHRM2	Muscarinic acetylcholine receptor M2	G-protein coupled acetylcholine receptor activity	G-protein coupled receptor 1 family, Muscarinic acetylcholine receptor subfamily	G-protein coupled receptor	Cell membrane	yes
Darifenacin	inhibitor	target	CHRM3	Muscarinic acetylcholine receptor M3	Receptor activity	G-protein coupled receptor 1 family, Muscarinic acetylcholine receptor subfamily	G-protein coupled receptor	Cell membrane	yes
Diphenidol	inhibitor	target	CHRM3	Muscarinic acetylcholine receptor M3	Receptor activity	G-protein coupled receptor 1 family, Muscarinic acetylcholine receptor subfamily	G-protein coupled receptor	Cell membrane	yes
Nortriptyline	inhibitor	target	CHRM3	Muscarinic acetylcholine receptor M3	Receptor activity	G-protein coupled receptor 1 family, Muscarinic acetylcholine receptor subfamily	G-protein coupled receptor	Cell membrane	yes
Darifenacin	inhibitor	target	CHRM4	Muscarinic acetylcholine receptor M4	Guanyl-nucleotide exchange factor activity	G-protein coupled receptor 1 family, Muscarinic acetylcholine receptor subfamily	G-protein coupled receptor	Cell membrane	yes
Nortriptyline	inhibitor	target	CHRM4	Muscarinic acetylcholine receptor M4	Guanyl-nucleotide exchange factor activity	G-protein coupled receptor 1 family, Muscarinic acetylcholine receptor subfamily	G-protein coupled receptor	Cell membrane	yes
Darifenacin	inhibitor	target	CHRM5	Muscarinic acetylcholine receptor M5	Phosphatidylinositol phospholipase c activity	G-protein coupled receptor 1 family, Muscarinic acetylcholine receptor subfamily	G-protein coupled receptor	Cell membrane	yes
Nortriptyline	inhibitor	target	CHRM5	Muscarinic acetylcholine receptor M5	Phosphatidylinositol phospholipase c activity	G-protein coupled receptor 1 family, Muscarinic acetylcholine receptor subfamily	G-protein coupled receptor	Cell membrane	yes
Fluoxetine	inhibitor	target	CHRNA2	Neuronal acetylcholine receptor subunit alpha-2	Drug binding	Ligand-gated ion channel family, Acetylcholine receptor subfamily	Ion channel	Cell junction	no
Fluoxetine	inhibitor	target	CHRNA3	Neuronal acetylcholine receptor subunit alpha-3	Ligand-gated ion channel activity	Ligand-gated ion channel family, Acetylcholine receptor subfamily	Ion channel	Cell junction	no
Memantine	inhibitor	target	CHRNA7	Neuronal acetylcholine receptor subunit alpha-7	NA	Ligand-gated ion channel family, Acetylcholine receptor subfamily	Ion channel	Membrane	no
Fluoxetine	inhibitor	target	CHRNB4	Neuronal acetylcholine receptor subunit beta-4	Ligand-gated ion channel activity	Ligand-gated ion channel family, Acetylcholine receptor subfamily	Ion channel	Cell junction	no
Imatinib	inhibitor	enzyme	CSF1R	Macrophage colony-stimulating factor 1 receptor	Protein homodimerization activity	Protein kinase superfamily, Tyr protein kinase family	Transferase	Cell membrane	no
Ketoconazole	inhibitor	enzyme	CYP17A1	Steroid 17-alpha-hydroxylase/17,20 lyase	Steroid 17-alpha-monooxygenase activity	Cytochrome P450 family	Oxidoreductase	Membrane	no
Econazole	inhibitor	enzyme	CYP19A1	Cytochrome P450 19A1	Oxygen binding	Cytochrome P450 family	Oxidoreductase	Membrane	no
Cinacalcet	substrate	enzyme	CYP1A2	Cytochrome P450 1A2	Oxidoreductase activity	Cytochrome P450 family	Oxidoreductase	Endoplasmic reticulum membrane	yes
Fluoxetine	inhibitor, substrate	enzyme	CYP1A2	Cytochrome P450 1A2	Oxidoreductase activity	Cytochrome P450 family	Oxidoreductase	Endoplasmic reticulum membrane	yes
Imatinib	substrate	enzyme	CYP1A2	Cytochrome P450 1A2	Oxidoreductase activity	Cytochrome P450 family	Oxidoreductase	Endoplasmic reticulum membrane	yes
Nalidixic acid	inhibitor	enzyme	CYP1A2	Cytochrome P450 1A2	Oxidoreductase activity	Cytochrome P450 family	Oxidoreductase	Endoplasmic reticulum membrane	yes
Nortriptyline	substrate	enzyme	CYP1A2	Cytochrome P450 1A2	Oxidoreductase activity	Cytochrome P450 family	Oxidoreductase	Endoplasmic reticulum membrane	yes
Ritonavir	activator	enzyme	CYP1A2	Cytochrome P450 1A2	Oxidoreductase activity	Cytochrome P450 family	Oxidoreductase	Endoplasmic reticulum membrane	yes
Ketoconazole	inhibitor	enzyme	CYP21A2	Steroid 21-hydroxylase	Steroid hydroxylase activity	Cytochrome P450 family	Oxidoreductase	Endoplasmic reticulum membrane	no
Memantine	inhibitor	enzyme	CYP2A6	Cytochrome P450 2A6	Steroid hydroxylase activity	Cytochrome P450 family	Oxidoreductase	Endoplasmic reticulum membrane	no
Fluoxetine	substrate	enzyme	CYP2B6	Cytochrome P450 2B6	Steroid hydroxylase activity	Cytochrome P450 family	Oxidoreductase	Endoplasmic reticulum membrane	yes
Memantine	inhibitor	enzyme	CYP2B6	Cytochrome P450 2B6	Steroid hydroxylase activity	Cytochrome P450 family	Oxidoreductase	Endoplasmic reticulum membrane	yes
Ritonavir	inhibitor, activator	enzyme	CYP2B6	Cytochrome P450 2B6	Steroid hydroxylase activity	Cytochrome P450 family	Oxidoreductase	Endoplasmic reticulum membrane	yes
Fluoxetine	inhibitor, substrate	enzyme	CYP2C19	Cytochrome P450 2C19	Steroid hydroxylase activity	Cytochrome P450 family	Oxidoreductase	Endoplasmic reticulum membrane	yes
Gliclazide	substrate	enzyme	CYP2C19	Cytochrome P450 2C19	Steroid hydroxylase activity	Cytochrome P450 family	Oxidoreductase	Endoplasmic reticulum membrane	yes
Imatinib	substrate	enzyme	CYP2C19	Cytochrome P450 2C19	Steroid hydroxylase activity	Cytochrome P450 family	Oxidoreductase	Endoplasmic reticulum membrane	yes
Memantine	inhibitor	enzyme	CYP2C19	Cytochrome P450 2C19	Steroid hydroxylase activity	Cytochrome P450 family	Oxidoreductase	Endoplasmic reticulum membrane	yes
Nortriptyline	substrate	enzyme	CYP2C19	Cytochrome P450 2C19	Steroid hydroxylase activity	Cytochrome P450 family	Oxidoreductase	Endoplasmic reticulum membrane	yes
Ritonavir	activator	enzyme	CYP2C19	Cytochrome P450 2C19	Steroid hydroxylase activity	Cytochrome P450 family	Oxidoreductase	Endoplasmic reticulum membrane	yes
Trimethadione	substrate	enzyme	CYP2C19	Cytochrome P450 2C19	Steroid hydroxylase activity	Cytochrome P450 family	Oxidoreductase	Endoplasmic reticulum membrane	yes
Imatinib	substrate	enzyme	CYP2C8	Cytochrome P450 2C8	Steroid hydroxylase activity	Cytochrome P450 family	Oxidoreductase	Endoplasmic reticulum membrane	yes
Ritonavir	inhibitor, activator	enzyme	CYP2C8	Cytochrome P450 2C8	Steroid hydroxylase activity	Cytochrome P450 family	Oxidoreductase	Endoplasmic reticulum membrane	yes
Trimethadione	substrate	enzyme	CYP2C8	Cytochrome P450 2C8	Steroid hydroxylase activity	Cytochrome P450 family	Oxidoreductase	Endoplasmic reticulum membrane	yes
Atovaquone	inhibitor	enzyme	CYP2C9	Cytochrome P450 2C9	Steroid hydroxylase activity	Cytochrome P450 family	Oxidoreductase	Endoplasmic reticulum membrane	yes
Fluoxetine	inhibitor, substrate	enzyme	CYP2C9	Cytochrome P450 2C9	Steroid hydroxylase activity	Cytochrome P450 family	Oxidoreductase	Endoplasmic reticulum membrane	yes
Gliclazide	substrate	enzyme	CYP2C9	Cytochrome P450 2C9	Steroid hydroxylase activity	Cytochrome P450 family	Oxidoreductase	Endoplasmic reticulum membrane	yes
Imatinib	inhibitor, substrate	enzyme	CYP2C9	Cytochrome P450 2C9	Steroid hydroxylase activity	Cytochrome P450 family	Oxidoreductase	Endoplasmic reticulum membrane	yes
Ritonavir	activator	enzyme	CYP2C9	Cytochrome P450 2C9	Steroid hydroxylase activity	Cytochrome P450 family	Oxidoreductase	Endoplasmic reticulum membrane	yes
Trimethadione	substrate	enzyme	CYP2C9	Cytochrome P450 2C9	Steroid hydroxylase activity	Cytochrome P450 family	Oxidoreductase	Endoplasmic reticulum membrane	yes
Cinacalcet	inhibitor	enzyme	CYP2D6	Cytochrome P450 2D6	Steroid hydroxylase activity	Cytochrome P450 family	Oxidoreductase	Endoplasmic reticulum membrane	yes
Darifenacin	inhibitor, substrate	enzyme	CYP2D6	Cytochrome P450 2D6	Steroid hydroxylase activity	Cytochrome P450 family	Oxidoreductase	Endoplasmic reticulum membrane	yes
Fluoxetine	inhibitor, substrate	enzyme	CYP2D6	Cytochrome P450 2D6	Steroid hydroxylase activity	Cytochrome P450 family	Oxidoreductase	Endoplasmic reticulum membrane	yes
Imatinib	inhibitor, substrate	enzyme	CYP2D6	Cytochrome P450 2D6	Steroid hydroxylase activity	Cytochrome P450 family	Oxidoreductase	Endoplasmic reticulum membrane	yes
Levobunolol	substrate	enzyme	CYP2D6	Cytochrome P450 2D6	Steroid hydroxylase activity	Cytochrome P450 family	Oxidoreductase	Endoplasmic reticulum membrane	yes
Niacin	inhibitor	enzyme	CYP2D6	Cytochrome P450 2D6	Steroid hydroxylase activity	Cytochrome P450 family	Oxidoreductase	Endoplasmic reticulum membrane	yes
Nortriptyline	inhibitor, substrate	enzyme	CYP2D6	Cytochrome P450 2D6	Steroid hydroxylase activity	Cytochrome P450 family	Oxidoreductase	Endoplasmic reticulum membrane	yes
Reboxetine	inhibitor	enzyme	CYP2D6	Cytochrome P450 2D6	Steroid hydroxylase activity	Cytochrome P450 family	Oxidoreductase	Endoplasmic reticulum membrane	yes
Ritonavir	inhibitor, substrate	enzyme	CYP2D6	Cytochrome P450 2D6	Steroid hydroxylase activity	Cytochrome P450 family	Oxidoreductase	Endoplasmic reticulum membrane	yes
Econazole	inhibitor	enzyme	CYP2E1	Cytochrome P450 2E1	Steroid hydroxylase activity	Cytochrome P450 family	Oxidoreductase	Endoplasmic reticulum membrane	yes
Niacin	inhibitor	enzyme	CYP2E1	Cytochrome P450 2E1	Steroid hydroxylase activity	Cytochrome P450 family	Oxidoreductase	Endoplasmic reticulum membrane	yes
Nortriptyline	inhibitor	enzyme	CYP2E1	Cytochrome P450 2E1	Steroid hydroxylase activity	Cytochrome P450 family	Oxidoreductase	Endoplasmic reticulum membrane	yes
Trimethadione	substrate	enzyme	CYP2E1	Cytochrome P450 2E1	Steroid hydroxylase activity	Cytochrome P450 family	Oxidoreductase	Endoplasmic reticulum membrane	yes
Atovaquone	substrate	enzyme	CYP3A4	Cytochrome P450 3A4	Vitamin d3 25-hydroxylase activity	Cytochrome P450 family	Oxidoreductase	Endoplasmic reticulum membrane	yes
Azithromycin	inhibitor, substrate	enzyme	CYP3A4	Cytochrome P450 3A4	Vitamin d3 25-hydroxylase activity	Cytochrome P450 family	Oxidoreductase	Endoplasmic reticulum membrane	yes
Cinacalcet	substrate	enzyme	CYP3A4	Cytochrome P450 3A4	Vitamin d3 25-hydroxylase activity	Cytochrome P450 family	Oxidoreductase	Endoplasmic reticulum membrane	yes
Darifenacin	substrate	enzyme	CYP3A4	Cytochrome P450 3A4	Vitamin d3 25-hydroxylase activity	Cytochrome P450 family	Oxidoreductase	Endoplasmic reticulum membrane	yes
Econazole	inhibitor	enzyme	CYP3A4	Cytochrome P450 3A4	Vitamin d3 25-hydroxylase activity	Cytochrome P450 family	Oxidoreductase	Endoplasmic reticulum membrane	yes
Fluoxetine	inhibitor, substrate	enzyme	CYP3A4	Cytochrome P450 3A4	Vitamin d3 25-hydroxylase activity	Cytochrome P450 family	Oxidoreductase	Endoplasmic reticulum membrane	yes
Imatinib	inhibitor, substrate	enzyme	CYP3A4	Cytochrome P450 3A4	Vitamin d3 25-hydroxylase activity	Cytochrome P450 family	Oxidoreductase	Endoplasmic reticulum membrane	yes
Niacin	inhibitor	enzyme	CYP3A4	Cytochrome P450 3A4	Vitamin d3 25-hydroxylase activity	Cytochrome P450 family	Oxidoreductase	Endoplasmic reticulum membrane	yes
Nortriptyline	substrate	enzyme	CYP3A4	Cytochrome P450 3A4	Vitamin d3 25-hydroxylase activity	Cytochrome P450 family	Oxidoreductase	Endoplasmic reticulum membrane	yes
Reboxetine	inhibitor, substrate	enzyme	CYP3A4	Cytochrome P450 3A4	Vitamin d3 25-hydroxylase activity	Cytochrome P450 family	Oxidoreductase	Endoplasmic reticulum membrane	yes
Ritonavir	inhibitor, substrate	enzyme	CYP3A4	Cytochrome P450 3A4	Vitamin d3 25-hydroxylase activity	Cytochrome P450 family	Oxidoreductase	Endoplasmic reticulum membrane	yes
Trimethadione	substrate	enzyme	CYP3A4	Cytochrome P450 3A4	Vitamin d3 25-hydroxylase activity	Cytochrome P450 family	Oxidoreductase	Endoplasmic reticulum membrane	yes
Fluoxetine	substrate	enzyme	CYP3A5	Cytochrome P450 3A5	Oxygen binding	Cytochrome P450 family	Oxidoreductase	Endoplasmic reticulum membrane	yes
Imatinib	inhibitor, substrate	enzyme	CYP3A5	Cytochrome P450 3A5	Oxygen binding	Cytochrome P450 family	Oxidoreductase	Endoplasmic reticulum membrane	yes
Nortriptyline	substrate	enzyme	CYP3A5	Cytochrome P450 3A5	Oxygen binding	Cytochrome P450 family	Oxidoreductase	Endoplasmic reticulum membrane	yes
Ritonavir	inhibitor, substrate	enzyme	CYP3A5	Cytochrome P450 3A5	Oxygen binding	Cytochrome P450 family	Oxidoreductase	Endoplasmic reticulum membrane	yes
Imatinib	inhibitor, substrate	enzyme	CYP3A7	Cytochrome P450 3A7	Oxygen binding	Cytochrome P450 family	Oxidoreductase	Endoplasmic reticulum membrane	yes
Ritonavir	inhibitor, substrate	enzyme	CYP3A7	Cytochrome P450 3A7	Oxygen binding	Cytochrome P450 family	Oxidoreductase	Endoplasmic reticulum membrane	yes
Itraconazole	inhibitor	enzyme	CYP51A1	Lanosterol 14-alpha demethylase	Sterol 14-demethylase activity	Cytochrome P450 family	Oxidoreductase	Endoplasmic reticulum membrane	no
Imatinib	inhibitor	enzyme	DDR1	Epithelial discoidin domain-containing receptor 1	Transmembrane receptor protein tyrosine kinase activity	Protein kinase superfamily, Tyr protein kinase family	Transferase	Cell membrane	no
Imatinib	inhibitor	enzyme	DDR2	Epithelial discoidin domain-containing receptor 2	Transmembrane receptor protein tyrosine kinase activity	Protein kinase superfamily, Tyr protein kinase family	Transferase	Cell membrane	no
Atovaquone	inhibitor	enzyme	DHODH	Dihydroorotate dehydrogenase (quinone), mitochondrial	Dihydroorotate dehydrogenase activity	Dihydroorotate dehydrogenase family	Oxidoreductase	Mitochondrion inner membrane	no
Fluspirilene	inhibitor	target	DRD2	Dopamine D2 receptor	Potassium channel regulator activity	G-protein coupled receptor 1 family	G-protein coupled receptor	Cell membrane	yes
Memantine	inhibitor, activator	target	DRD2	Dopamine D2 receptor	Potassium channel regulator activity	G-protein coupled receptor 1 family	G-protein coupled receptor	Cell membrane	yes
Nortriptyline	inhibitor	target	DRD2	Dopamine D2 receptor	Potassium channel regulator activity	G-protein coupled receptor 1 family	G-protein coupled receptor	Cell membrane	yes
Tivozanib	inhibitor	enzyme	FLT1	Vascular endothelial growth factor receptor 1	VEGF-B-activated receptor activity	Protein kinase superfamily, Tyr protein kinase family	Transferase	Cell membrane	no
Tivozanib	inhibitor	enzyme	FLT4	Vascular endothelial growth factor receptor 3	Vascular endothelial growth factor-activated receptor activity	Protein kinase superfamily, Tyr protein kinase family	Transferase	Cell membrane	no
Memantine	binder	target	GABRA1	Gamma-aminobutyric acid receptor subunit alpha-1	Inhibitory extracellular ligand-gated ion channel activity	Ligand-gated ion channel family, Gamma-aminobutyric acid receptor subfamily	Ion channel	Cell junction	no
Memantine	binder	target	GABRA2	Gamma-aminobutyric acid receptor subunit alpha-2	Inhibitory extracellular ligand-gated ion channel activity	Ligand-gated ion channel family, Gamma-aminobutyric acid receptor subfamily	Ion channel	Cell junction	no
Memantine	binder	target	GABRA3	Gamma-aminobutyric acid receptor subunit alpha-3	Inhibitory extracellular ligand-gated ion channel activity	Ligand-gated ion channel family, Gamma-aminobutyric acid receptor subfamily	Ion channel	Cell junction	no
Memantine	binder	target	GABRA4	Gamma-aminobutyric acid receptor subunit alpha-4	Inhibitory extracellular ligand-gated ion channel activity	Ligand-gated ion channel family, Gamma-aminobutyric acid receptor subfamily	Ion channel	Cell junction	no
Memantine	binder	target	GABRA5	Gamma-aminobutyric acid receptor subunit alpha-5	Transporter activity	Ligand-gated ion channel family, Gamma-aminobutyric acid receptor subfamily	Ion channel	Cell junction	no
Memantine	binder	target	GABRA6	Gamma-aminobutyric acid receptor subunit alpha-6	Inhibitory extracellular ligand-gated ion channel activity	Ligand-gated ion channel family, Gamma-aminobutyric acid receptor subfamily	Ion channel	Cell junction	no
Memantine	binder	target	GABRB1	Gamma-aminobutyric acid receptor subunit beta-1	Ligand-gated ion channel activity	Ligand-gated ion channel family, Gamma-aminobutyric acid receptor subfamily	Ion channel	Cell junction	no
Memantine	binder	target	GABRB2	Gamma-aminobutyric acid receptor subunit beta-2	Inhibitory extracellular ligand-gated ion channel activity	Ligand-gated ion channel family, Gamma-aminobutyric acid receptor subfamily	Ion channel	Cell junction	no
Memantine	binder	target	GABRB3	Gamma-aminobutyric acid receptor subunit beta-3	Gaba-gated chloride ion channel activity	Ligand-gated ion channel family, Gamma-aminobutyric acid receptor subfamily	Ion channel	Cell junction	no
Memantine	binder	target	GABRD	Gamma-aminobutyric acid receptor subunit delta	Gaba-a receptor activity	Ligand-gated ion channel family, Gamma-aminobutyric acid receptor subfamily	Ion channel	Cell junction	no
Memantine	binder	target	GABRE	Gamma-aminobutyric acid receptor subunit epsilon	Inhibitory extracellular ligand-gated ion channel activity	Ligand-gated ion channel family, Gamma-aminobutyric acid receptor subfamily	Ion channel	Cell junction	no
Memantine	binder	target	GABRG1	Gamma-aminobutyric acid receptor subunit gamma-1	Inhibitory extracellular ligand-gated ion channel activity	Ligand-gated ion channel family, Gamma-aminobutyric acid receptor subfamily	Ion channel	Cell junction	no
Memantine	binder	target	GABRG2	Gamma-aminobutyric acid receptor subunit gamma-2	Inhibitory extracellular ligand-gated ion channel activity	Ligand-gated ion channel family, Gamma-aminobutyric acid receptor subfamily	Ion channel	Cell junction	no
Memantine	binder	target	GABRG3	Gamma-aminobutyric acid receptor subunit gamma-3	Inhibitory extracellular ligand-gated ion channel activity	Ligand-gated ion channel family, Gamma-aminobutyric acid receptor subfamily	Ion channel	Cell junction	no
Memantine	binder	target	GABRP	Gamma-aminobutyric acid receptor subunit pi	Gaba-a receptor activity	Ligand-gated ion channel family, Gamma-aminobutyric acid receptor subfamily	Ion channel	Cell junction	no
Memantine	binder	target	GABRQ	Gamma-aminobutyric acid receptor subunit theta	Transmembrane signaling receptor activity	Ligand-gated ion channel family, Gamma-aminobutyric acid receptor subfamily	Ion channel	Cell junction	no
Memantine	inhibitor	target	GLRA1	Glycine receptor subunit alpha-1	Transmitter-gated ion channel activity	Ligand-gated ion channel family, Glycine receptor subfamily	Ion channel	Cell junction	no
Memantine	inhibitor	target	GLRA2	Glycine receptor subunit alpha-2	Transmitter-gated ion channel activity	Ligand-gated ion channel family, Glycine receptor subfamily	Ion channel	Cell junction	no
Memantine	inhibitor	target	GLRA3	Glycine receptor subunit alpha-3	Transmitter-gated ion channel activity	Ligand-gated ion channel family, Glycine receptor subfamily	Ion channel	Cell junction	no
Memantine	inhibitor	target	GLRB	Glycine receptor subunit beta	Glycine binding	Ligand-gated ion channel family, Glycine receptor subfamily	Ion channel	Cell junction	no
Memantine	inhibitor	target	GRIN1	Glutamate receptor ionotropic, NMDA 1	Voltage-gated cation channel activity	Glutamate-gated ion channel family	Ion channel	Cell membrane	no
Memantine	inhibitor	target	GRIN2A	Glutamate receptor ionotropic, NMDA 2A	Zinc ion binding	Glutamate-gated ion channel family	Ion channel	Cell membrane	no
Memantine	inhibitor	target	GRIN2B	Glutamate receptor ionotropic, NMDA 2B	Zinc ion binding	Glutamate-gated ion channel family	Ion channel	Cell membrane	no
Memantine	inhibitor	target	GRIN2C	Glutamate receptor ionotropic, NMDA 2C	Nmda glutamate receptor activity	Glutamate-gated ion channel family	Ion channel	Cell membrane	no
Memantine	inhibitor	target	GRIN2D	Glutamate receptor ionotropic, NMDA 2D	Nmda glutamate receptor activity	Glutamate-gated ion channel family	Ion channel	Cell membrane	no
Memantine	inhibitor	target	GRIN3A	Glutamate receptor ionotropic, NMDA 3A	Protein phosphatase 2a binding	Glutamate-gated ion channel family	Ion channel	Cell membrane	no
Memantine	inhibitor	target	GRIN3B	Glutamate receptor ionotropic, NMDA 3B	Nmda glutamate receptor activity	Glutamate-gated ion channel family	Ion channel	Cell membrane	no
Niacin	activator	target	HCAR2	Hydroxycarboxylic acid receptor 2	Nicotinic acid receptor activity	G-protein coupled receptor 1 family	G-protein coupled receptor	Cell membrane	no
Niacin	activator	target	HCAR3	Hydroxycarboxylic acid receptor 3	G-protein coupled receptor activity	G-protein coupled receptor 1 family	G-protein coupled receptor	Cell membrane	no
Alimemazine	inhibitor	target	HRH1	Histamine H1 receptor	Histamine receptor activity	G-protein coupled receptor 1 family	G-protein coupled receptor	Cell membrane	yes
Fluspirilene	inhibitor	target	HRH1	Histamine H1 receptor	Histamine receptor activity	G-protein coupled receptor 1 family	G-protein coupled receptor	Cell membrane	yes
Nortriptyline	inhibitor	target	HRH1	Histamine H1 receptor	Histamine receptor activity	G-protein coupled receptor 1 family	G-protein coupled receptor	Cell membrane	yes
Triprolidine	inhibitor	target	HRH1	Histamine H1 receptor	Histamine receptor activity	G-protein coupled receptor 1 family	G-protein coupled receptor	Cell membrane	yes
Fluspirilene	inhibitor	target	HTR1A	5-hydroxytryptamine receptor 1A	Serotonin receptor activity	G-protein coupled receptor 1 family, 5-hydroxytryptamine receptor subfamily	G-protein coupled receptor	Cell membrane	yes
Nortriptyline	inhibitor	target	HTR1A	5-hydroxytryptamine receptor 1A	Serotonin receptor activity	G-protein coupled receptor 1 family, 5-hydroxytryptamine receptor subfamily	G-protein coupled receptor	Cell membrane	yes
Fluspirilene	inhibitor	target	HTR1D	5-hydroxytryptamine receptor 1D	Serotonin receptor activity	G-protein coupled receptor 1 family	G-protein coupled receptor	Cell membrane	no
Fluspirilene	inhibitor	target	HTR1E	5-hydroxytryptamine receptor 1E	Serotonin receptor activity	G-protein coupled receptor 1 family	G-protein coupled receptor	Cell membrane	no
Fluspirilene	inhibitor	target	HTR2A	5-hydroxytryptamine receptor 2A	Virus receptor activity	G-protein coupled receptor 1 family	G-protein coupled receptor	Cell membrane	yes
Nortriptyline	inhibitor	target	HTR2A	5-hydroxytryptamine receptor 2A	Virus receptor activity	G-protein coupled receptor 1 family	G-protein coupled receptor	Cell membrane	yes
Fluoxetine	inhibitor	target	HTR2B	5-hydroxytryptamine receptor 2B	Serotonin receptor activity	G-protein coupled receptor 1 family	G-protein coupled receptor	Cell membrane	no
Fluoxetine	inhibitor	target	HTR2C	5-hydroxytryptamine receptor 2C	Serotonin receptor activity	G-protein coupled receptor 1 family	G-protein coupled receptor	Cell membrane	yes
Nortriptyline	inhibitor	target	HTR2C	5-hydroxytryptamine receptor 2C	Serotonin receptor activity	G-protein coupled receptor 1 family	G-protein coupled receptor	Cell membrane	yes
Memantine	inhibitor	target	HTR3A	5-hydroxytryptamine receptor 3A	Voltage-gated potassium channel activity	Ligand-gated ion channel family, 5-hydroxytryptamine receptor subfamily	Ion channel	Cell junction	no
Fluoxetine	inhibitor	target	KCNH2	Potassium voltage-gated channel subfamily H member 2	Voltage-gated potassium channel activity involved in ventricular cardiac muscle cell action potential repolarization	Potassium channel family	Ion channel	Cell membrane	yes
Ibutilide	inhibitor	target	KCNH2	Potassium voltage-gated channel subfamily H member 2	Voltage-gated potassium channel activity involved in ventricular cardiac muscle cell action potential repolarization	Potassium channel family	Ion channel	Cell membrane	yes
Ketoconazole	inhibitor	target	KCNH2	Potassium voltage-gated channel subfamily H member 2	Voltage-gated potassium channel activity involved in ventricular cardiac muscle cell action potential repolarization	Potassium channel family	Ion channel	Cell membrane	yes
Ibutilide	inhibitor	target	KCNH6	Potassium voltage-gated channel subfamily H member 6	Voltage-gated potassium channel activity	Potassium channel family	Ion channel	Membrane	no
Ibutilide	inhibitor	target	KCNH7	Potassium voltage-gated channel subfamily H member 7	Voltage-gated potassium channel activity	Potassium channel family	Ion channel	Membrane	no
Nortriptyline	inhibitor	target	KCNJ10	ATP-sensitive inward rectifier potassium channel 10	ATP binding	Inward rectifier-type potassium channel family	Ion channel	Membrane	no
Ibutilide	inhibitor	target	KCNJ11	ATP-sensitive inward rectifier potassium channel 11	Voltage-gated potassium channel activity	Inward rectifier-type potassium channel family	Ion channel	Membrane	no
Ibutilide	inhibitor	target	KCNK1	Potassium channel subfamily K member 1	Sodium channel activity	Two pore domain potassium channel family	Ion channel	Cell membrane	no
Ibutilide	inhibitor	target	KCNK6	Potassium channel subfamily K member 6	Potassium ion leak channel activity	Two pore domain potassium channel family	Ion channel	Membrane	no
Gabapentin	activator	target	KCNQ3	Potassium voltage-gated channel subfamily KQT member 3	Voltage-gated potassium channel activity	Potassium channel family	Ion channel	Membrane	no
Gabapentin	activator	target	KCNQ5	Potassium voltage-gated channel subfamily KQT member 5	Voltage-gated potassium channel activity	Potassium channel family	Ion channel	Membrane	no
Tivozanib	inhibitor	enzyme	KDR	Vascular endothelial growth factor receptor 2	Vascular endothelial growth factor-activated receptor activity	Protein kinase superfamily, Tyr protein kinase family	Transferase	Cell junction	no
Imatinib	inhibitor	enzyme	KIT	Mast/stem cell growth factor receptor Kit	Transmembrane receptor protein tyrosine kinase activity	Protein kinase superfamily, Tyr protein kinase family	Transferase	Cell membrane	no
Azithromycin	activator	target	MLNR	Motilin receptor	Growth hormone-releasing hormone receptor activity	G-protein coupled receptor 1 family	G-protein coupled receptor	Cell membrane	no
Clebopride	NA	NA	NA	NA	NA	NA	NA	NA	NA
Etamsylate	NA	NA	NA	NA	NA	NA	NA	NA	NA
Iopamidol	NA	NA	NA	NA	NA	NA	NA	NA	NA
Lonidamine	NA	NA	NA	NA	NA	NA	NA	NA	NA
Rimantadine	NA	NA	NA	NA	NA	NA	NA	NA	NA
Rufloxacin	NA	NA	NA	NA	NA	NA	NA	NA	NA
Spectinomycin	NA	NA	NA	NA	NA	NA	NA	NA	NA
Ticarcillin	NA	NA	NA	NA	NA	NA	NA	NA	NA
Niacin	binder	enzyme	NNMT	Nicotinamide N-methyltransferase	Nicotinamide n-methyltransferase activity	NNMT/PNMT/TEMT family	Transferase	Cytoplasm	no
Econazole	activator	target	NR1I2	Nuclear receptor subfamily 1 group I member 2	Zinc ion binding	Nuclear hormone receptor family	Nuclear hormone receptor	Nucleus	yes
Ritonavir	activator	target	NR1I2	Nuclear receptor subfamily 1 group I member 2	Zinc ion binding	Nuclear hormone receptor family	Nuclear hormone receptor	Nucleus	yes
Ketoconazole	inhibitor	target	NR1I2	Nuclear receptor subfamily 1 group I member 2	Zinc ion binding	Nuclear hormone receptor family	Nuclear hormone receptor	Nucleus	yes
Imatinib	inhibitor	enzyme	NTRK1	High affinity nerve growth factor receptor	Transmembrane receptor protein tyrosine kinase activity	Protein kinase superfamily, Tyr protein kinase family	Transferase	Cell membrane	no
Fluoxetine	substrate	carrier	ORM1	Alpha-1-acid glycoprotein 1	Transporter activity	Lipocalin family	Transporter	Secreted	yes
Imatinib	substrate	carrier	ORM1	Alpha-1-acid glycoprotein 1	Transporter activity	Lipocalin family	Transporter	Secreted	yes
Nortriptyline	binder	carrier	ORM1	Alpha-1-acid glycoprotein 1	Transporter activity	Lipocalin family	Transporter	Secreted	yes
Ritonavir	substrate	carrier	ORM1	Alpha-1-acid glycoprotein 1	Transporter activity	Lipocalin family	Transporter	Secreted	yes
Azithromycin	inhibitor	enzyme	PADI4	Protein-arginine deiminase type-4	Protein-arginine deiminase activity	Protein arginine deiminase family	Hydrolase	Cytoplasm	no
Imatinib	inhibitor	enzyme	PDGFRA	Platelet-derived growth factor receptor alpha	Vascular endothelial growth factor-activated receptor activity	Protein kinase superfamily, Tyr protein kinase family	Transferase	Cell membrane	no
Imatinib	inhibitor	enzyme	PDGFRB	Platelet-derived growth factor receptor beta	Vascular endothelial growth factor binding	Protein kinase superfamily, Tyr protein kinase family	Transferase	Cell membrane	no
Nortriptyline	binder	enzyme	PGRMC1	Progesterone receptor membrane component 1	Steroid binding	Cytochrome B5 family	Oxidoreductase	Microsome membrane	no
Imatinib	substrate	enzyme	PTGS1	Prostaglandin G/H synthase 1	Prostaglandin-endoperoxide synthase activity	Prostaglandin G/H synthase family	Oxidoreductase	Microsome membrane	no
Niacin	binder	enzyme	QPRT	Nicotinate-nucleotide pyrophosphorylase [carboxylating]	Protein homodimerization activity	NadC/ModD family	Transferase	Cytoplasm	no
Imatinib	inhibitor	enzyme	RET	Proto-oncogene tyrosine-protein kinase receptor Ret	NA	Protein kinase superfamily, Tyr protein kinase family	Transferase	NA	no
Niacin	inhibitor	target	SERPINA7	Thyroxine-binding globulin	Serine-type endopeptidase inhibitor activity	Serpin family	Protease inhibitor	Secreted	no
Perindopril	inhibitor	target	SFRP4	Secreted frizzled-related protein 4	Modulator of Wnt signaling through direct interaction with Wnts	Secreted frizzled-related protein (sFRP) family	G-protein coupled receptor	Secreted	no
Nortriptyline	binder	target	SIGMAR1	Sigma non-opioid intracellular receptor 1	Opioid receptor activity	ERG2 family	Ion channel	Nucleus inner membrane	no
Metolazone	inhibitor	carrier	SLC12A3	Solute carrier family 12 member 3	Transporter activity	SLC12A transporter family	Transporter	Cell membrane	no
Perindopril	substrate	carrier	SLC15A1	Solute carrier family 15 member 1	Proton-dependent oligopeptide secondary active transmembrane transporter activity	Proton-dependent oligopeptide transporter family	Transporter	Membrane	no
Perindopril	substrate	carrier	SLC15A2	Solute carrier family 15 member 2	Peptide:proton symporter activity	Proton-dependent oligopeptide transporter family	Transporter	Membrane	no
Niacin	substrate	carrier	SLC16A1	Monocarboxylate transporter 1	Symporter activity	Monocarboxylate porter family	Transporter	Cell membrane	no
Imatinib	substrate	carrier	SLC22A1	Solute carrier family 22 member 1	Secondary active organic cation transmembrane transporter activity	Organic cation transporterfamily	Transporter	Basolateral cell membrane	no
Imatinib	inhibitor	carrier	SLC22A2	Solute carrier family 22 member 2	Quaternary ammonium group transmembrane transporter activity	Organic cation transporterfamily	Transporter	Membrane	yes
Memantine	substrate	carrier	SLC22A2	Solute carrier family 22 member 2	Quaternary ammonium group transmembrane transporter activity	Organic cation transporterfamily	Transporter	Membrane	yes
Niacin	inhibitor	carrier	SLC22A5	Solute carrier family 22 member 5	Symporter activity	Organic cation transporterfamily	Transporter	Membrane	no
Nalidixic acid	inhibitor	carrier	SLC22A6	Solute carrier family 22 member 6	Sodium-independent organic anion transmembrane transporter activity	Organic cation transporterfamily	Transporter	Cell membrane	no
Dilazep	inhibitor	carrier	SLC29A1	Solute carrier family 29 member 1	Nucleoside transmembrane transporter activity	SLC29A/ENT transporter family	Transporter	Basolateral cell membrane	no
Fluoxetine	inhibitor	carrier	SLC29A4	Solute carrier family 29 member 4	Nucleoside transmembrane transporter activity	SLC29A/ENT transporter family	Transporter	Cell membrane	no
Nortriptyline	inhibitor	carrier	SLC6A2	Sodium-dependent noradrenaline transporter	Norepinephrine:sodium symporter activity	Sodium:neurotransmitter symporter family	Transporter	Membrane	yes
Reboxetine	inhibitor	carrier	SLC6A2	Sodium-dependent noradrenaline transporter	Norepinephrine:sodium symporter activity	Sodium:neurotransmitter symporter family	Transporter	Membrane	yes
Fluoxetine	inhibitor	carrier	SLC6A4	Sodium-dependent serotonin transporter	Serotonin:sodium symporter activity	Sodium:neurotransmitter symporter family	Transporter	Cell membrane	yes
Nortriptyline	inhibitor	carrier	SLC6A4	Sodium-dependent serotonin transporter	Serotonin:sodium symporter activity	Sodium:neurotransmitter symporter family	Transporter	Cell membrane	yes
Gabapentin	substrate	carrier	SLC7A5	Large neutral amino acids transporter small subunit 1	Peptide antigen binding	L-type amino acid transporter family	Transporter	Cytoplasm	no
Ritonavir	inhibitor	carrier	SLCO1A2	Solute carrier organic anion transporter family member 1A2	Sodium-independent organic anion transmembrane transporter activity	Organo anion transporter family	Transporter	Cell membrane	no
Ritonavir	inhibitor	carrier	SLCO1B1	Solute carrier organic anion transporter family member 1B1	Sodium-independent organic anion transmembrane transporter activity	Organo anion transporter family	Transporter	Basolateral cell membrane	no
Ritonavir	inhibitor	carrier	SLCO1B3	Solute carrier organic anion transporter family member 1B3	Sodium-independent organic anion transmembrane transporter activity	Organo anion transporter family	Transporter	Basolateral cell membrane	no
Niacin	inhibitor	carrier	SLCO2B1	Solute carrier organic anion transporter family member 2B1	Sodium-independent organic anion transmembrane transporter activity	Organo anion transporter family	Transporter	Cell membrane	yes
Ritonavir	inhibitor	carrier	SLCO2B1	Solute carrier organic anion transporter family member 2B1	Sodium-independent organic anion transmembrane transporter activity	Organo anion transporter family	Transporter	Cell membrane	yes
Nalidixic acid	inhibitor	enzyme	TDO2	Tryptophan 2,3-dioxygenase	Tryptophan 2,3-dioxygenase activity	Tryptophan 2,3-dioxygenase family	Oxidoreductase	Cytoplasm	no
Econazole	inhibitor	target	TRPM2	Transient receptor potential cation channel subfamily M member 2	Calcium channel activity	Transient receptor family	Ion channel	Apical cell membrane	no
Econazole	inhibitor	target	TRPV5	Transient receptor potential cation channel subfamily V member 5	Calcium channel activity	Transient receptor family	Ion channel	Apical cell membrane	no
Ritonavir	activator	enzyme	UGT1A1	UDP-glucuronosyltransferase 1A1	Steroid binding	UDP-glycosyltransferase family	Transferase	Microsome	no
Ritonavir	activator	enzyme	UGT1A10	UDP-glucuronosyltransferase 1A10	Protein kinase c binding	UDP-glycosyltransferase family	Transferase	Microsome	no
Ritonavir	activator	enzyme	UGT1A3	UDP-glucuronosyltransferase 1A3	Retinoic acid binding	UDP-glycosyltransferase family	Transferase	Microsome	no
Ritonavir	activator	enzyme	UGT1A4	UDP-glucuronosyltransferase 1A4	Protein homodimerization activity	UDP-glycosyltransferase family	Transferase	Microsome	no
Ritonavir	activator	enzyme	UGT1A6	UDP-glucuronosyltransferase 1A6	Protein homodimerization activity	UDP-glycosyltransferase family	Transferase	Microsome	no
Ritonavir	activator	enzyme	UGT1A7	UDP-glucuronosyltransferase 1A7	Retinoic acid binding	UDP-glycosyltransferase family	Transferase	Microsome	no
Ritonavir	activator	enzyme	UGT1A8	UDP-glucuronosyltransferase 1A8	Steroid binding	UDP-glycosyltransferase family	Transferase	Microsome	no
Ritonavir	activator	enzyme	UGT1A9	UDP-glucuronosyltransferase 1A9	Retinoic acid binding	UDP-glycosyltransferase family	Transferase	Microsome	no
Ritonavir	activator	enzyme	UGT2B15	UDP-glucuronosyltransferase 2B15	Glucuronosyltransferase activity	UDP-glycosyltransferase family	Transferase	Microsome membrane	no
Ritonavir	activator	enzyme	UGT2B4	UDP-glucuronosyltransferase 2B4	Glucuronosyltransferase activity	UDP-glycosyltransferase family	Transferase	Microsome membrane	no
Ritonavir	activator	enzyme	UGT2B7	UDP-glucuronosyltransferase 2B7	Glucuronosyltransferase activity	UDP-glycosyltransferase family	Transferase	Microsome membrane	no

## Sheet: Table S9
Drug	Dominant species @ pH 7.4	MW	logP	logD	FrRotB	logPeff	logSw	T_Dipole	TPSA	RelPSA	hum_fup	RBP	Vd
Alimemazine	Cation	298.453	4.70696	2.92574	4	-3.3078	-3.83689	0.741835	6.48	0.1049	8.88522	0.85183	6.44622
Amifostine	Zwitter	214.225	-3.03819	-3.00914	7	-4.57753	-0.664206	2.14866	95.58	0.55965	91.4959	1.32627	0.403323
Atovaquone	Anion	366.843	4.78567	3.1922	2	-3.1561	-6.26204	2.1332	51.21	0.14715	3.36916	0.672523	0.750719
Azithromycin	Cation	748.992	3.38685	1.63283	7	-4.56975	-2.6361	2.92635	180.08	0.25902	47.456	0.941677	3.01577
Cinacalcet	Cation	357.418	5.7103	4.4307	7	-3.40198	-4.8655	1.69861	12.03	0.041736	5.75959	0.823504	13.4879
Clebopride	Cation	373.883	3.59182	3.03369	5	-3.76868	-3.40265	2.59381	67.59	0.18609	9.50617	0.942213	2.9636
Darifenacin	Cation	426.558	4.7273	3.62704	7	-3.71107	-4.11138	1.62678	55.56	0.12624	5.39863	0.783375	3.72931
Dilazep	Cation	604.694	3.18486	2.59192	16	-3.96123	-3.26062	2.07089	114.46	0.23553	17.0955	0.65551	2.56351
Diphenidol	Cation	309.451	3.92691	1.91259	6	-3.41506	-3.16087	0.612261	23.47	0.064872	18.6109	0.851117	5.76824
Econazole	Unionised	381.689	5.26442	5.22331	6	-3.0729	-4.2151	1.34895	27.05	0.1005	3.14724	0.718226	1.87412
Etamsylate	Anion	263.313	-0.912491	-2.69205	1	-3.70167	-0.180385	1.73604	94.83	0.5615	56.6942	0.964469	0.194816
Fluoxetine	Cation	309.33	4.38815	2.02511	7	-3.56747	-3.1351	2.20979	21.26	0.090848	15.8901	0.8825	10.6618
Fluspirilene	Cation	475.581	5.58925	4.87423	7	-3.48504	-4.65316	1.72738	35.58	0.087467	4.73727	0.716282	6.53516
Gabapentin	Zwitter	171.239	-1.28419	-1.28486	3	-4.14771	-0.982915	0.857876	63.32	0.29717	87.8545	1.39573	0.529448
Gliclazide	Anion	323.416	1.32024	0.908812	5	-4.33576	-3.63487	4.30254	78.51	0.29366	12.2448	0.844825	0.284931
Ibutilide	Zwitter	384.583	3.44697	2.05954	14	-4.59164	-3.47172	5.13877	69.64	0.17893	22.1859	0.977906	1.15021
Imatinib	Cation	493.613	4.15331	3.29101	6	-3.98066	-3.9222	2.64	86.28	0.19484	6.4129	0.703928	5.87029
Iopamidol	Unionised	777.075	-2.46141	-2.46154	11	-4.72318	-1.41954	1.88171	188.45	0.36941	85.4596	0.677632	0.569831
Itraconazole	Unionised	705.645	4.89324	4.8926	10	-3.73211	-4.98358	4.45276	104.7	0.19006	2.74957	0.665475	2.72675
Ketoconazole	Unionised	531.438	3.73556	3.71178	8	-3.47071	-3.69643	2.66474	69.06	0.17684	4.38126	0.684249	1.72432
Levobunolol	Cation	291.39	2.39305	0.340561	6	-3.79636	-2.16243	1.52042	58.56	0.20358	54.8036	0.954729	3.12475
Lonidamine	Anion	321.162	4.64752	1.21977	2	-3.01506	-3.75333	1.41035	55.12	0.19609	3.64969	0.692612	0.22662
Memantine	Cation	179.306	3.47861	0.851384	0	-3.42537	-1.52019	0.338415	26.02	0.11539	53.2564	1.41581	3.24964
Metolazone	Unionised	365.84	2.2563	2.25495	2	-4.10631	-4.29046	3.97141	92.5	0.28925	10.4195	0.981389	0.652978
Nalidixic acid	Anion	232.238	1.11076	-0.725343	1	-3.54643	-3.13833	2.3189	72.19	0.30922	24.6891	0.787269	0.222087
Niacin	Zwitter	123.111	0.269052	-1.50739	0	-4.05408	-1.47831	1.0071	50.19	0.38608	34.0105	1.21211	0.243021
Nortriptyline	Cation	263.383	4.45794	2.21361	3	-3.29955	-3.28301	0.184148	12.03	0.051392	11.6539	0.928385	4.95869
Perindopril	Zwitter	368.472	0.854634	-0.340058	10	-4.29448	-1.93765	2.05514	95.94	0.26889	17.1925	0.75107	0.263485
Reboxetine	Cation	313.396	2.97847	2.37687	6	-3.44292	-2.10145	0.745269	39.72	0.16369	16.2362	0.80883	2.4094
Rimantadine	Cation	179.306	3.08315	0.820246	1	-3.42396	-1.74419	0.33696	26.02	0.11166	63.5986	1.36318	3.43408
Ritonavir	Unionised	720.957	4.20455	4.20402	22	-4.32897	-4.90219	3.54572	145.78	0.29005	3.67247	0.642181	1.03473
Rufloxacin	Zwitter	363.412	0.0642165	-0.010512	1	-4.21331	-4.07684	3.40283	65.78	0.27049	34.8839	1.14812	1.64893
Spectinomycin	Cation	332.352	-1.86759	-2.78303	2	-4.46994	-0.235975	1.42914	129.51	0.4706	96.2217	1.1405	0.525324
Ticarcillin	Anion	384.432	0.455075	-2.92483	6	-4.14167	-2.08876	2.75491	124.01	0.52471	32.0278	0.686934	0.173751
Tivozanib	Unionised	454.869	4.56457	4.56168	8	-3.73643	-5.28767	2.47784	107.74	0.30229	3.8809	0.682816	0.815217
Trimethadione	Unionised	143.141	-0.031042	-0.031042	0	-3.36373	-0.438337	1.27859	46.61	0.38479	89.8336	1.14471	0.651231
Triprolidine	Cation	278.398	3.86072	2.43914	2	-3.31093	-2.92507	0.652546	16.13	0.061959	17.9517	0.942074	3.56537
Abbreviations: MW – molecular weight; logP – logarithm of n-octanol/water lipophilicity coefficent; logD – logarithm of distribution coefficient for pH=7.4; FrRotB – a number of free rotable bonds; logPeff – logarithm of passive mebrane permeability (cm/s * 10-4); logSw – logarithm of native water solubility (mol/L); T_Dipole – topological dipole moment; TPSA – topological polar surface area; Rel…

[truncated: 3 more sheets: Table S10, Table S11, Table S12]
